# Supplementary material for: Design, synthesis, and biological evaluation of novel thieno[3,2-d]pyrimidine derivatives as potent antitumor agents
Source: Royal Society of Chemistry journal article supplement (doi:10.1039/d3nj03576j), 2023-01-01

# Design, synthesis, and biological evaluation of novel thieno[3,2-d]pyrimidine derivatives as potent antitumor agents

Yadong Zhang<sup>a</sup>, Jiwei Shen<sup>a,b,c</sup>, JiaWei Li<sup>a</sup>, Zhi Wang<sup>a</sup>, Yue Wang<sup>a</sup>, Yan, Zhu<sup>a</sup>, Shi Ding<sup>a,b,c</sup>, YunPeng Zhou<sup>a,b,c</sup>, Ye Chen<sup>a,b,c\*</sup> and Ju Liu<sup>a,b,c\*</sup>

*a: College of Pharmacy of Liaoning University, Shenyang, Liaoning 110036, PR China*

*b: API Engineering Technology Research Center of Liaoning Province, Shenyang, Liaoning 110036, PR China*

*c: Small Molecular Targeted Drug R&D Engineering Research Center of Liaoning Province, Shenyang, Liaoning 110036, PR China d Shenyang Xingqi Pharmaceutical Co., Ltd*

## supporting information

### <sup>1</sup>H NMR spectrum of compound 5

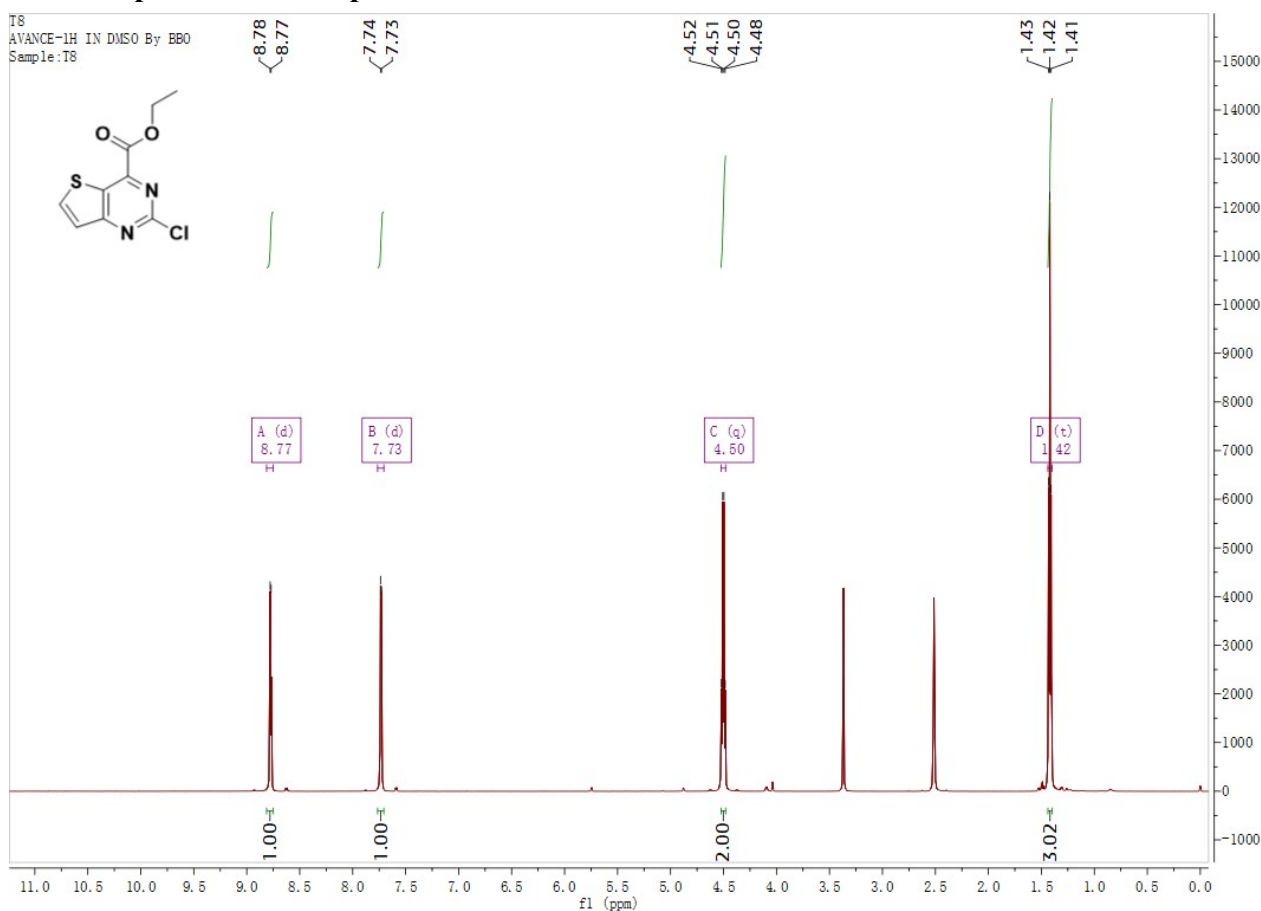

### <sup>1</sup>H NMR spectrum of compound 8a

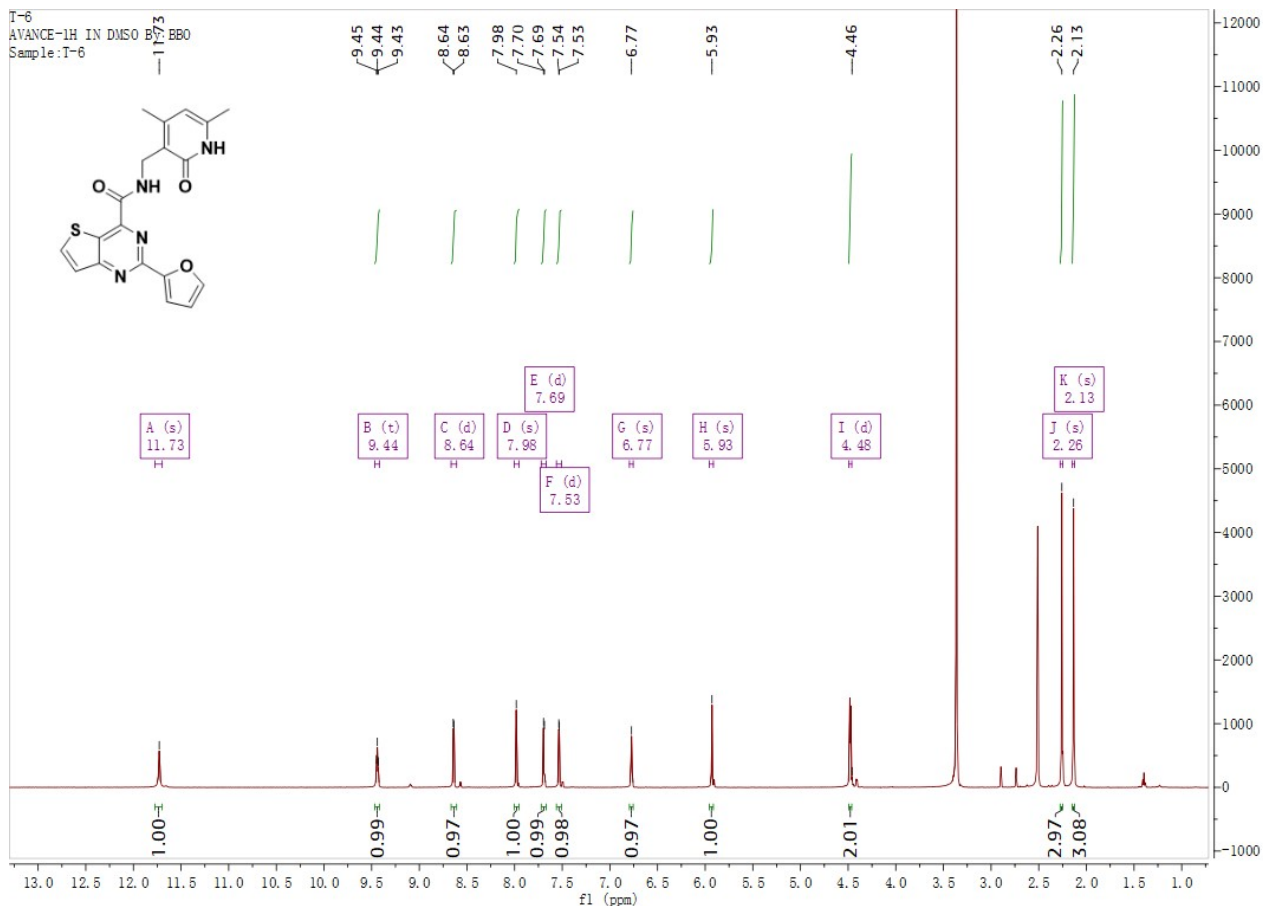

### <sup>1</sup>H NMR spectrum of compound 9a1

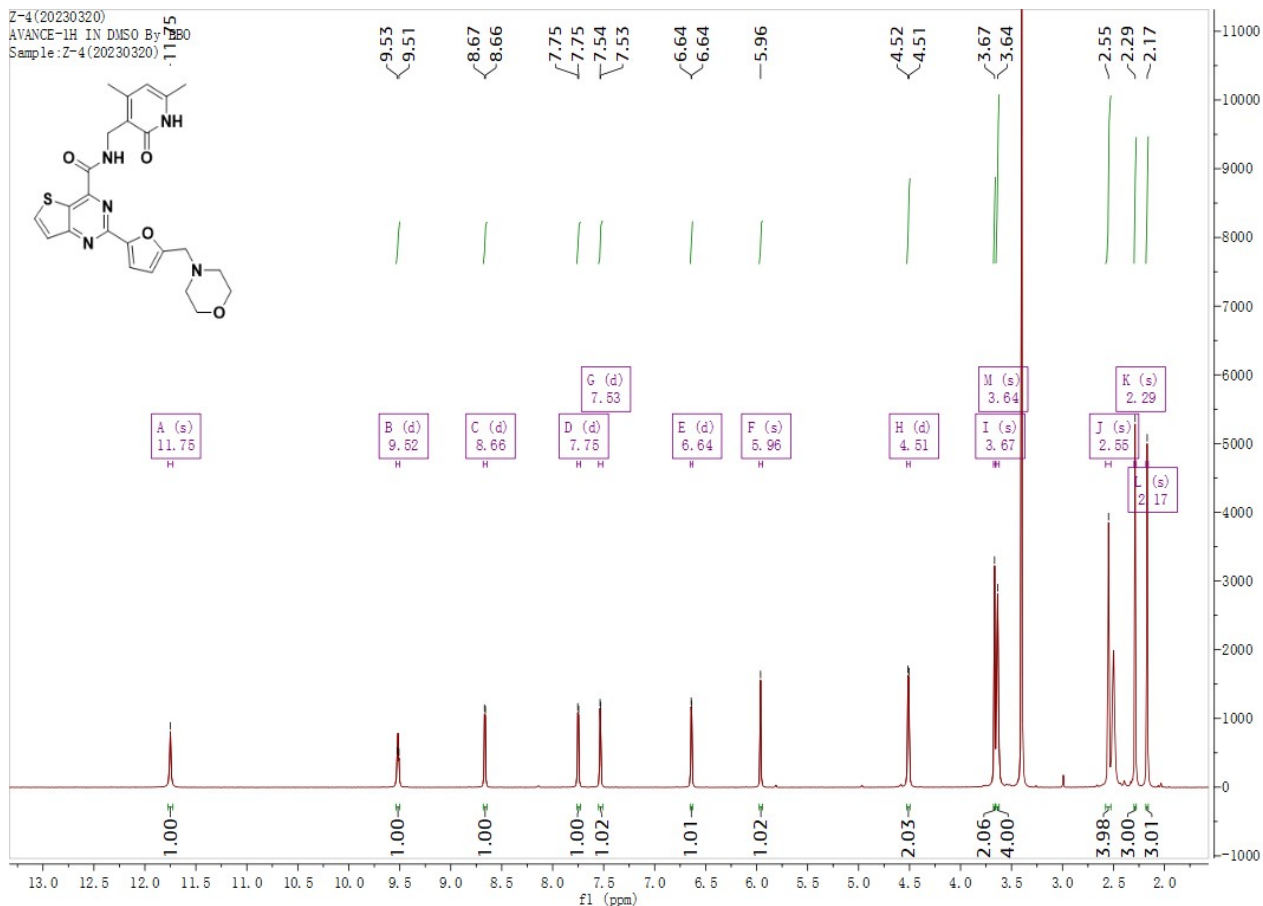

### <sup>1</sup>H NMR spectrum of compound 9a2

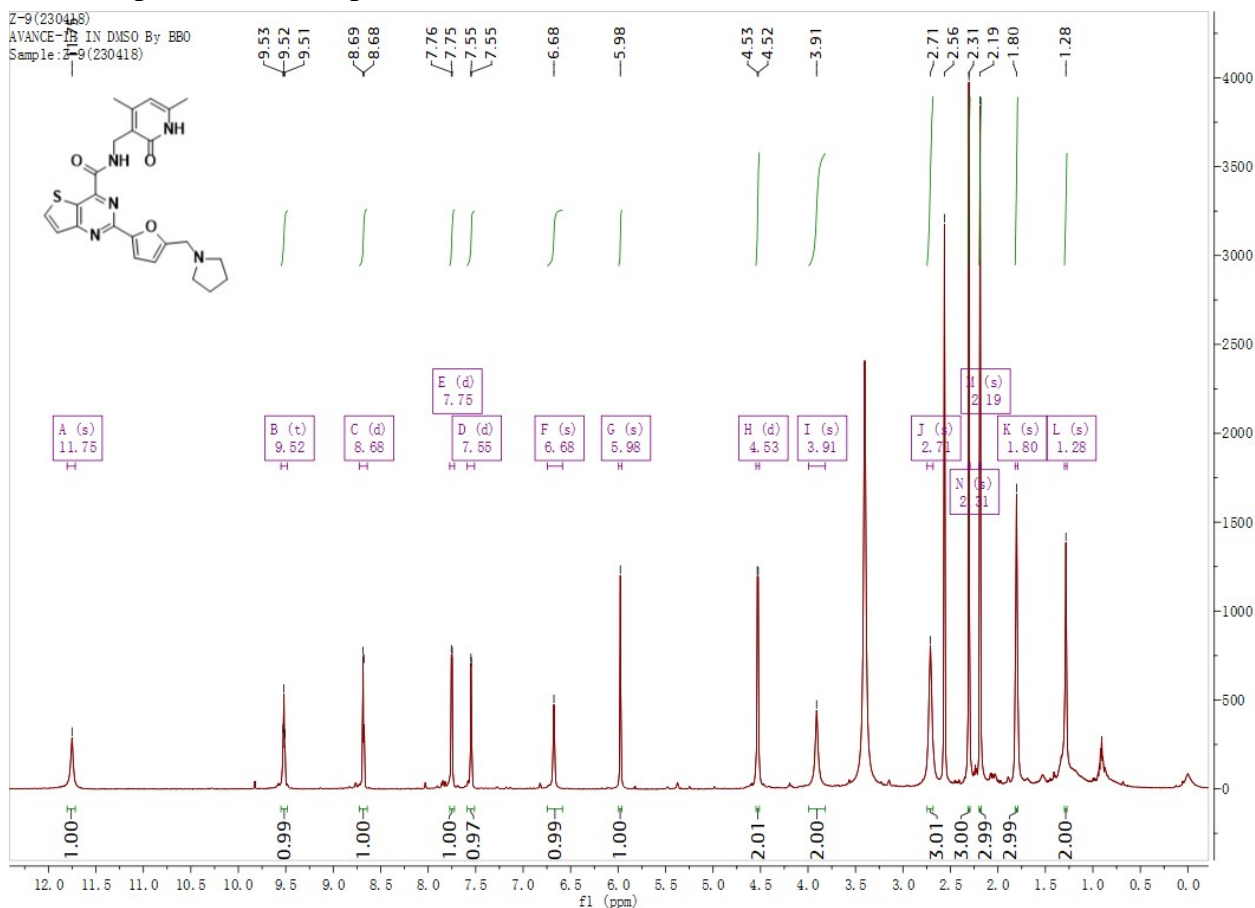

### <sup>1</sup>H NMR spectrum of compound 9a3

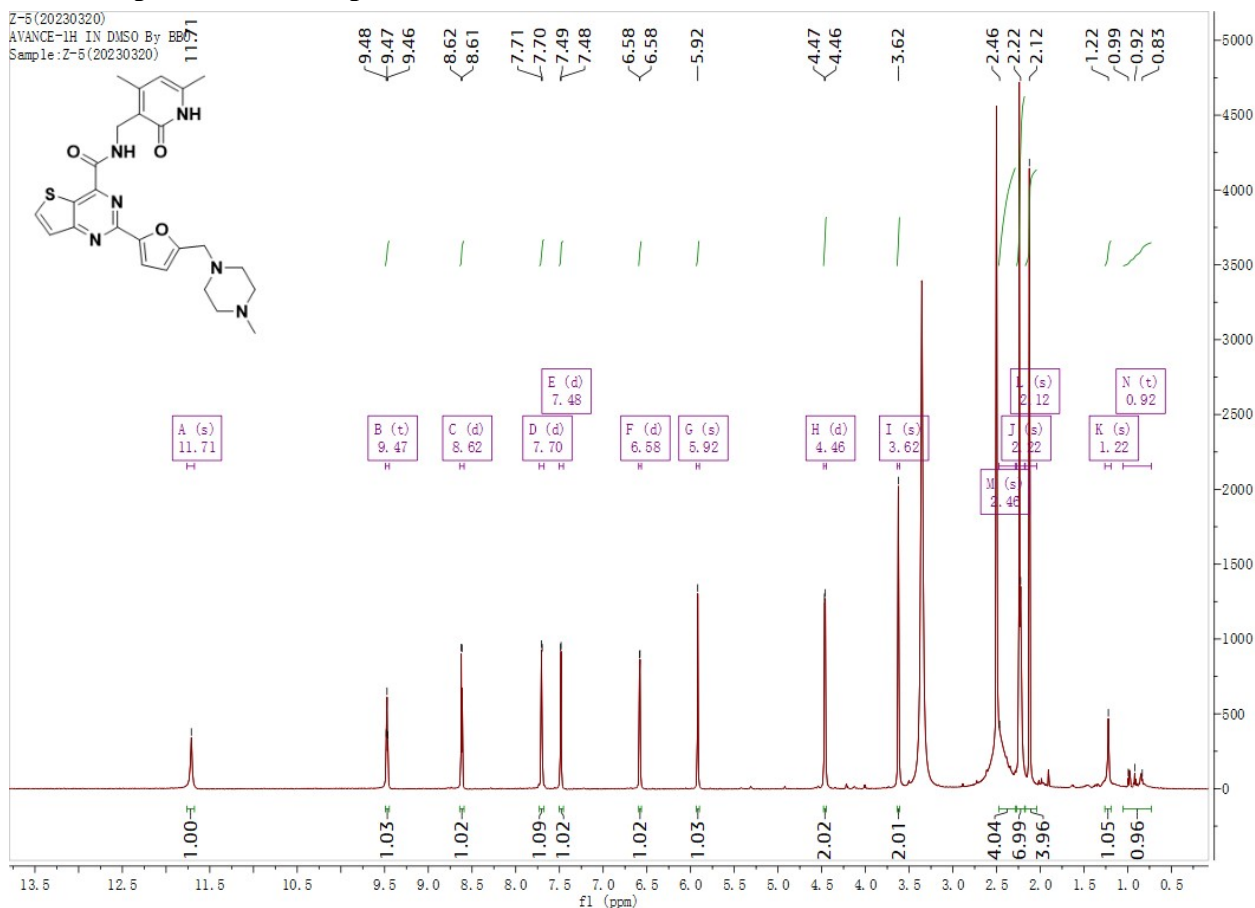

### <sup>1</sup>H NMR spectrum of compound 9a4

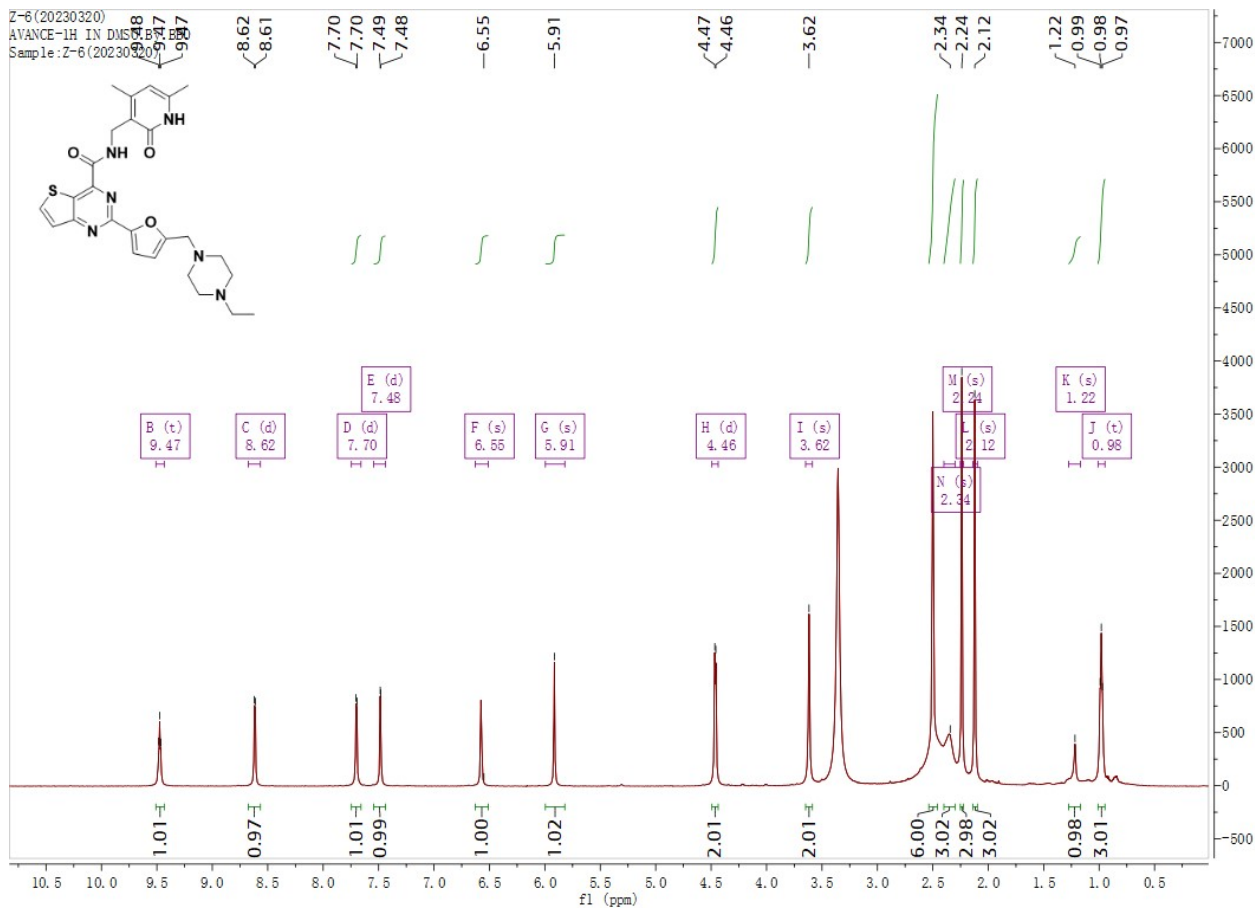

### <sup>1</sup>H NMR spectrum of compound 9a5

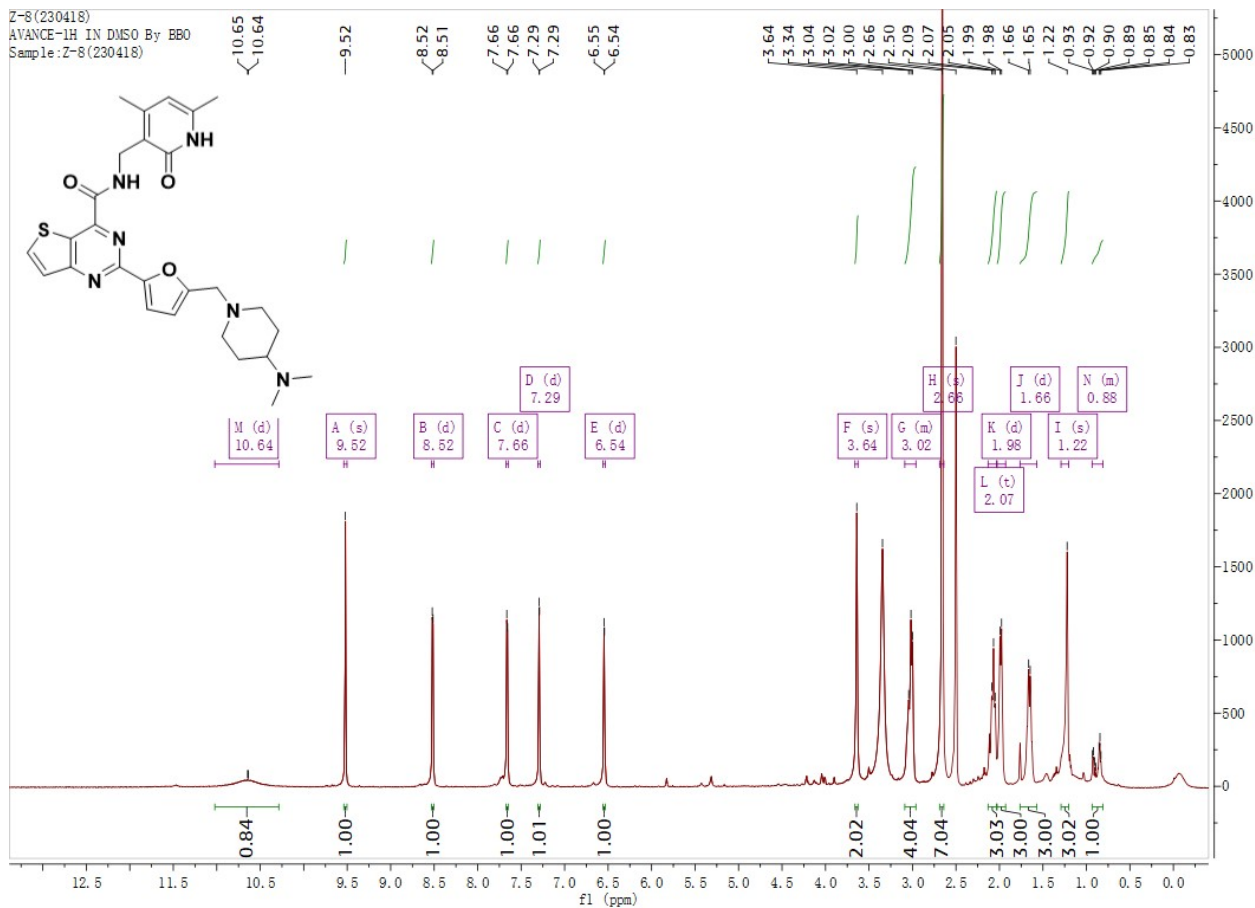

### <sup>1</sup>H NMR spectrum of compound 9a6

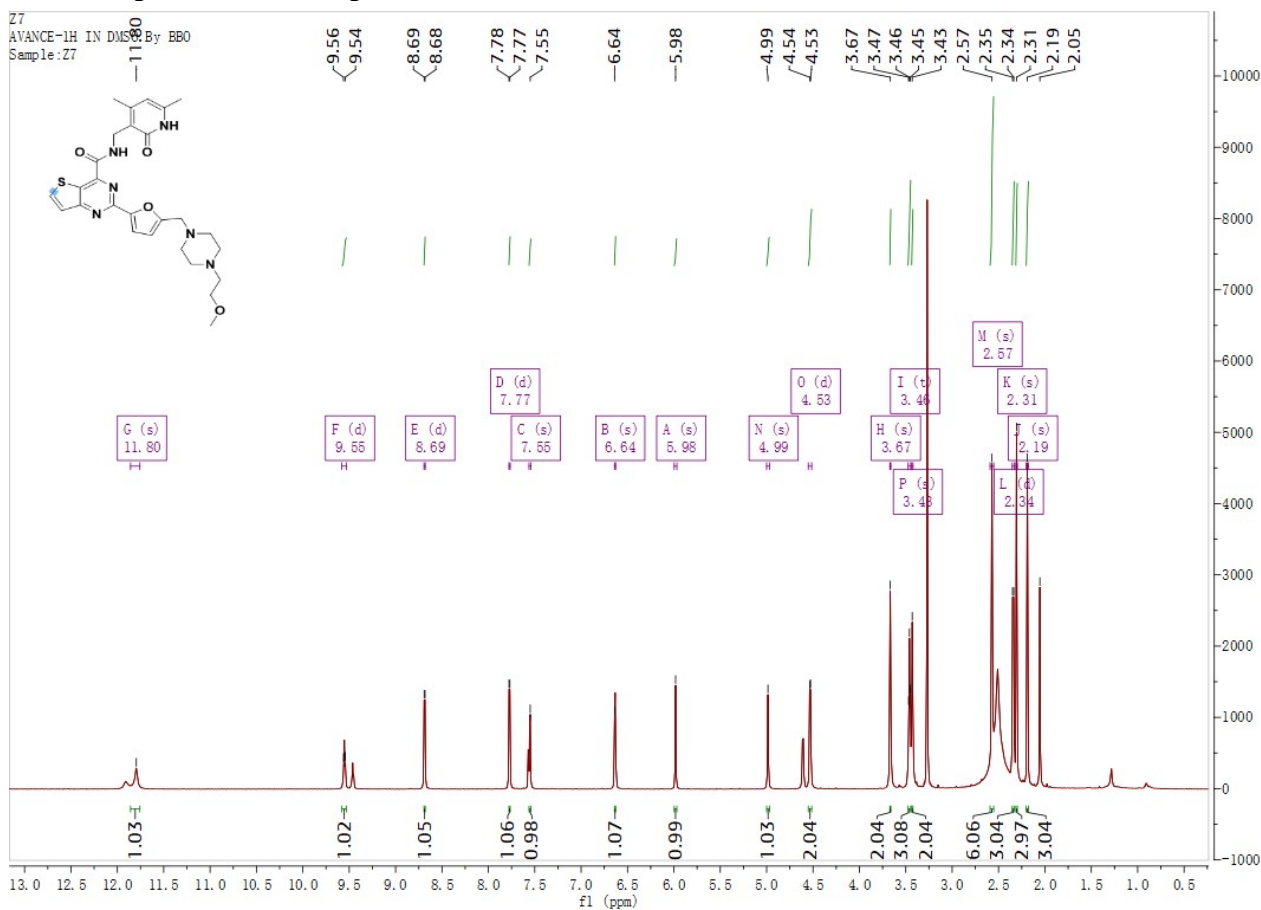

### <sup>1</sup>H NMR spectrum of compound 12a

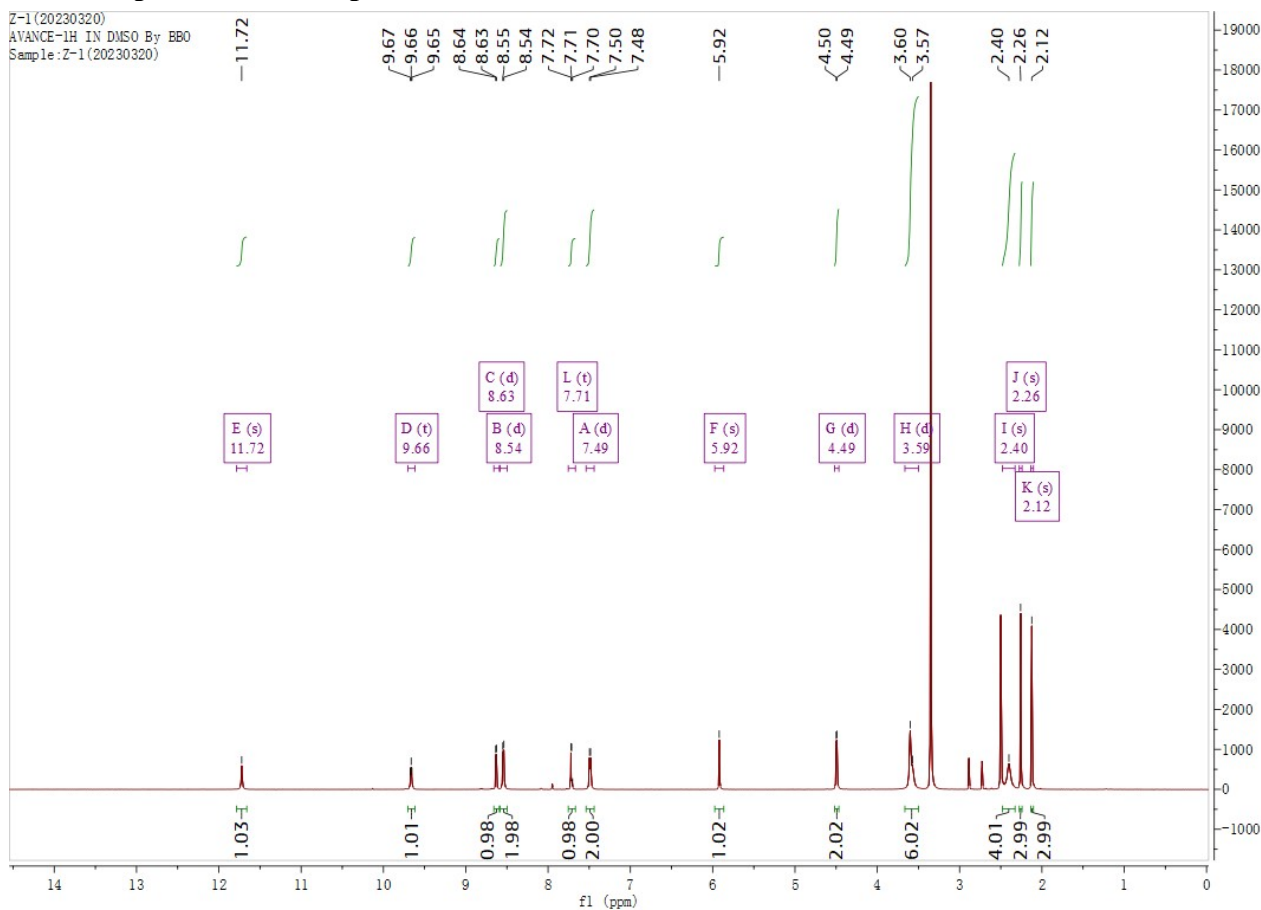



### <sup>1</sup>H NMR spectrum of compound 12b

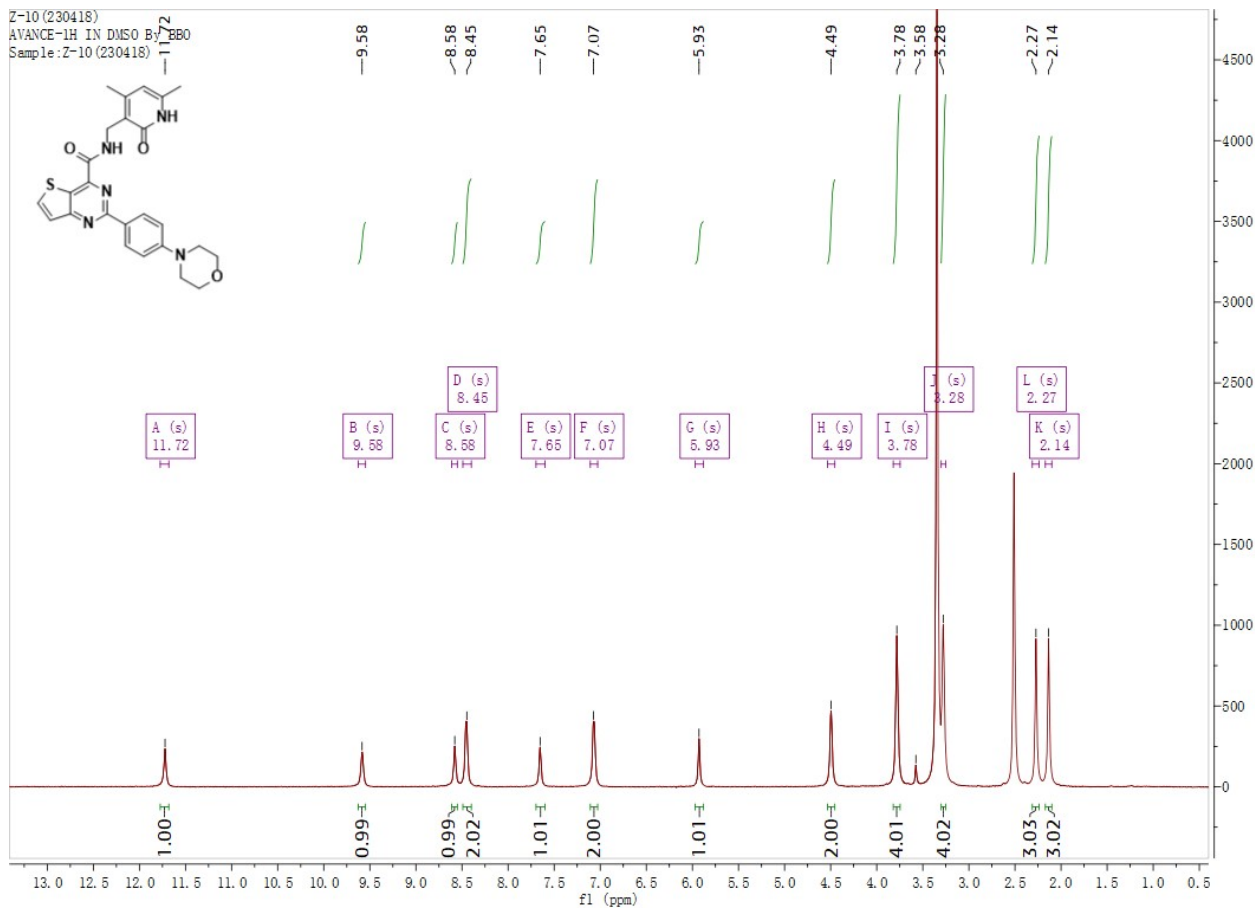

### <sup>1</sup>H NMR spectrum of compound 12c

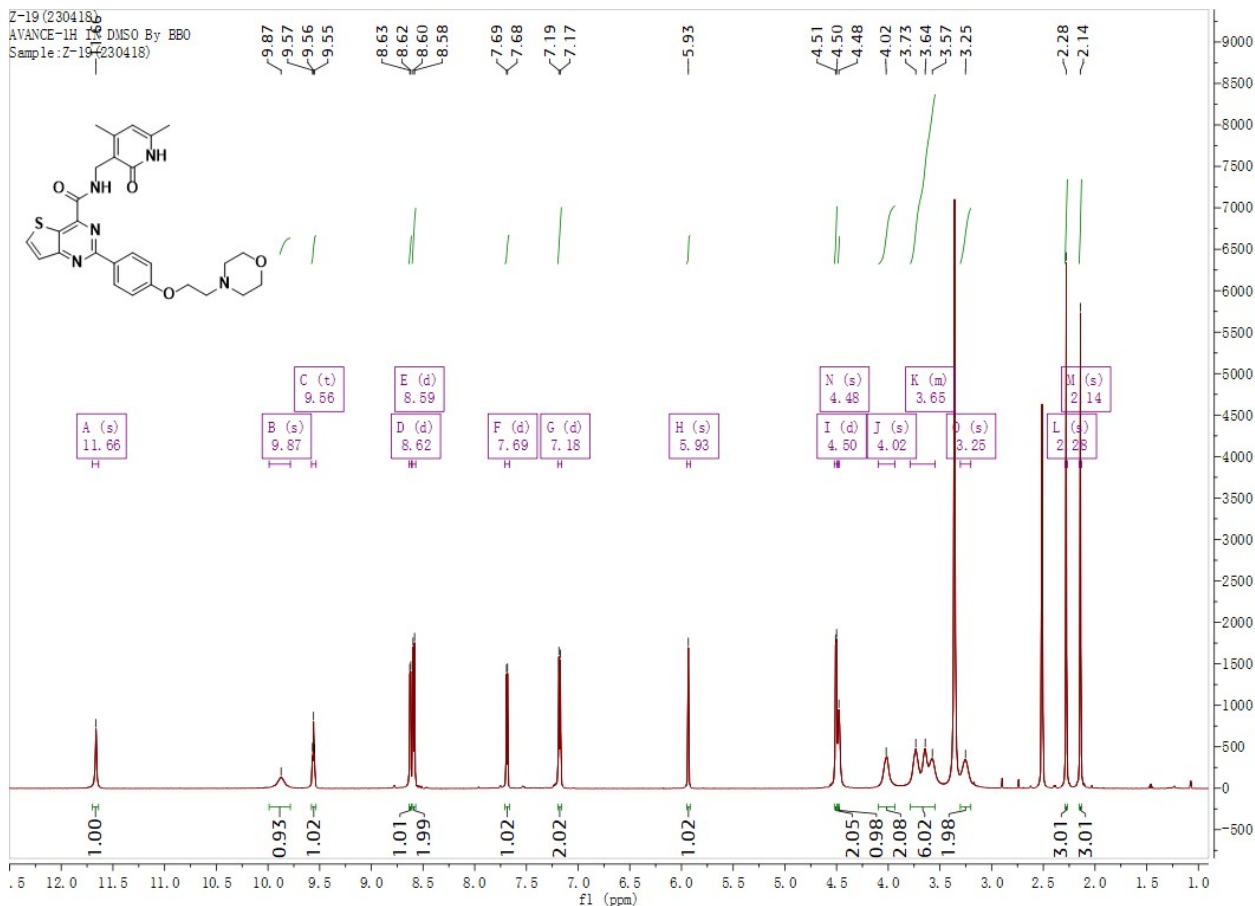

### <sup>1</sup>H NMR spectrum of compound 12d

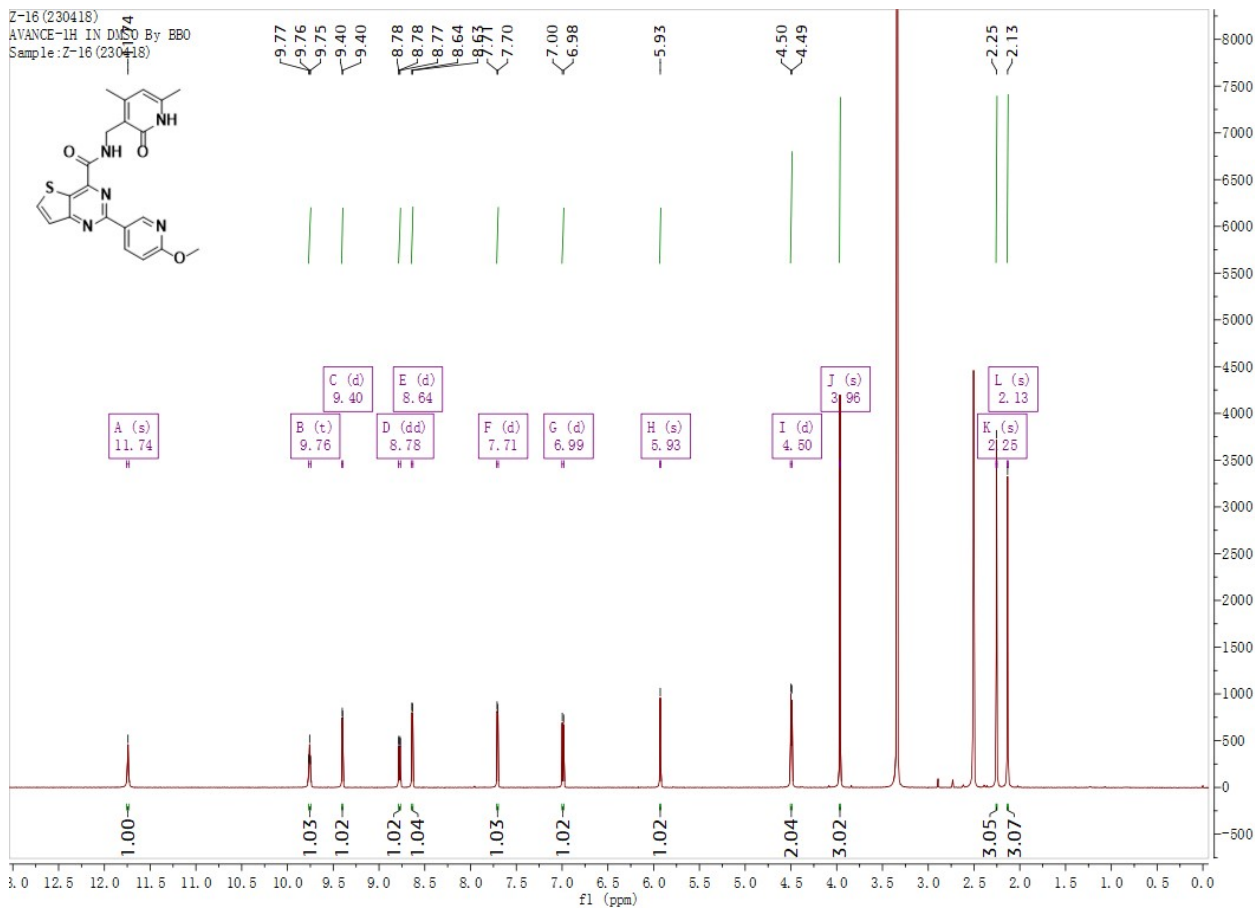

### <sup>1</sup>H NMR spectrum of compound 8b

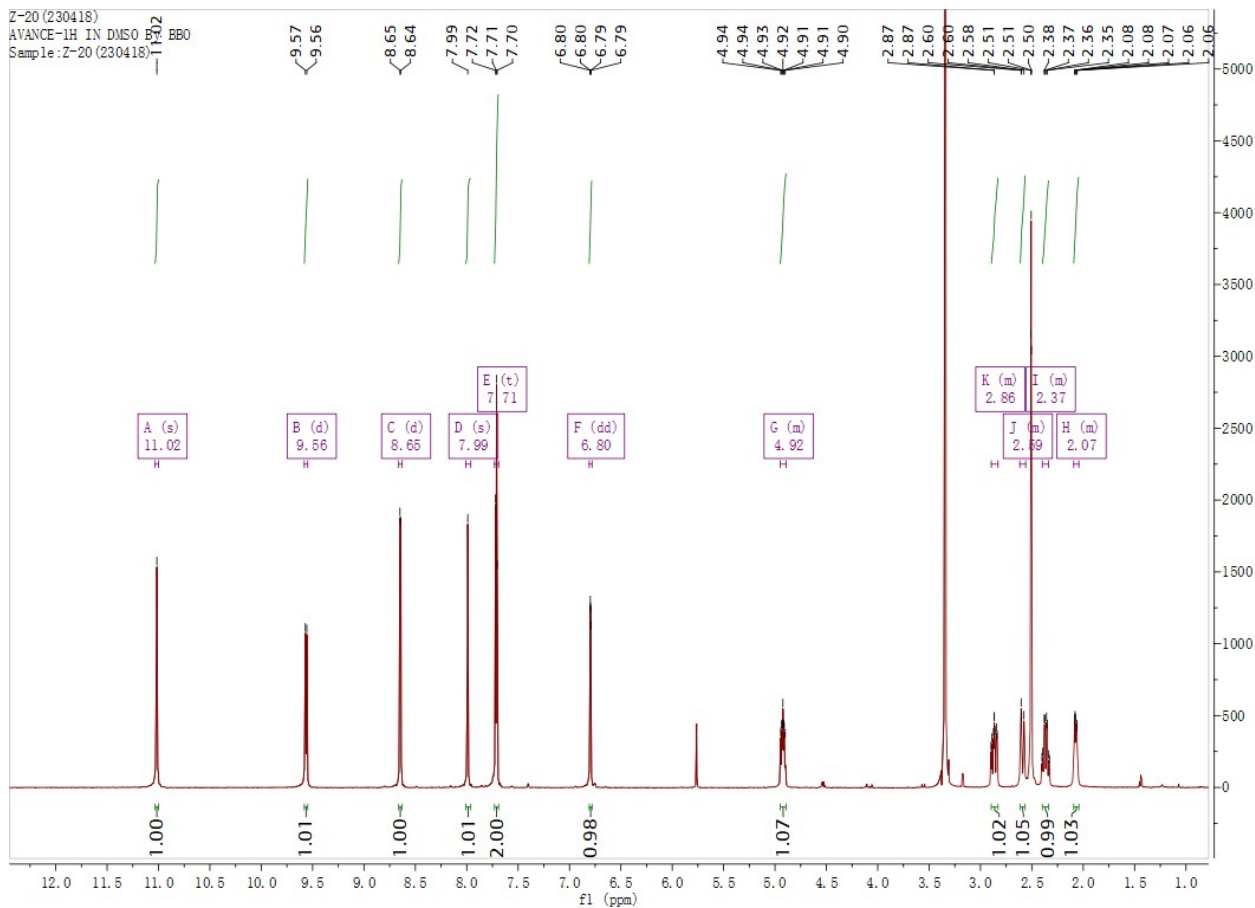

### <sup>1</sup>H NMR spectrum of compound 12e

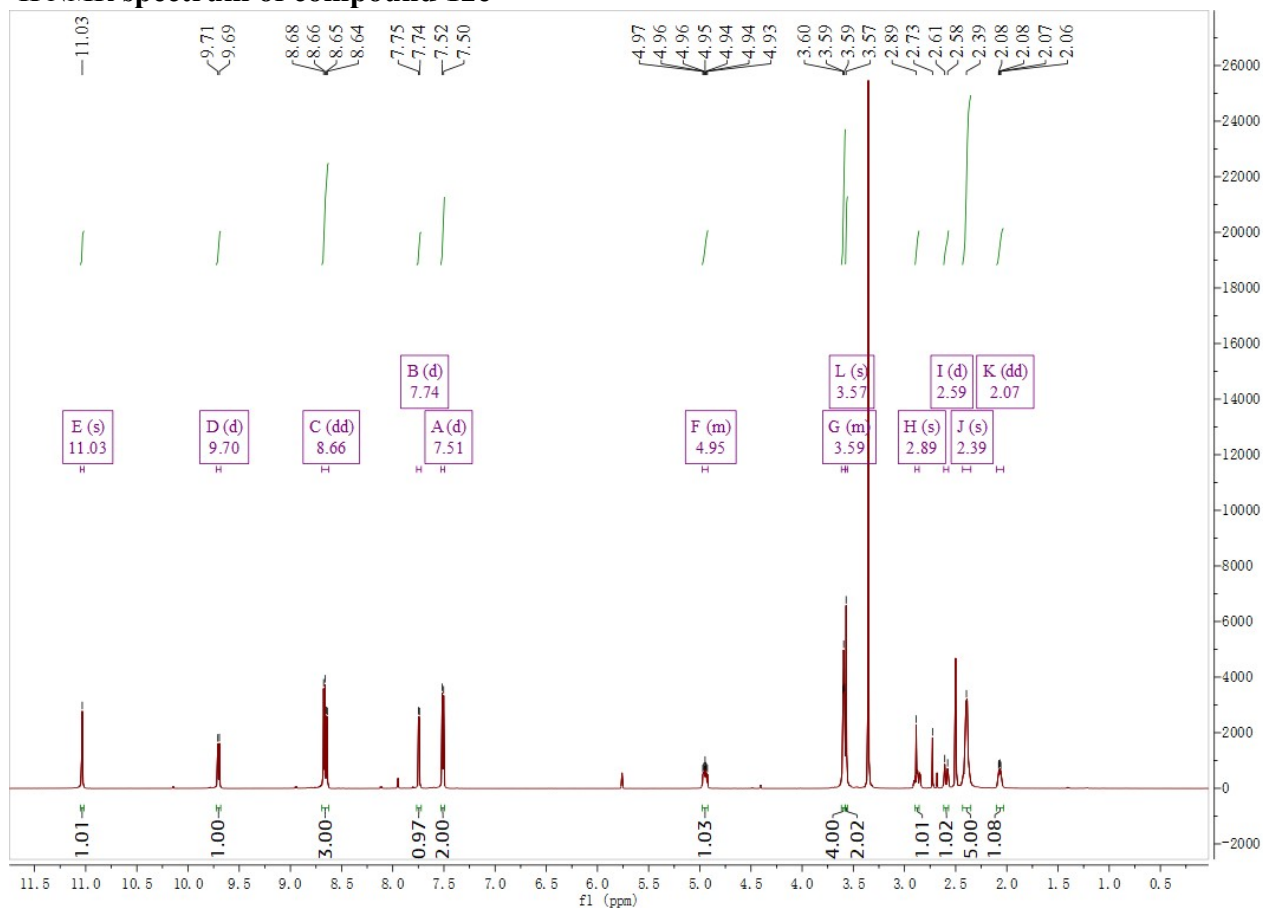

### <sup>1</sup>H NMR spectrum of compound 12f

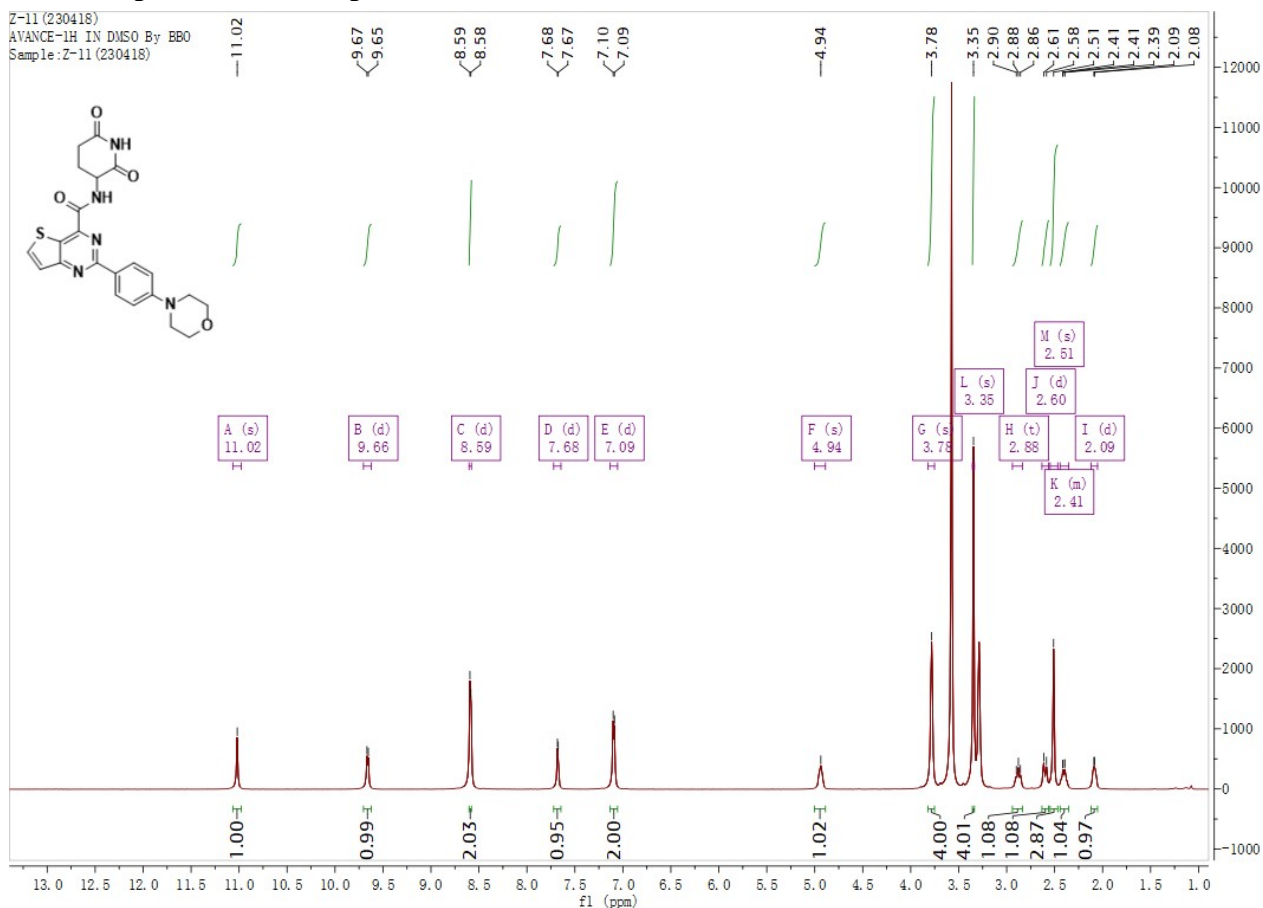



# <sup>1</sup>H NMR spectrum of compound 12g

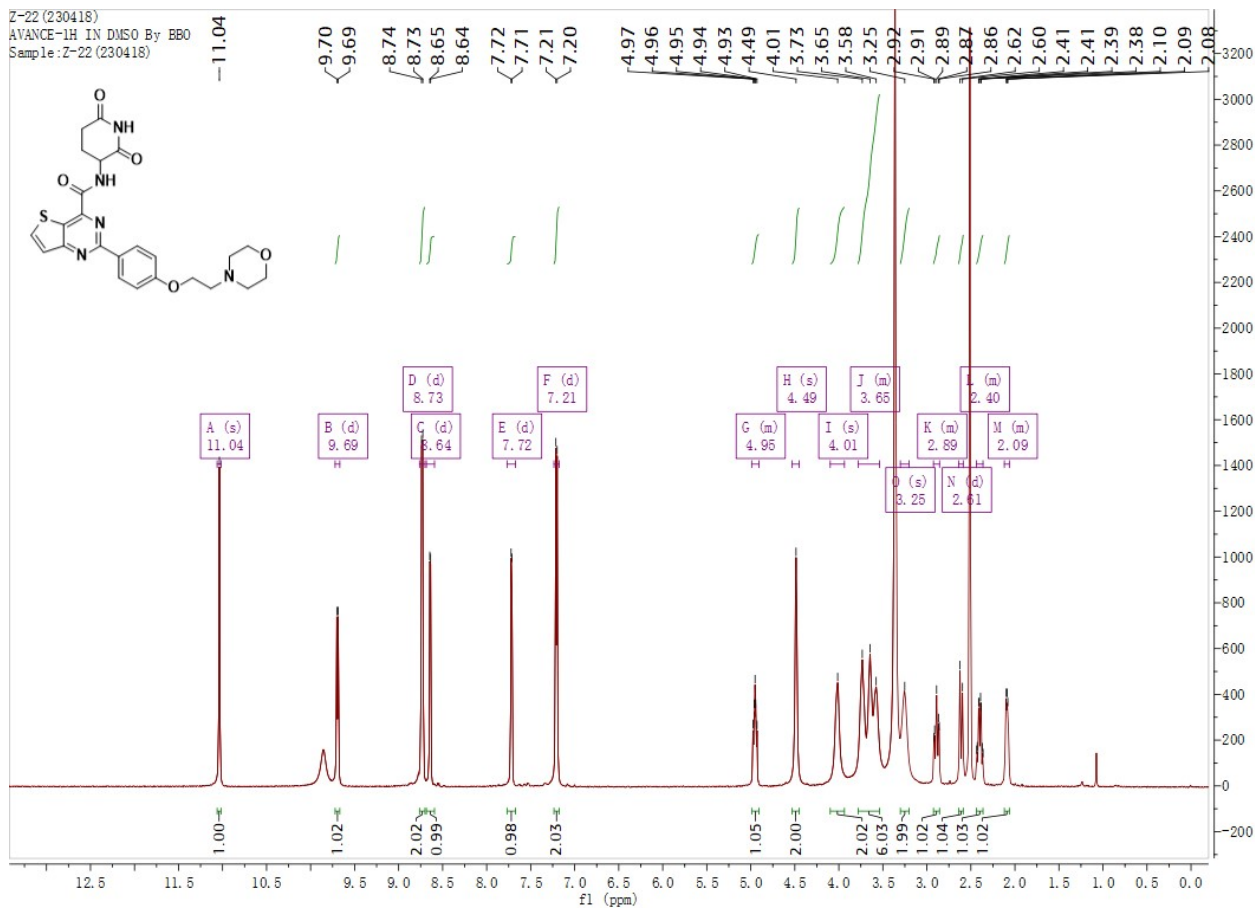

# <sup>1</sup>H NMR spectrum of compound 12h

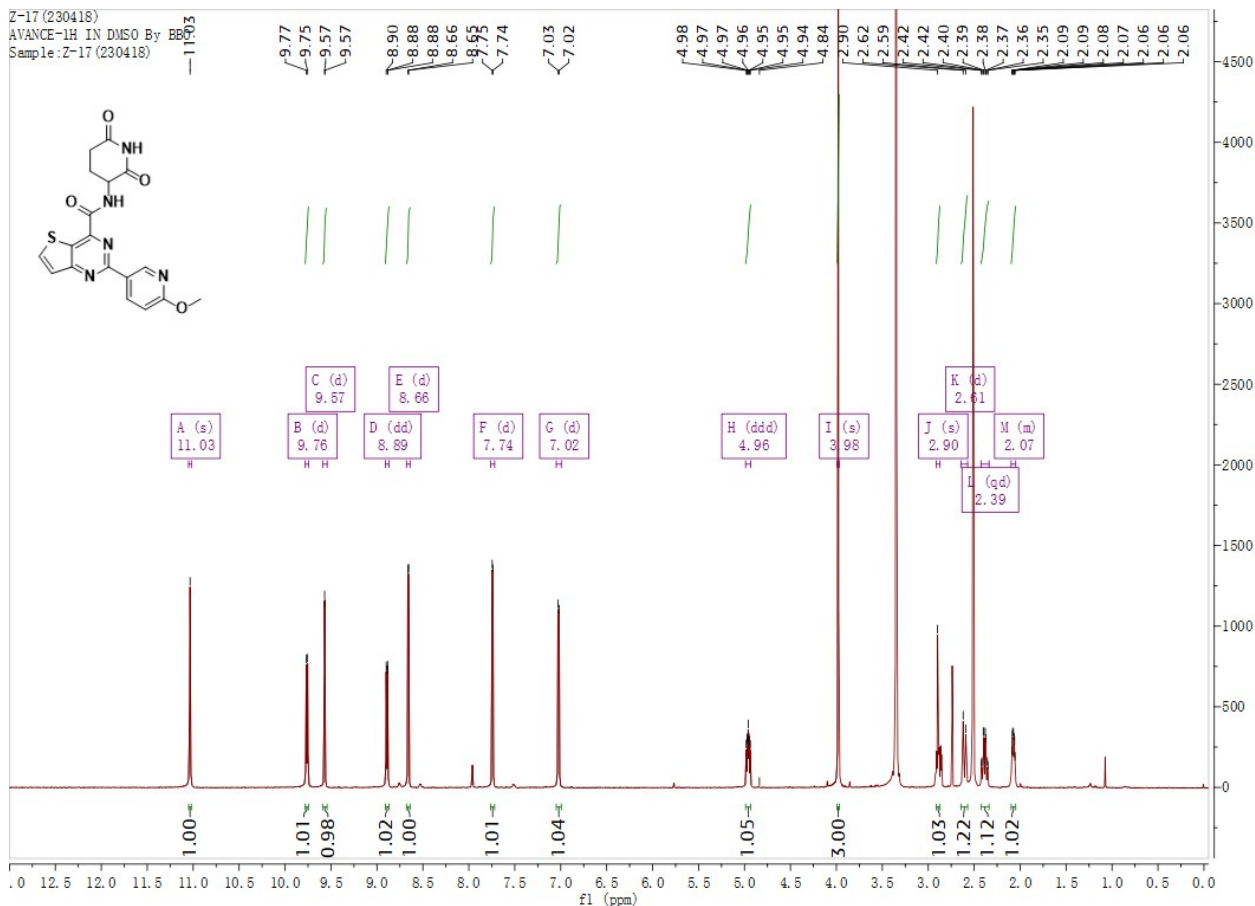

### <sup>1</sup>H NMR spectrum of compound 8c

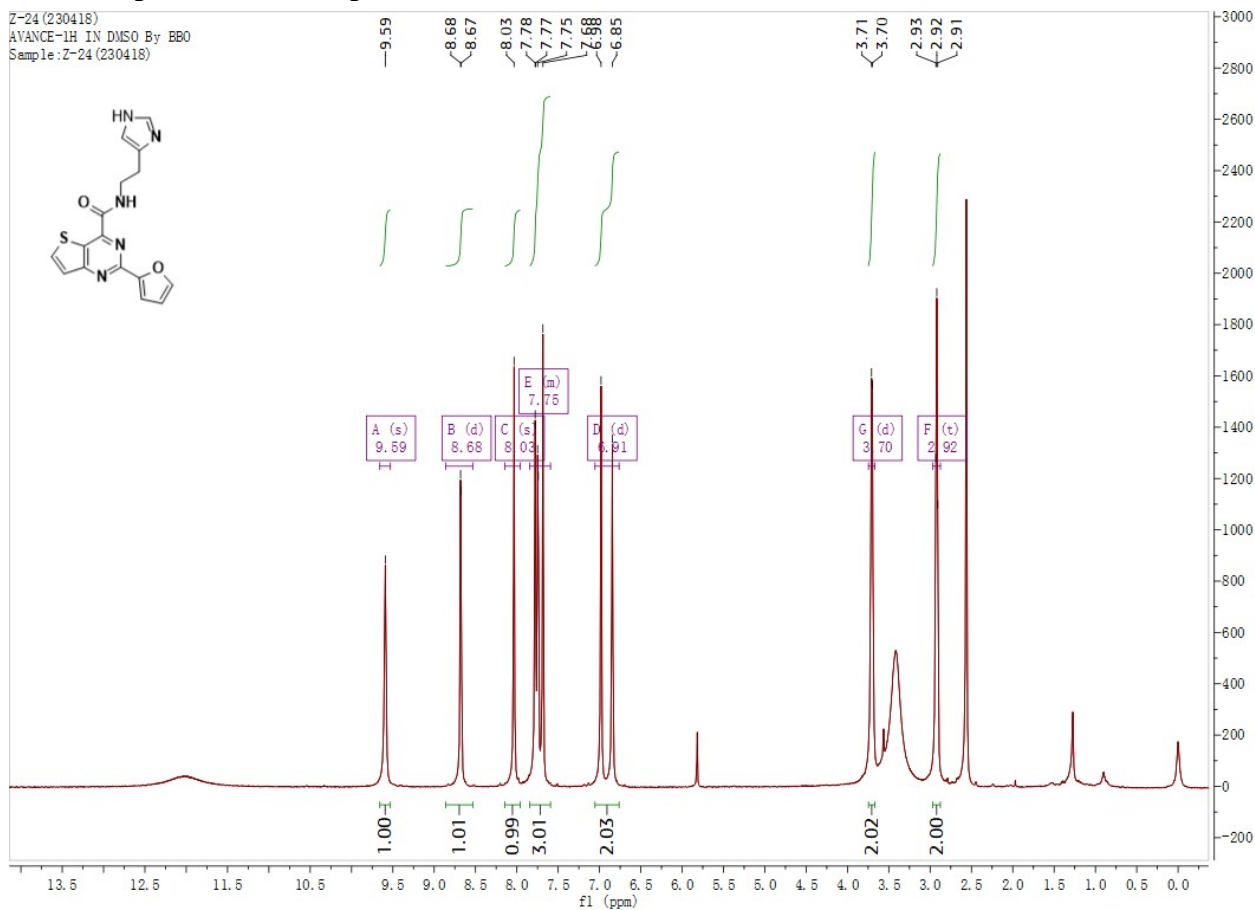

### <sup>1</sup>H NMR spectrum of compound 12i

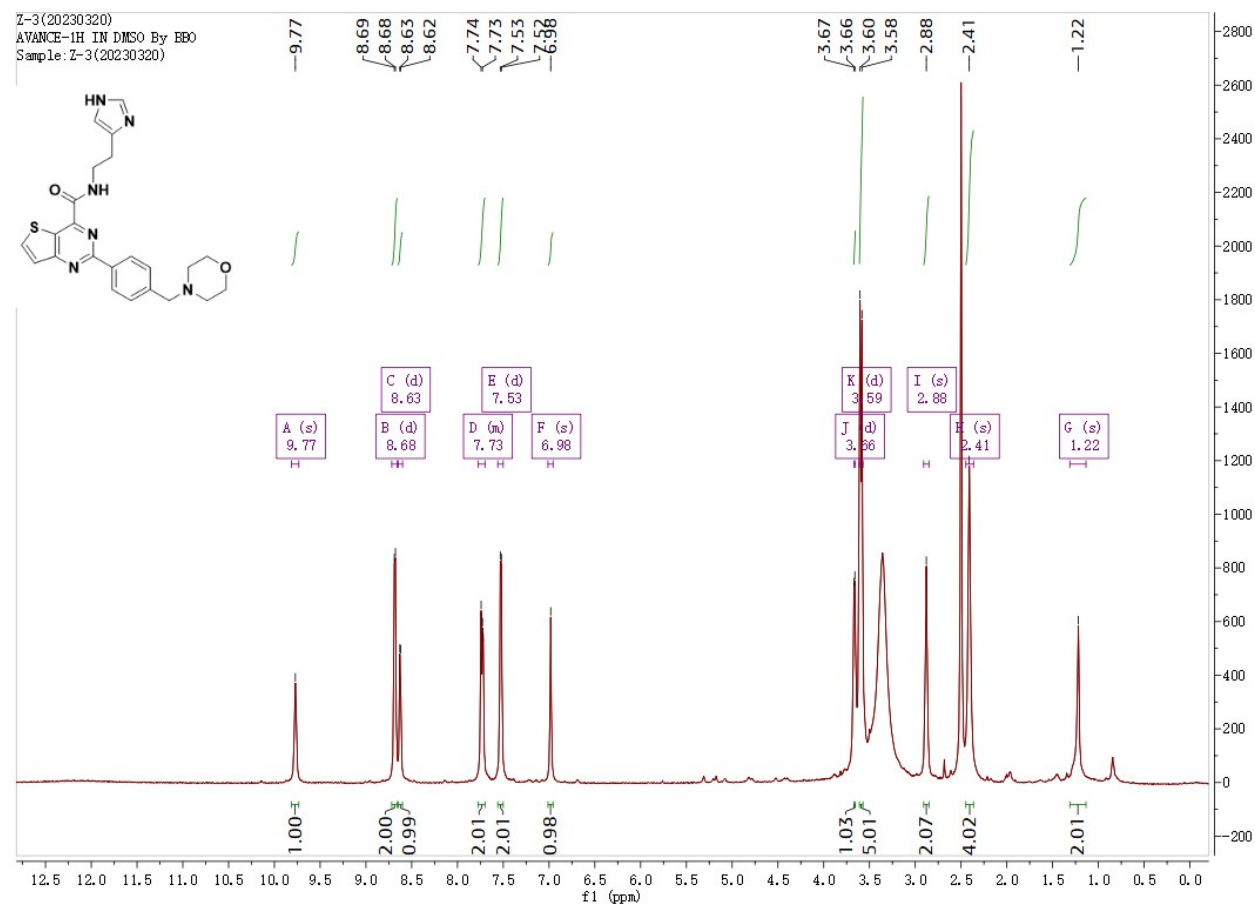

### <sup>1</sup>H NMR spectrum of compound 12j

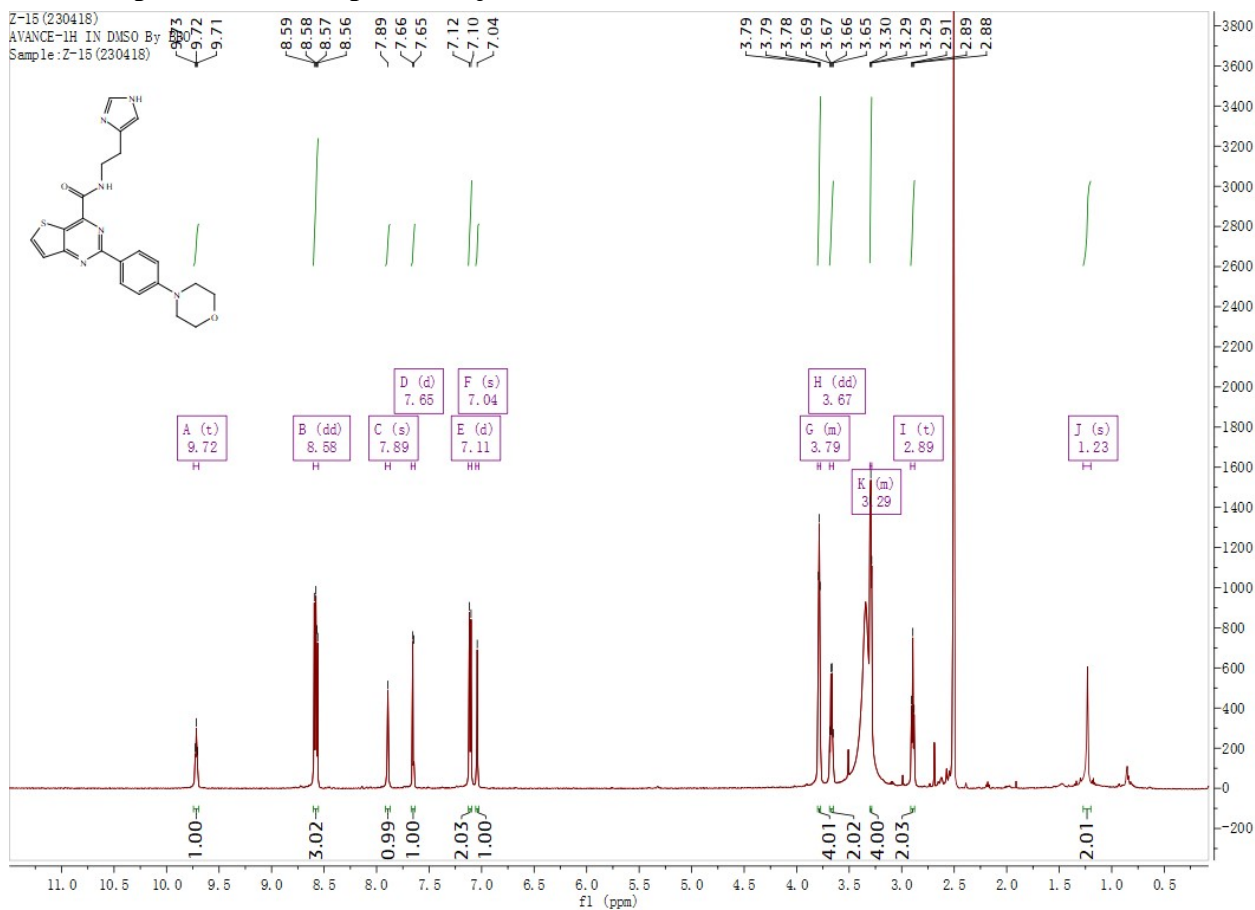

### <sup>1</sup>H NMR spectrum of compound 12k

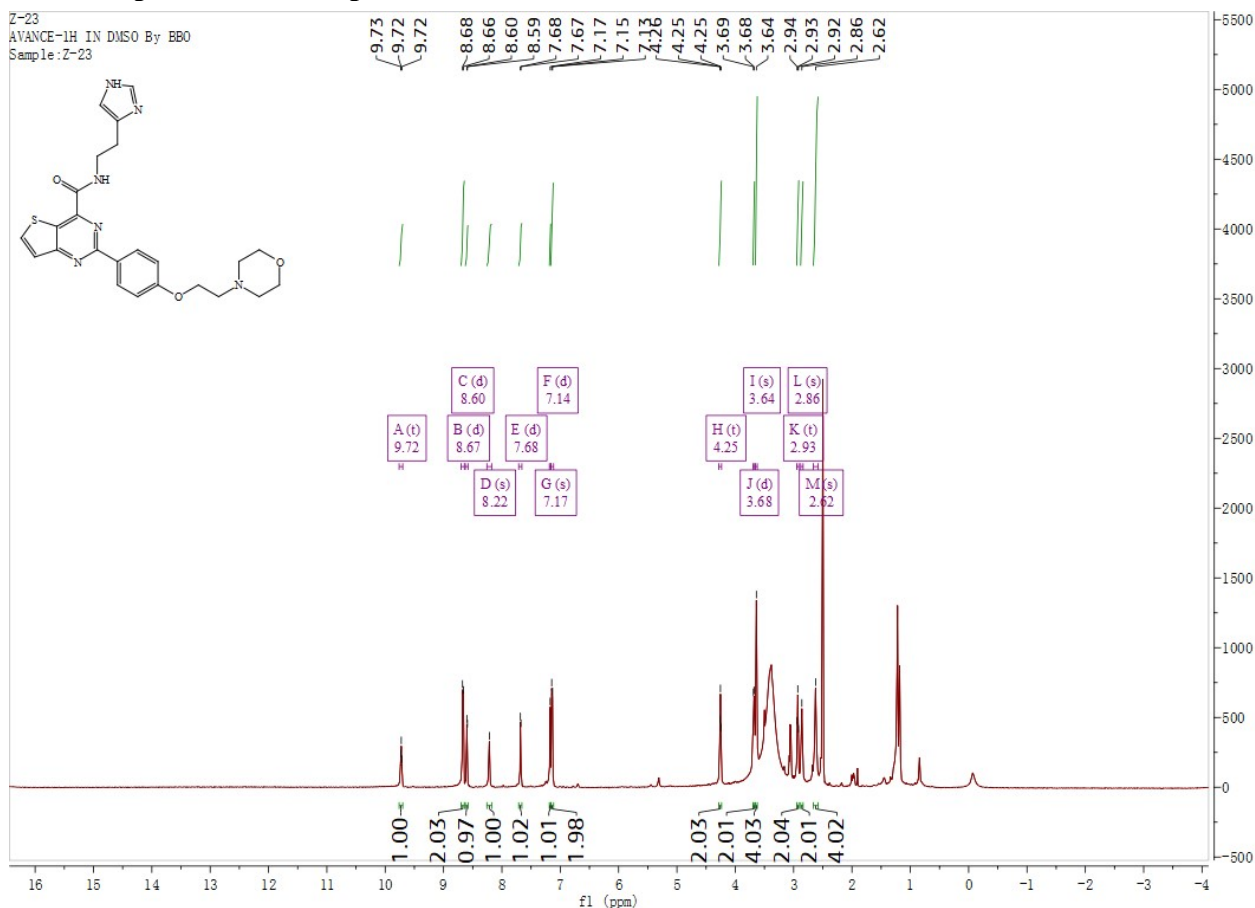

### <sup>1</sup>H NMR spectrum of compound 12l

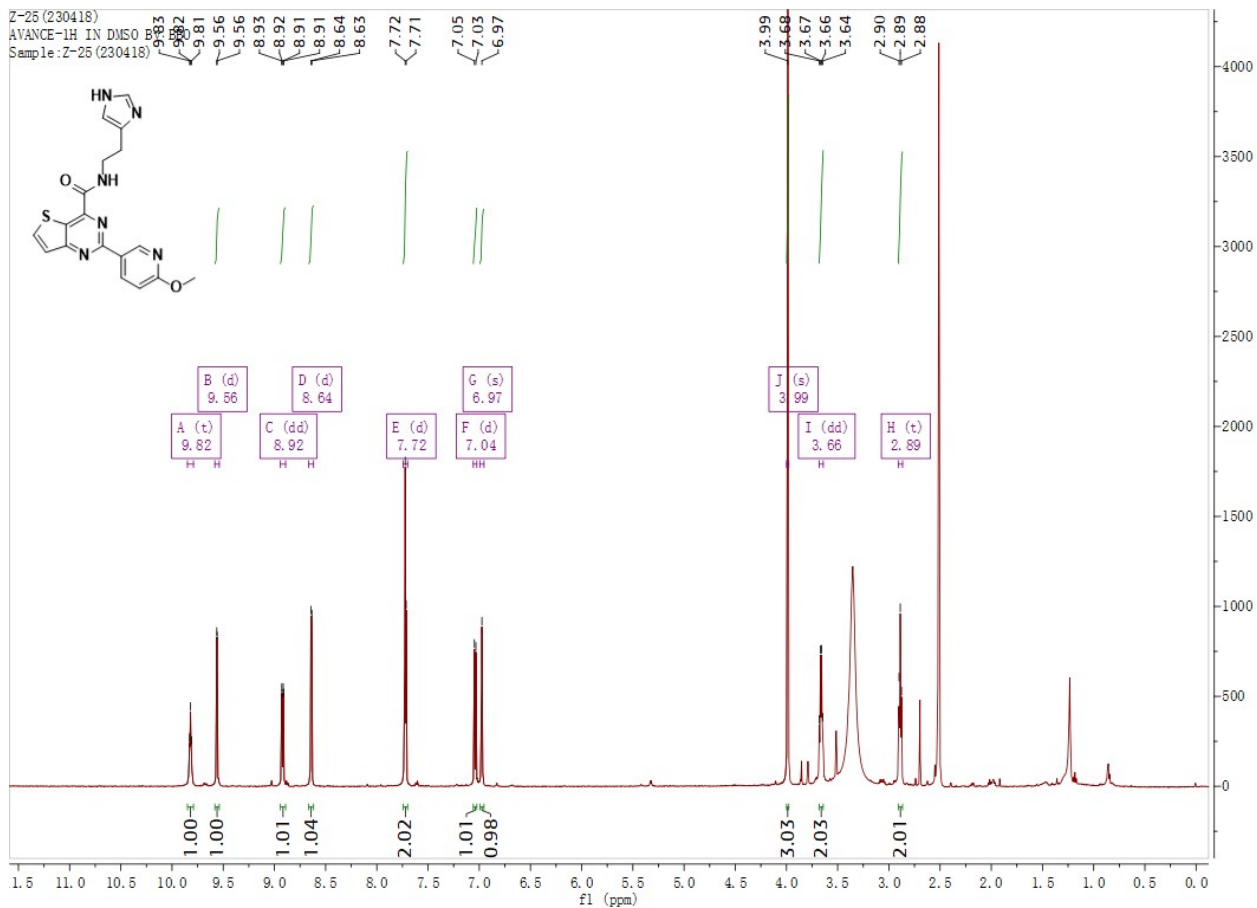

### <sup>1</sup>H NMR spectrum of compound 8d

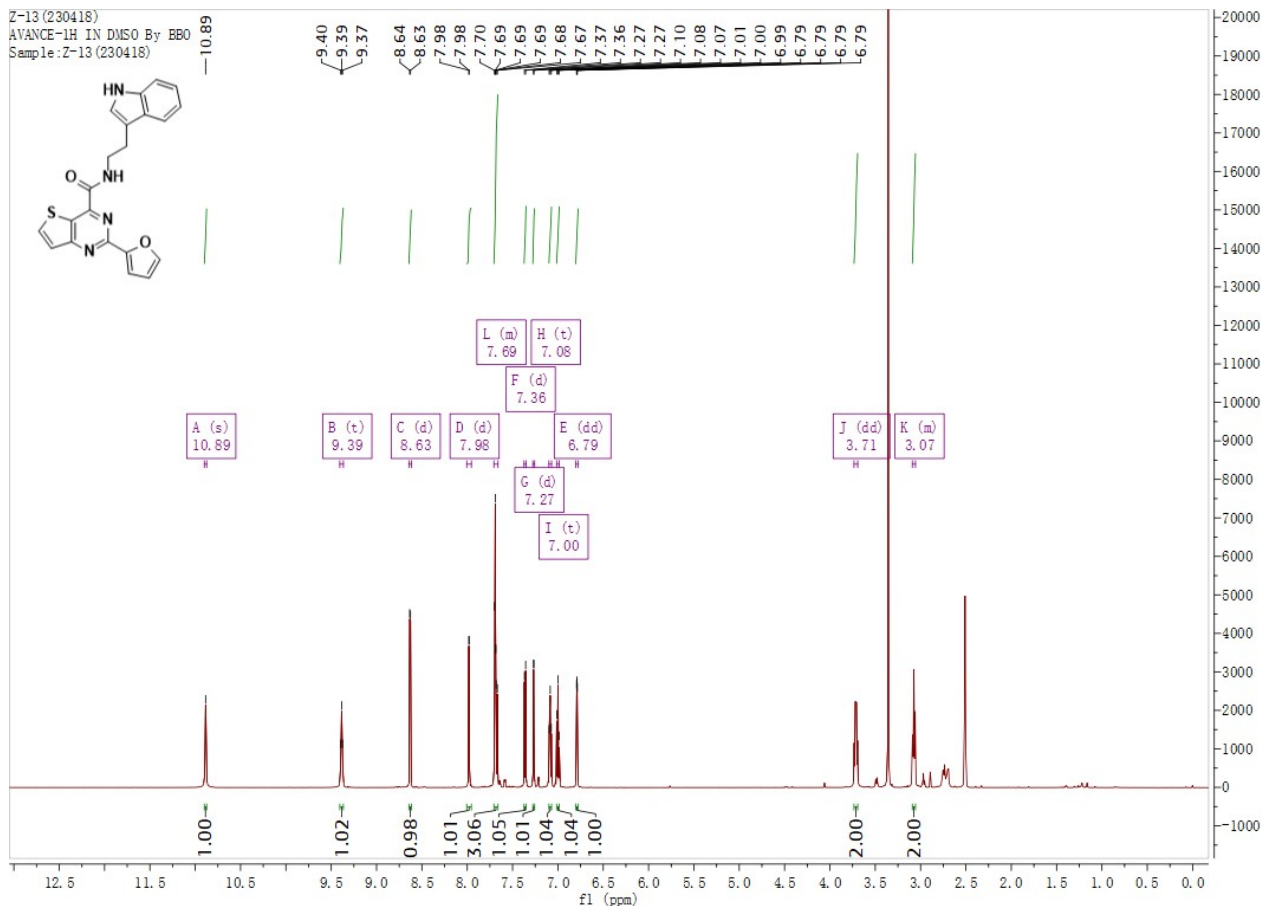

### <sup>1</sup>H NMR spectrum of compound 12m

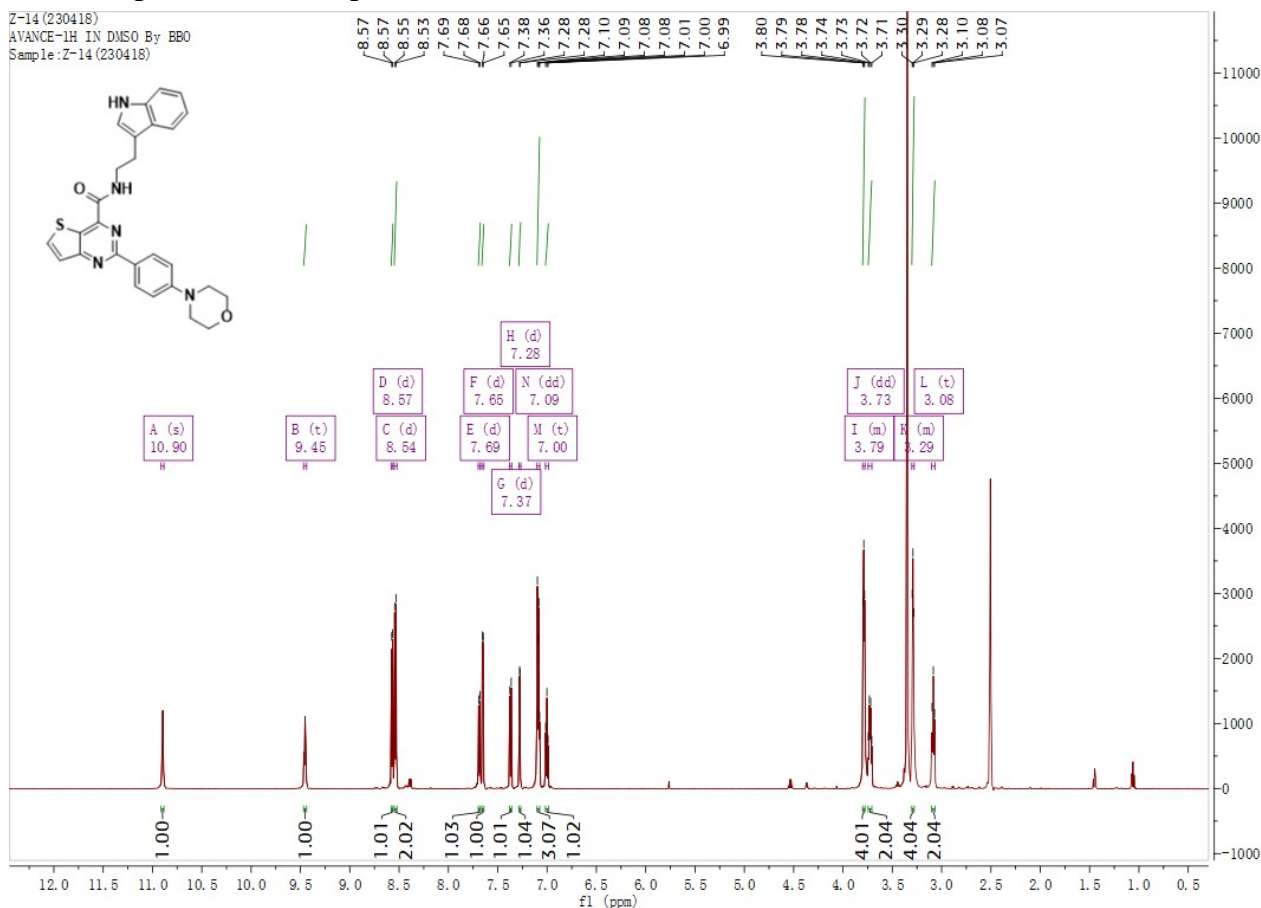

### <sup>1</sup>H NMR spectrum of compound 12n

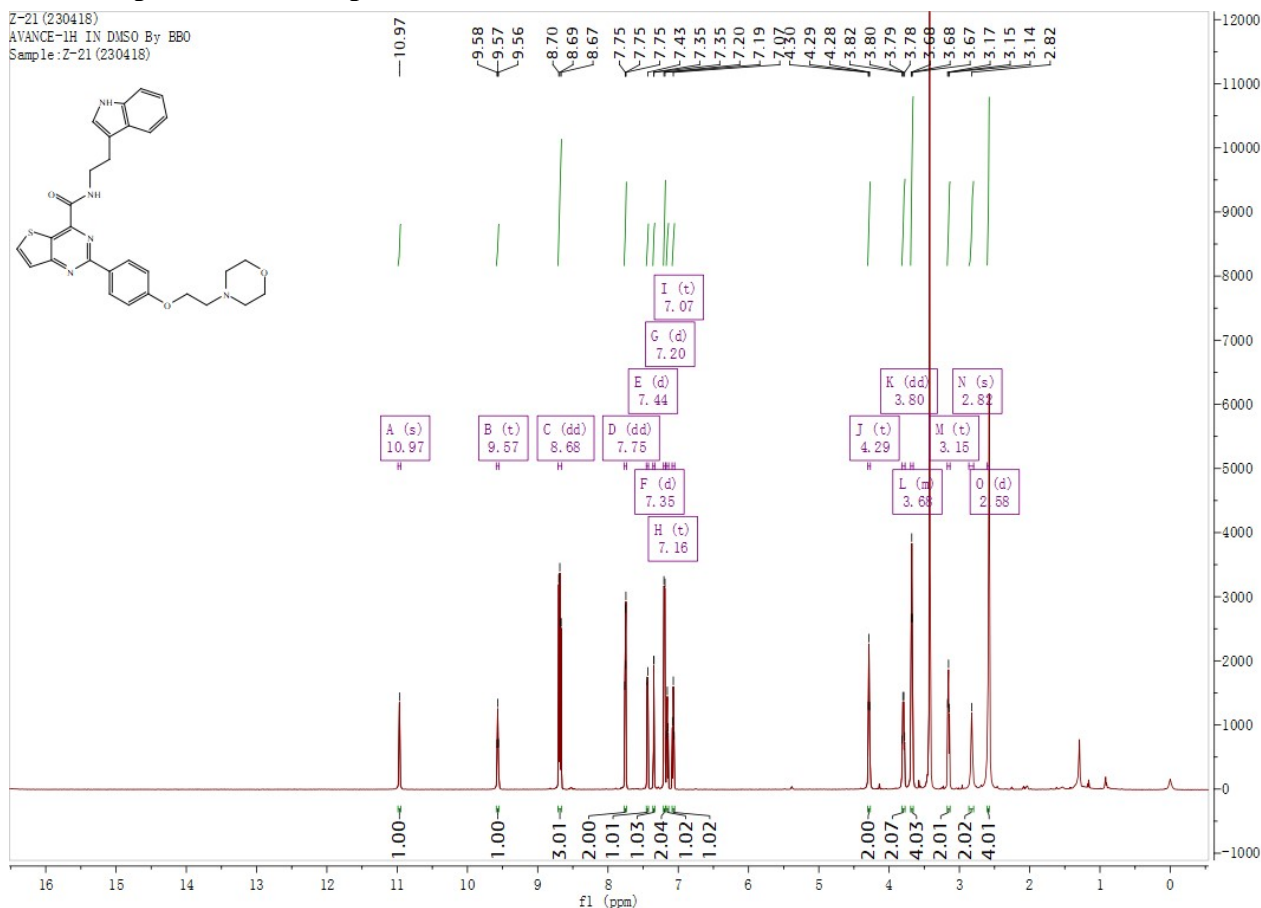



# <sup>1</sup>H NMR spectrum of compound 12o

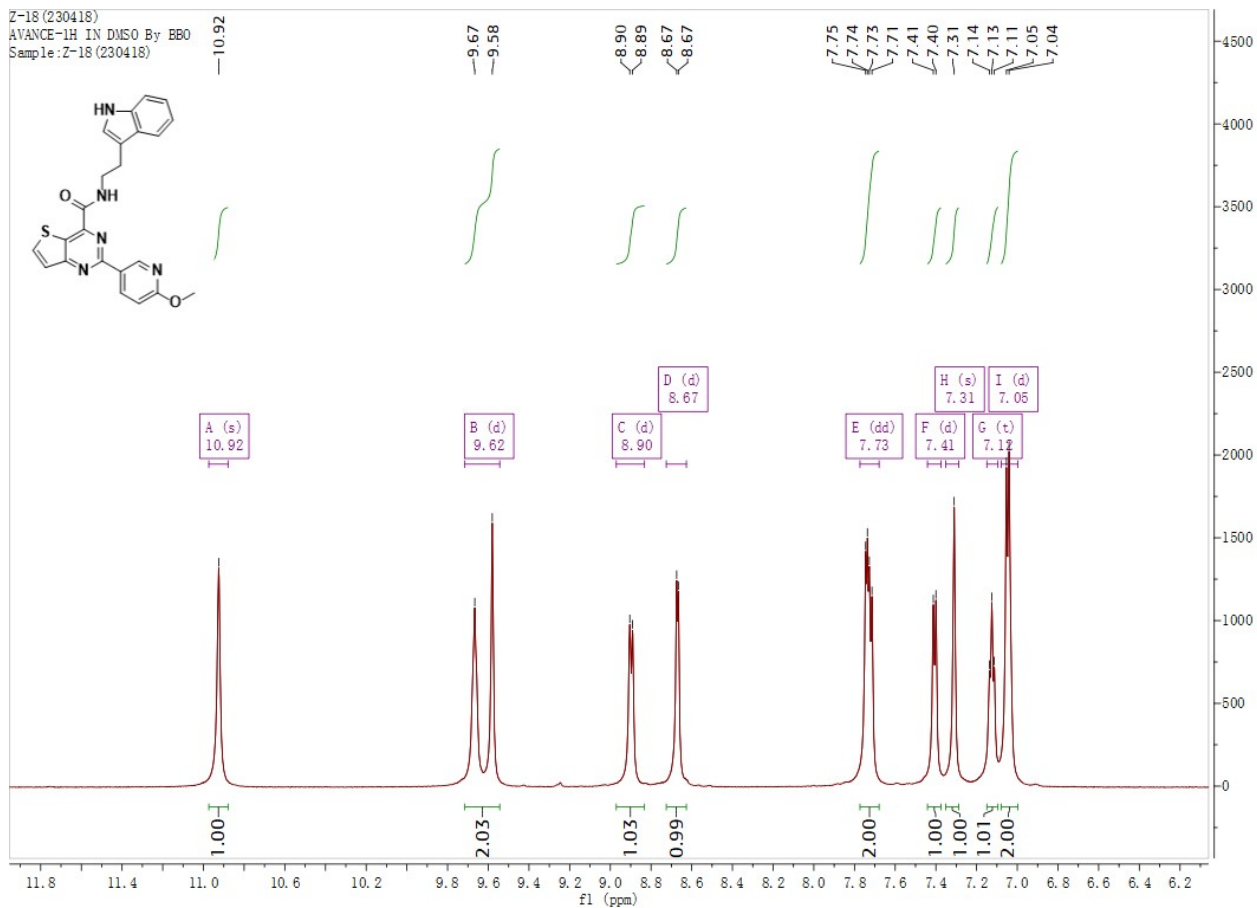

# MS spectrum of compound 8a

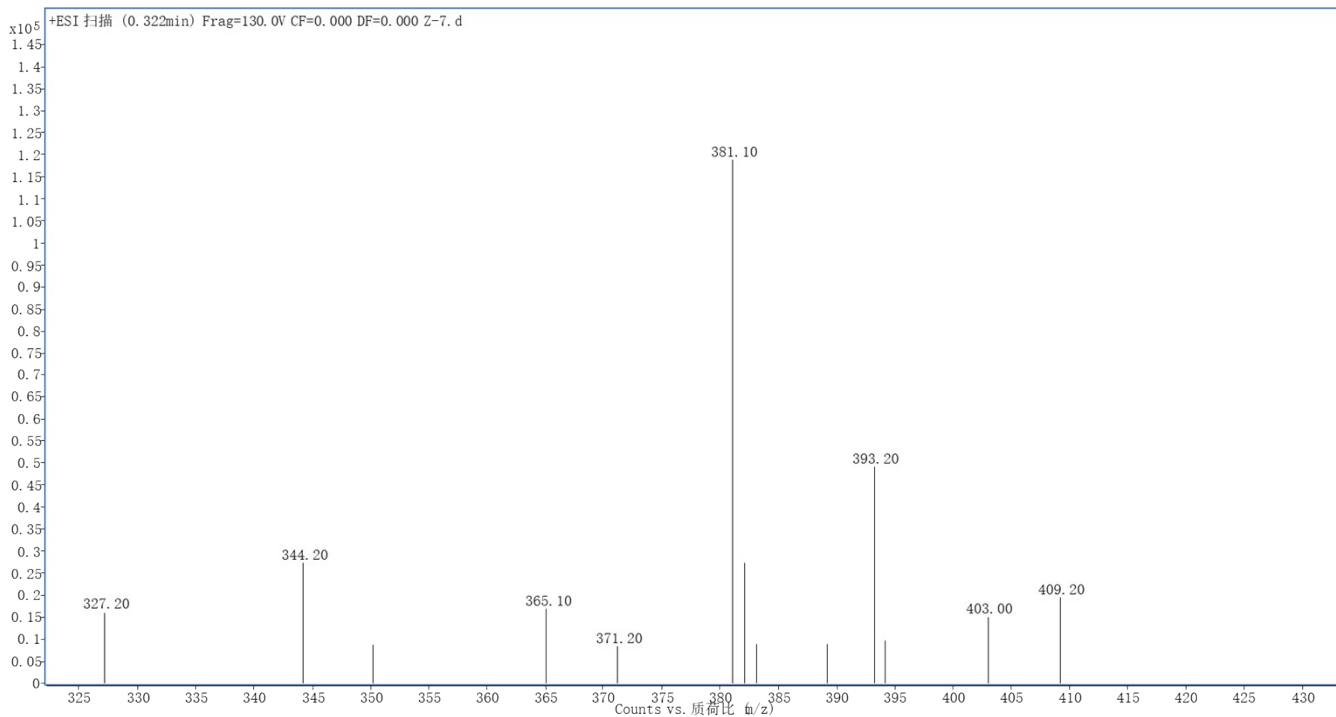

# MS spectrum of compound 9a1

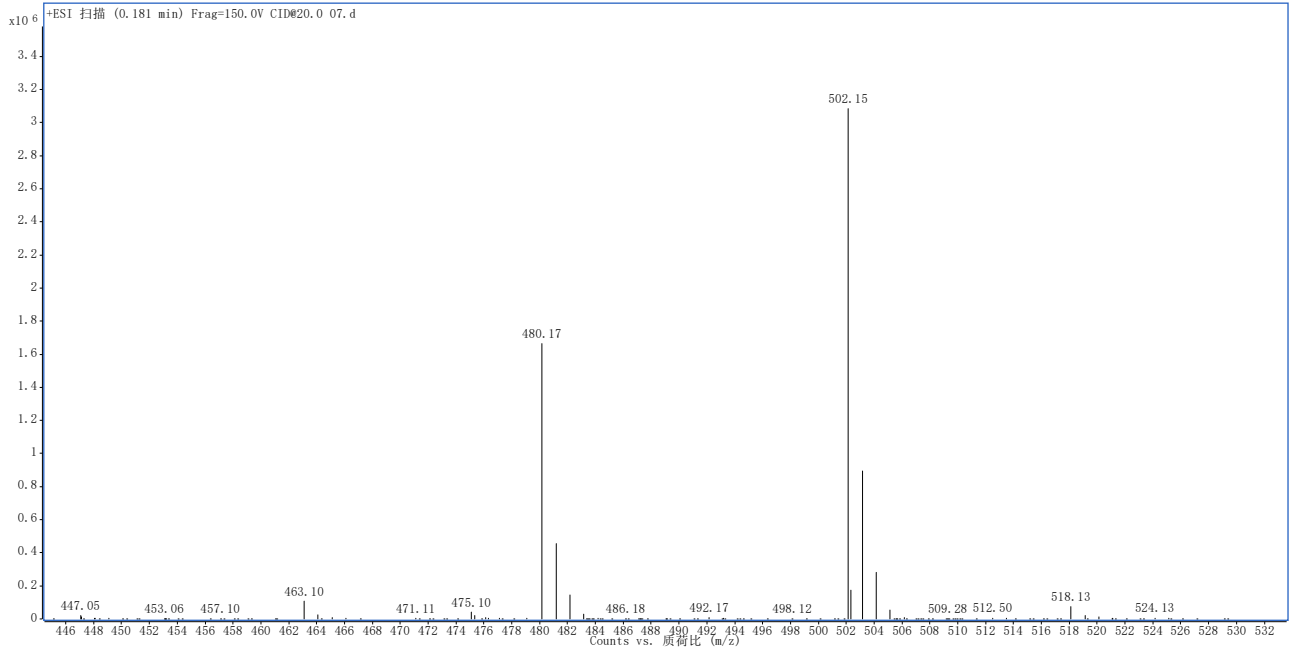

# MS spectrum of compound 9a2

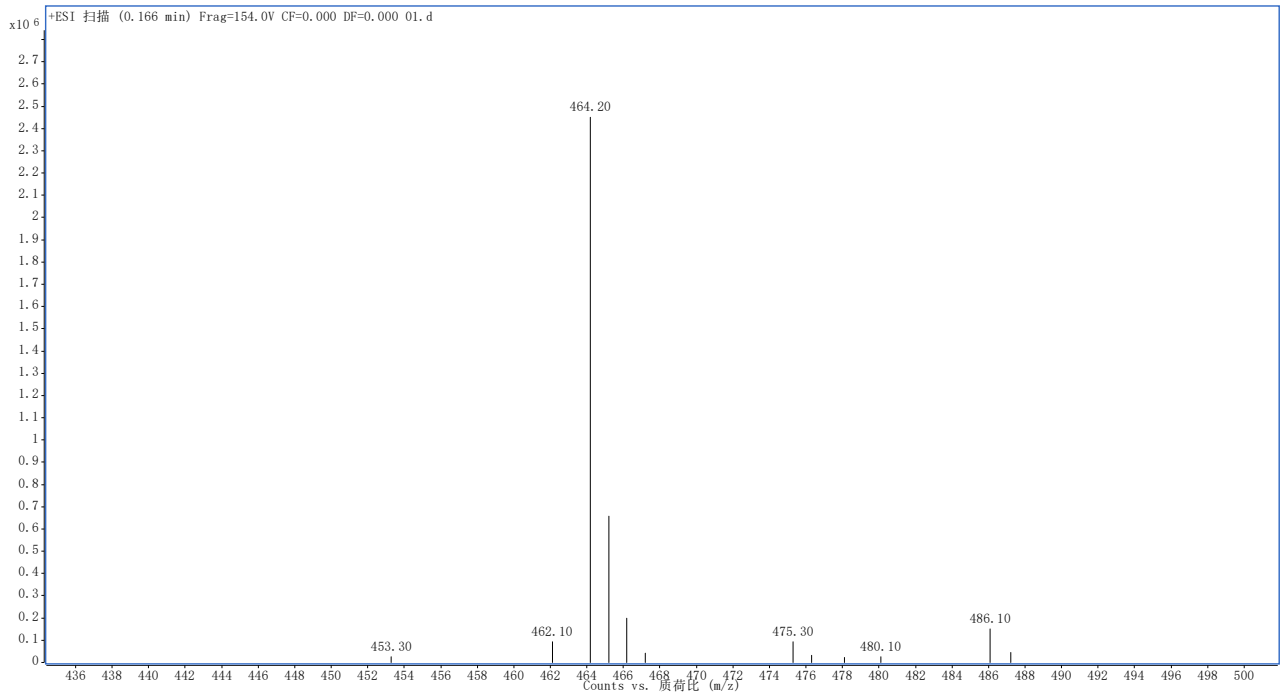

### MS spectrum of compound 9a3

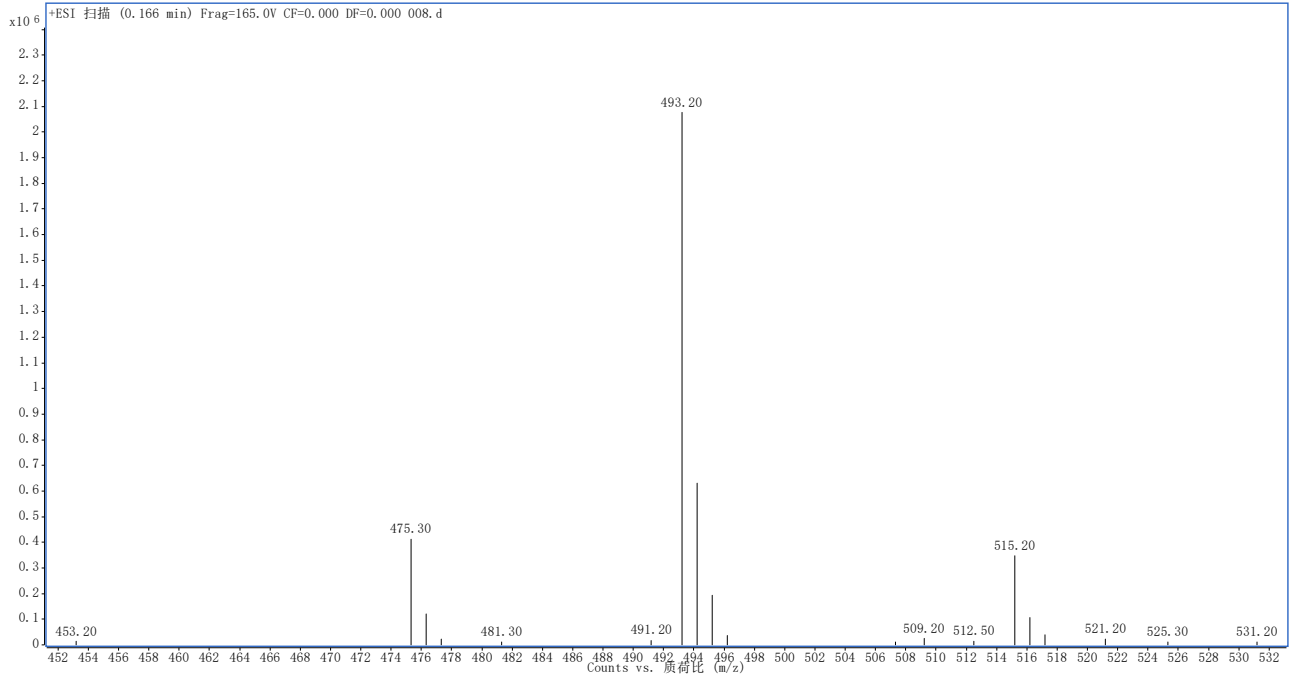

### MS spectrum of compound 9a4

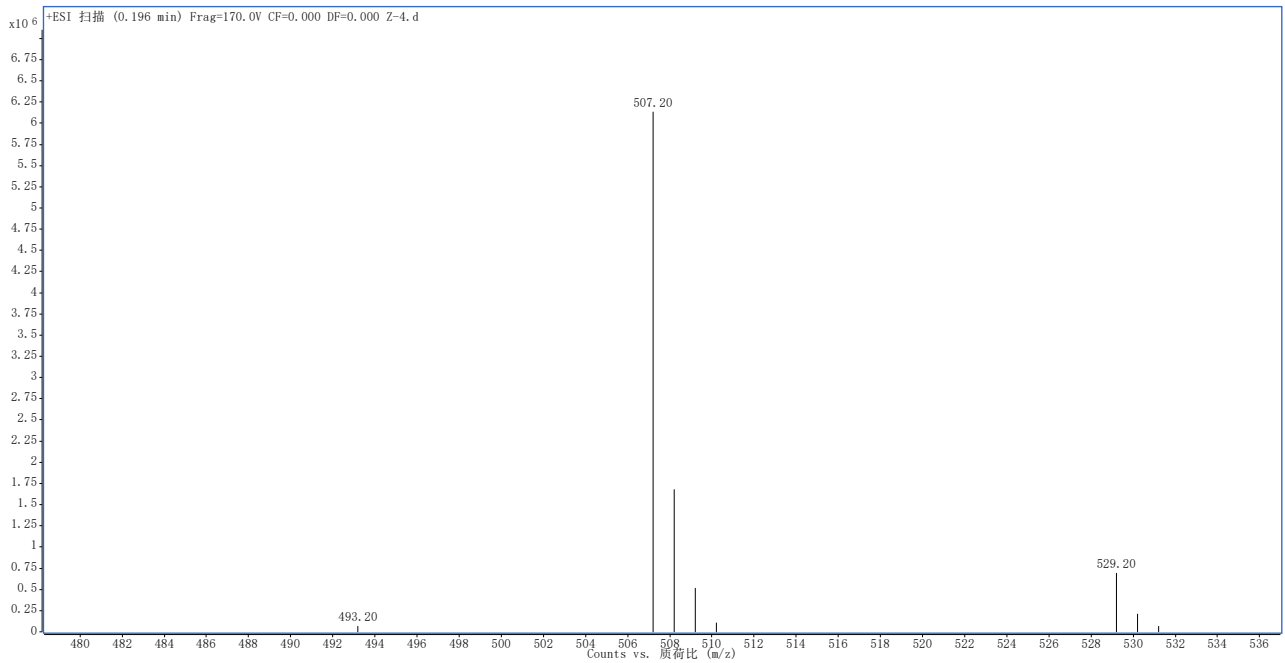

## MS spectrum of compound 9a5

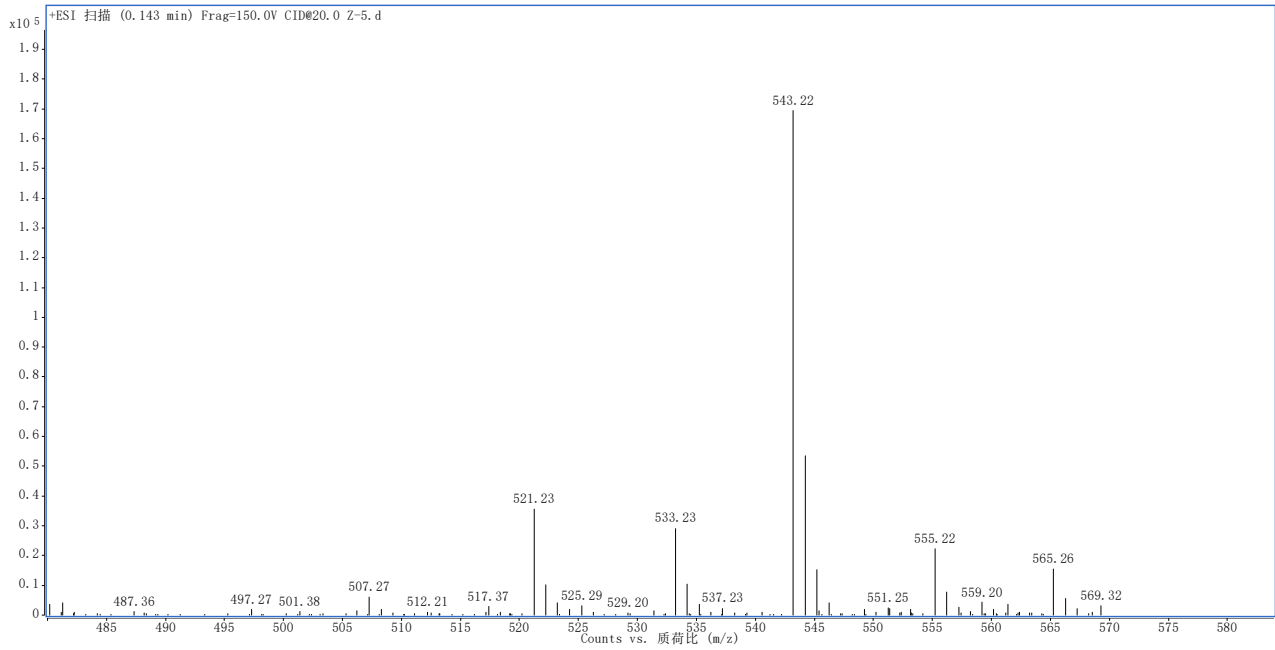

## MS spectrum of compound 9a6

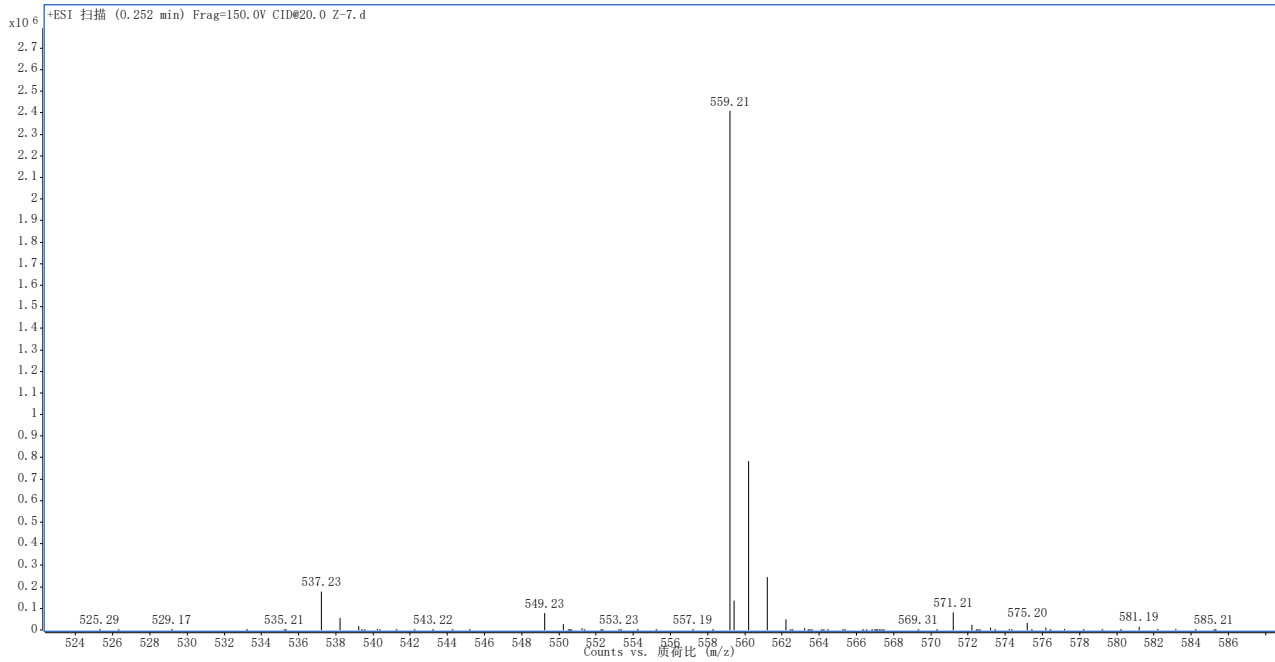

## MS spectrum of compound 12a

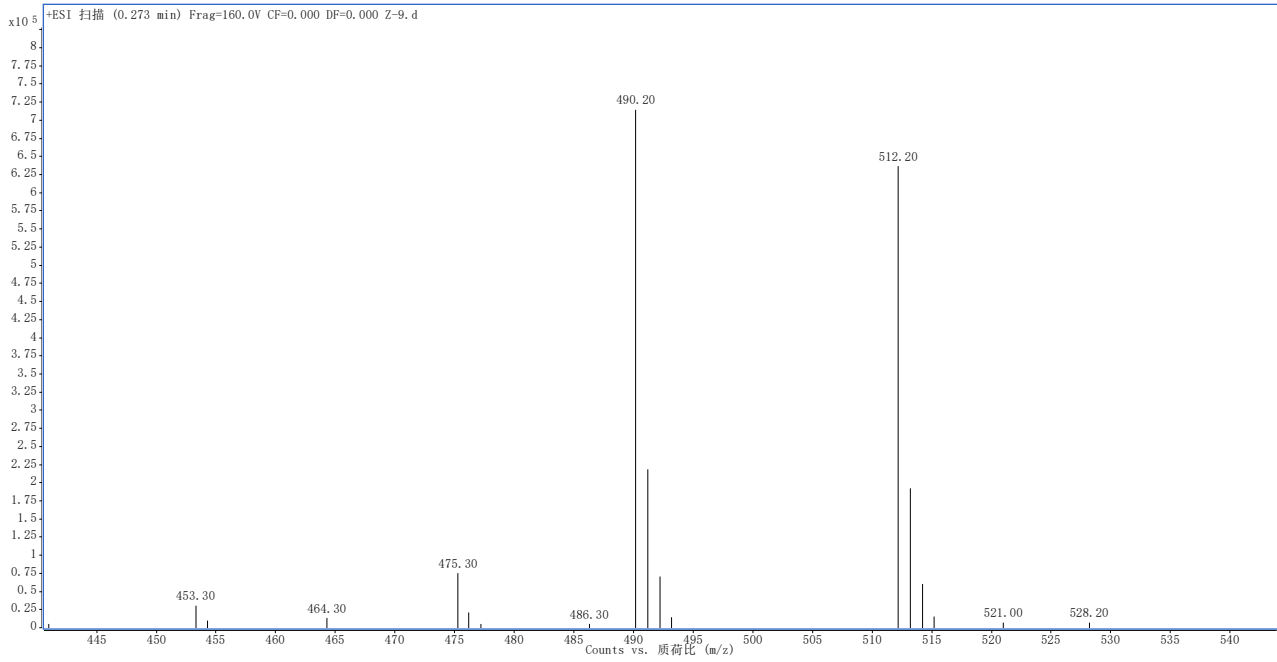

## MS spectrum of compound 12b

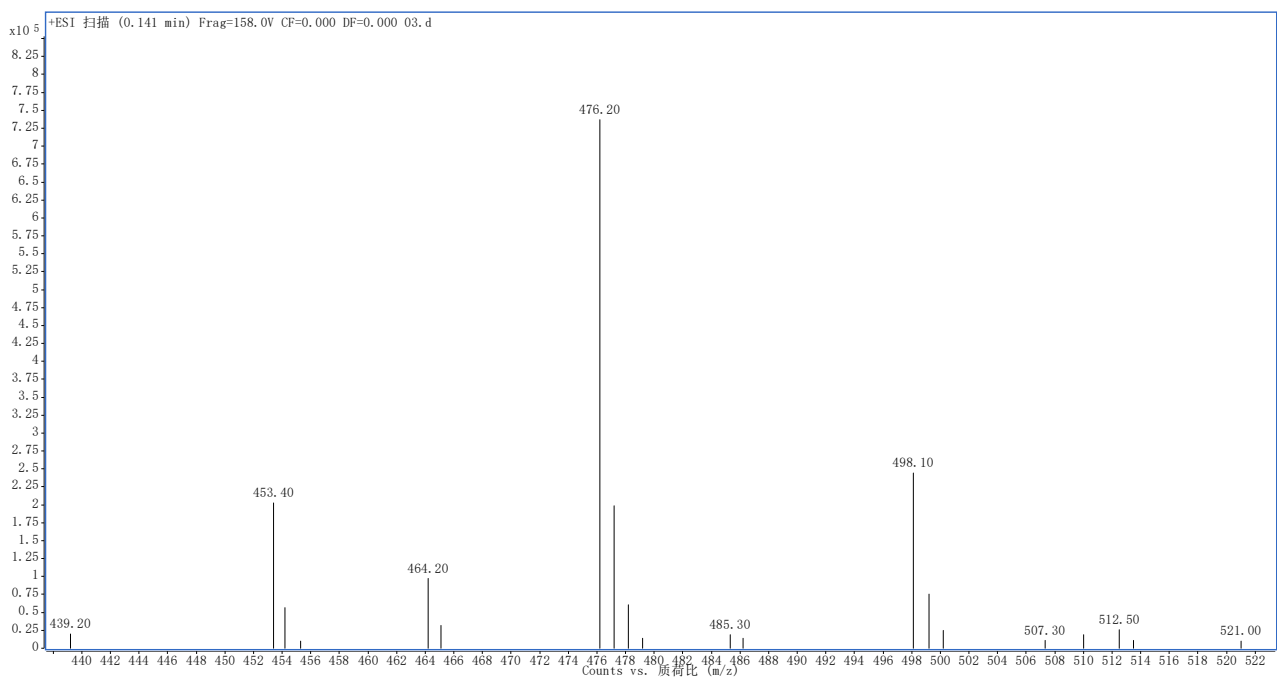



### MS spectrum of compound 12c

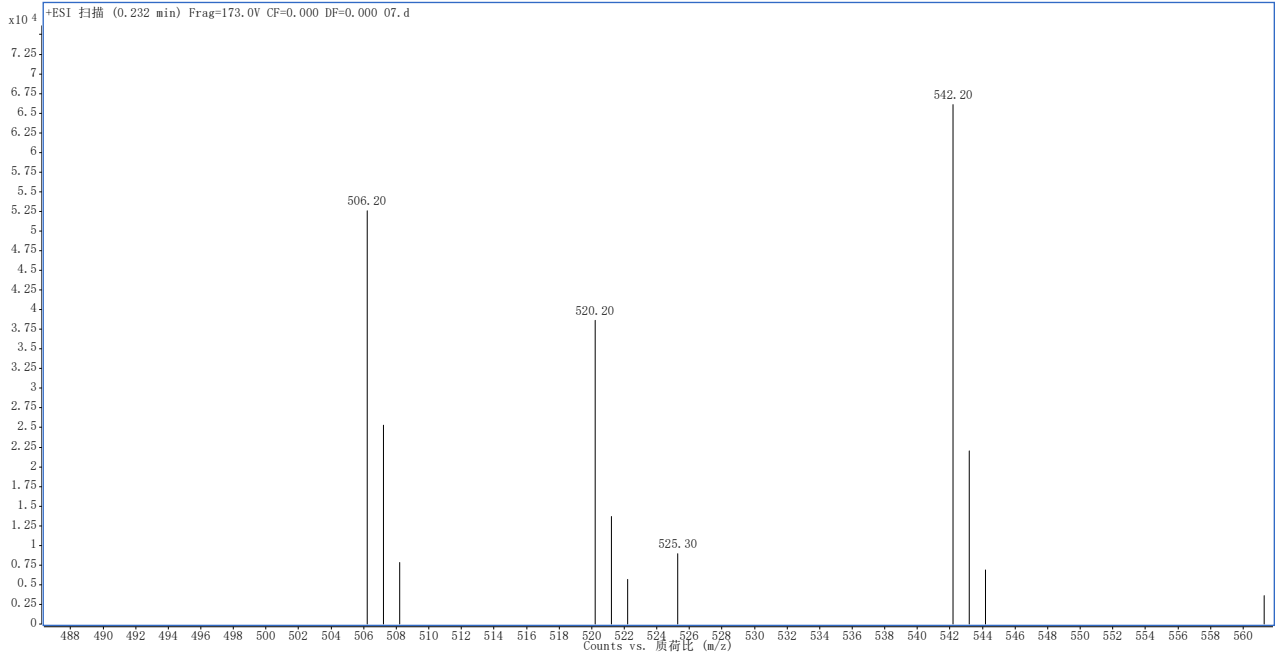

### MS spectrum of compound 12d

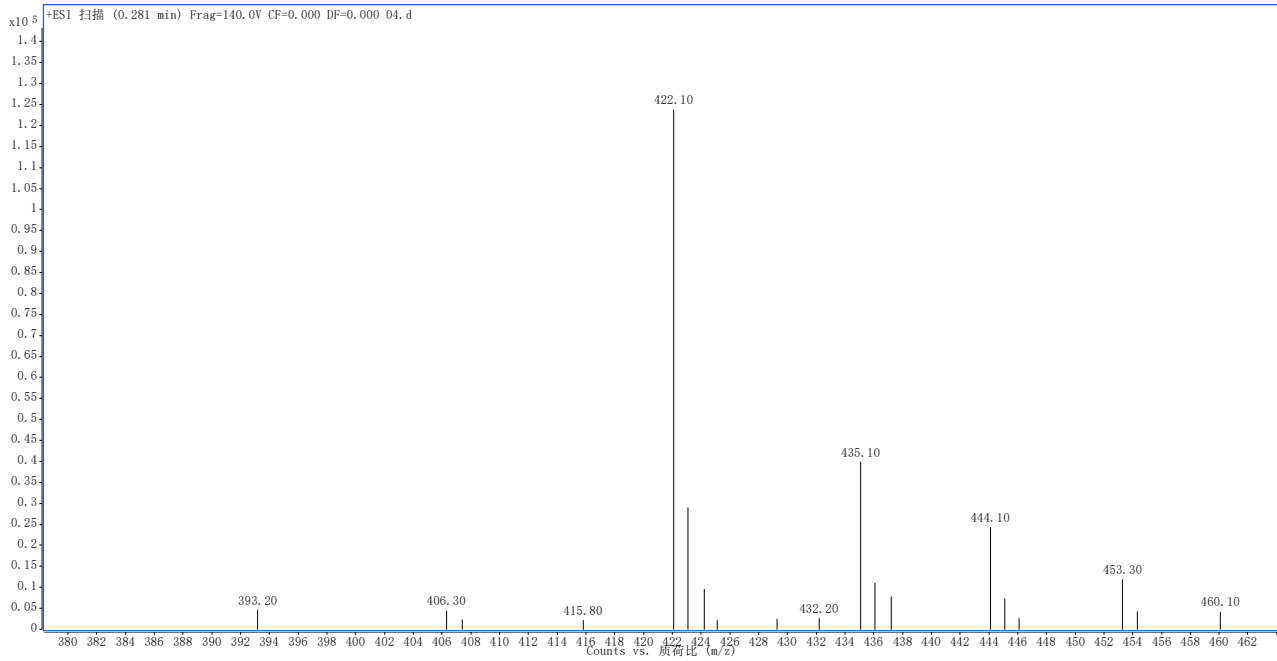

### MS spectrum of compound 8b

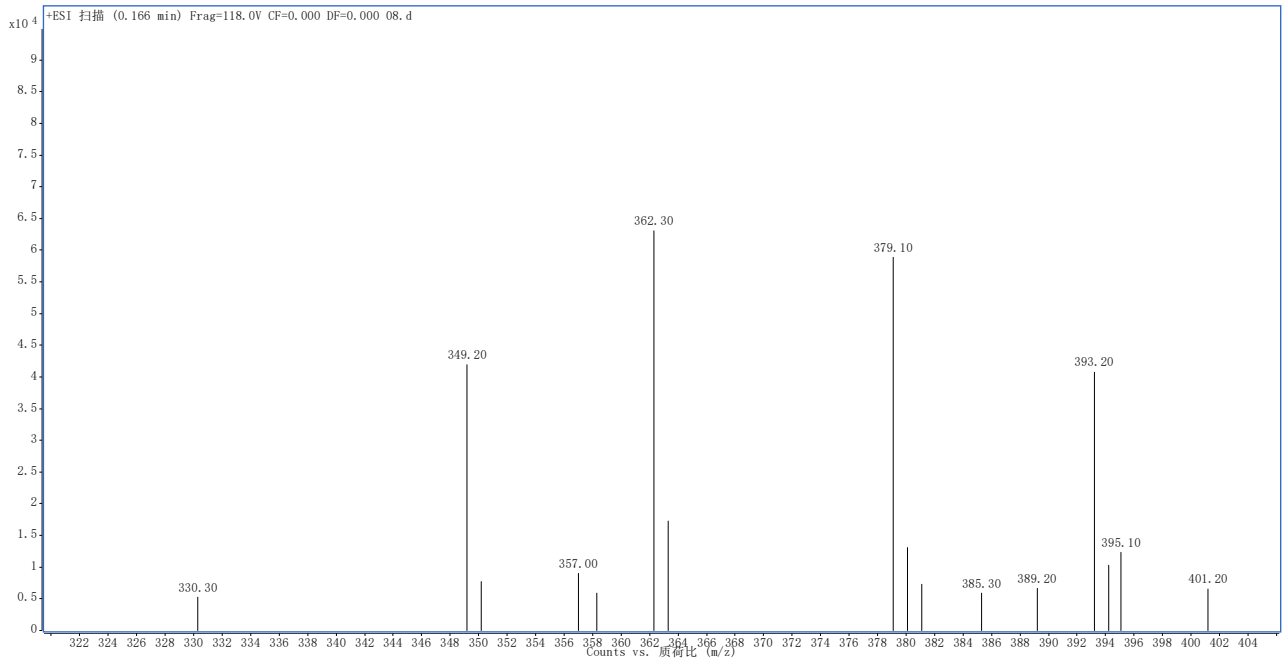

### MS spectrum of compound 12e

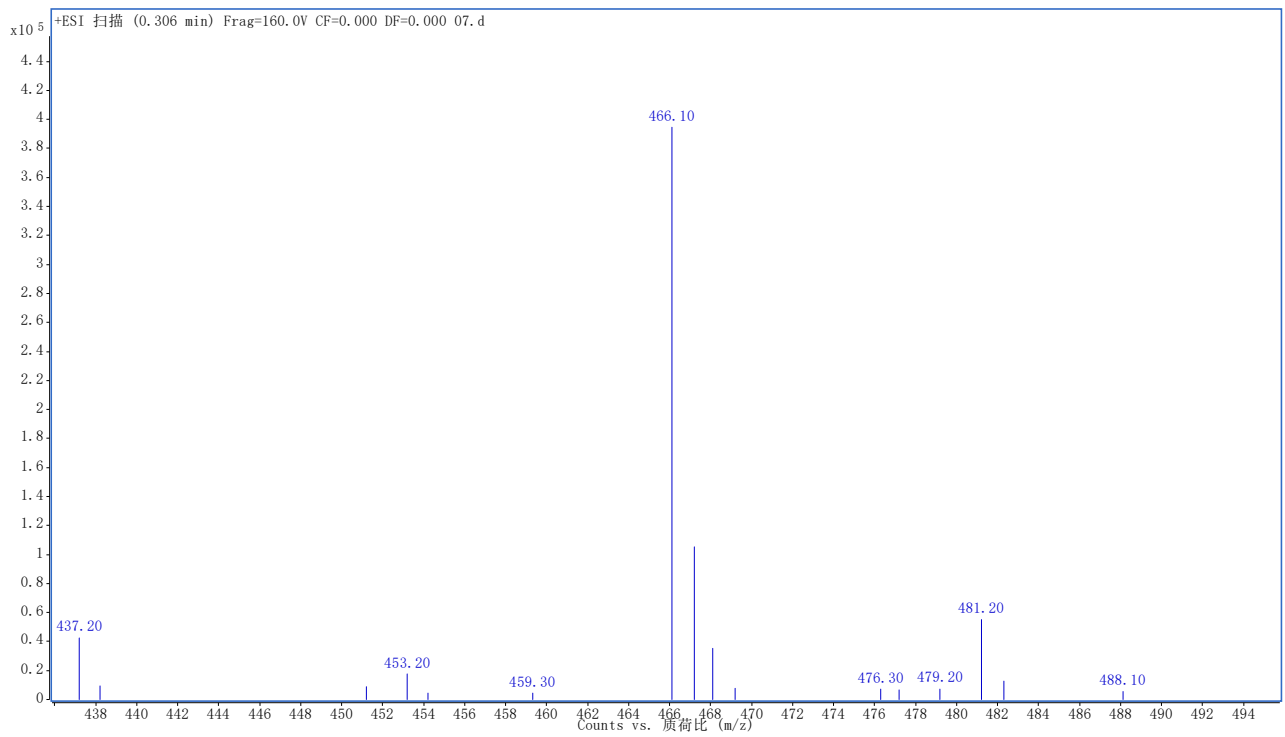

### MS spectrum of compound 12f

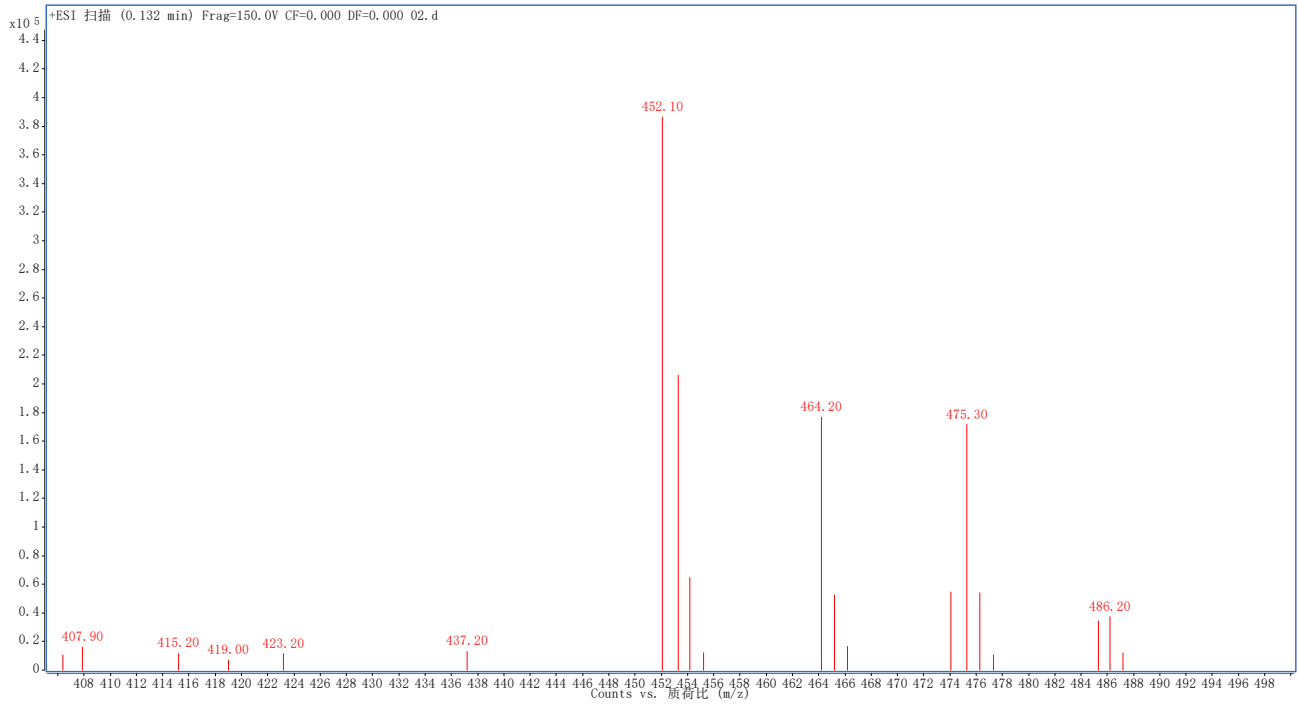

### MS spectrum of compound 12g

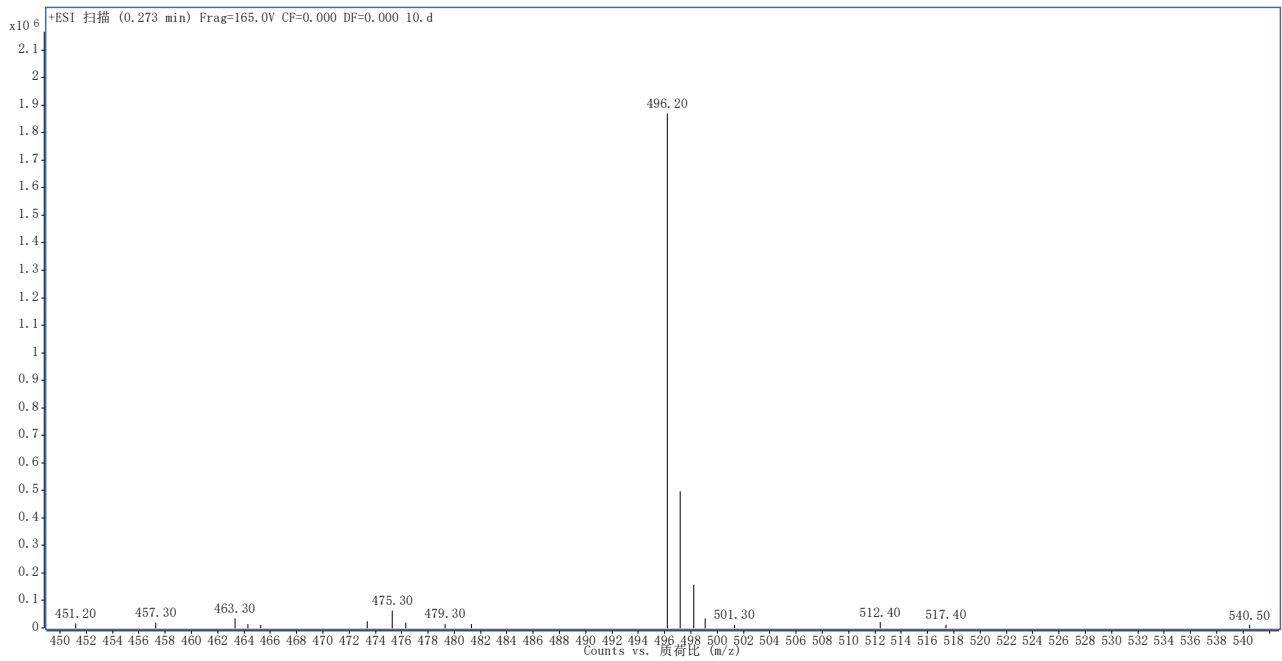

## MS spectrum of compound 12h

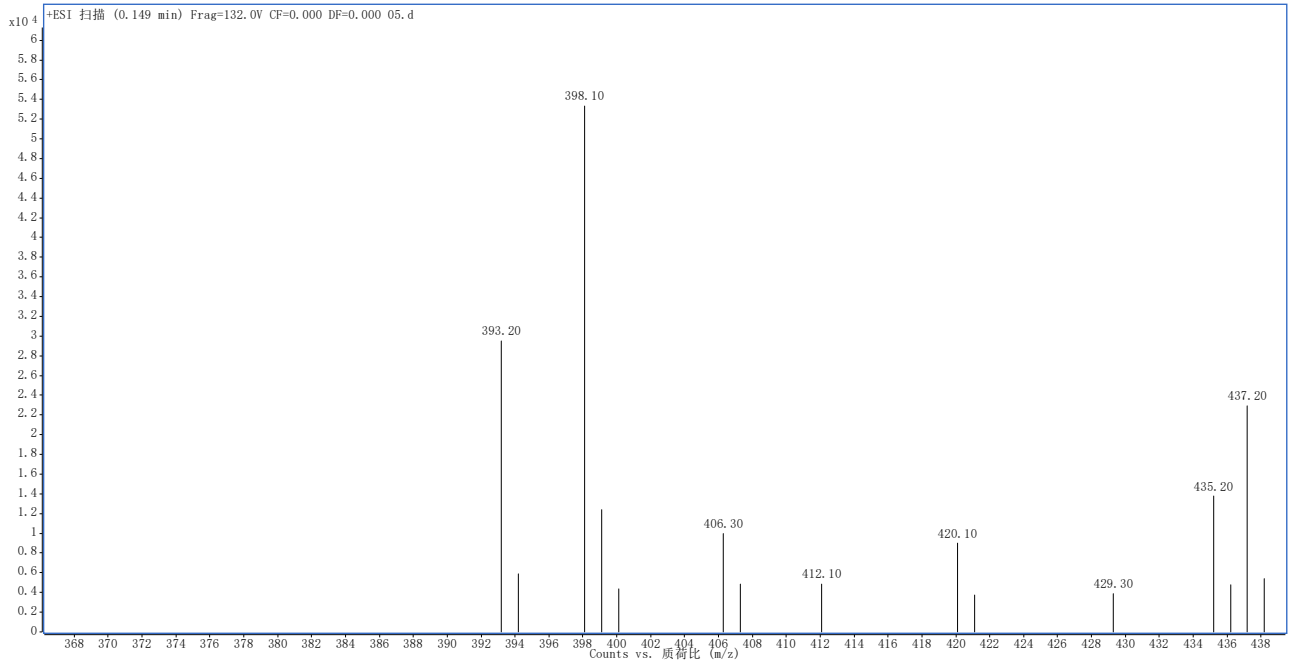

## MS spectrum of compound 8c

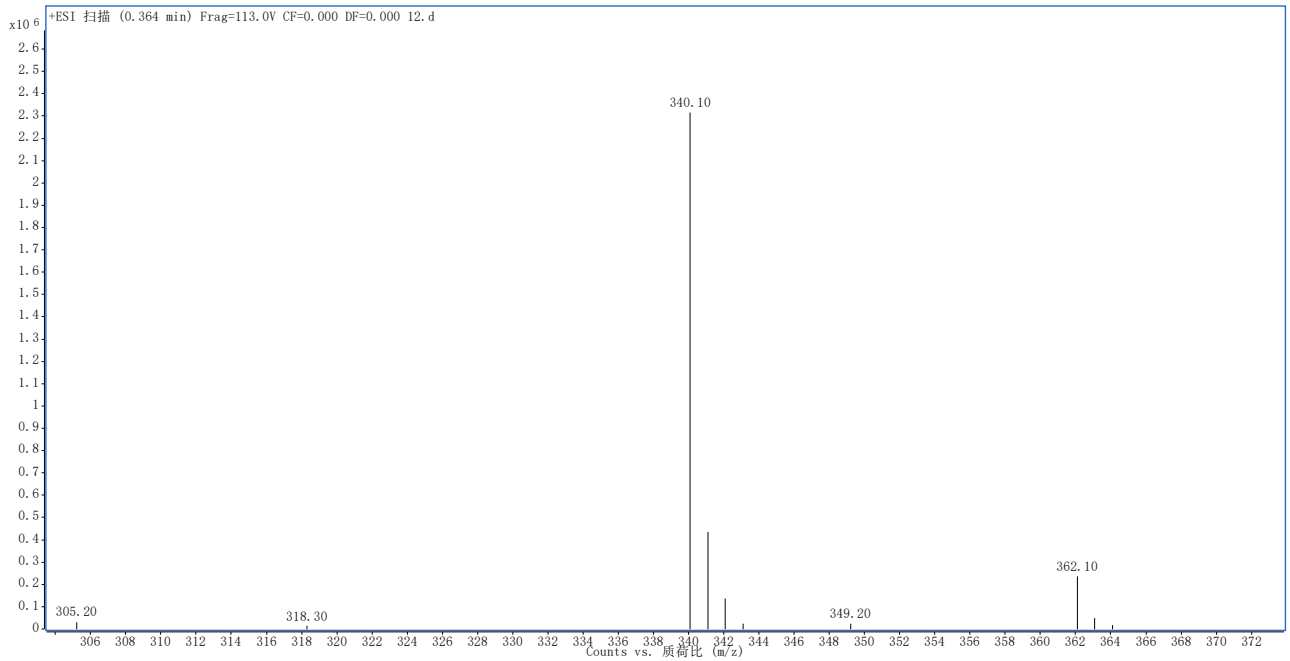

### MS spectrum of compound 12i

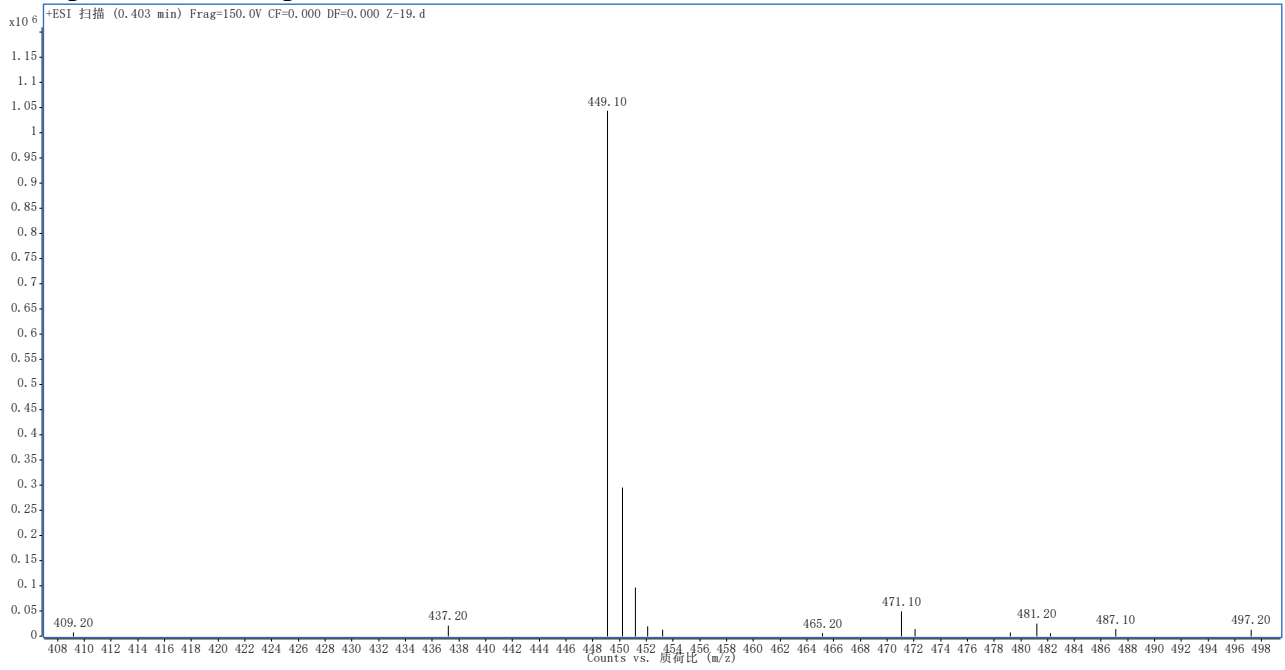

### MS spectrum of compound 12j

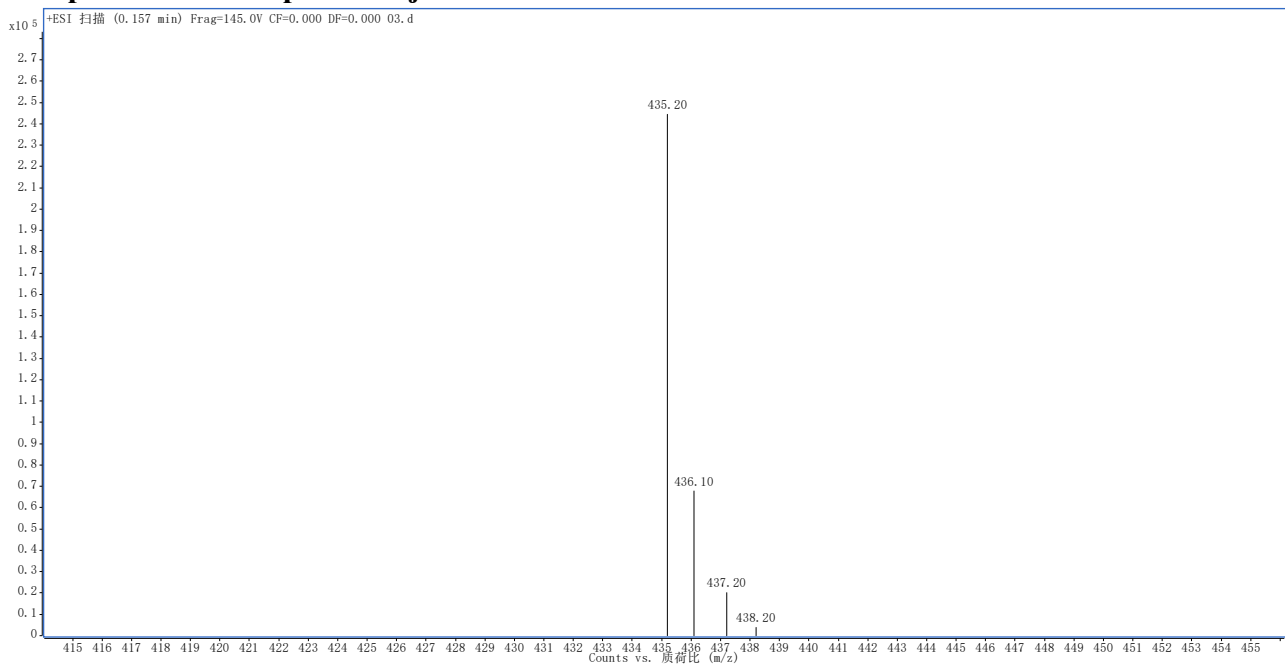



## MS spectrum of compound 12k

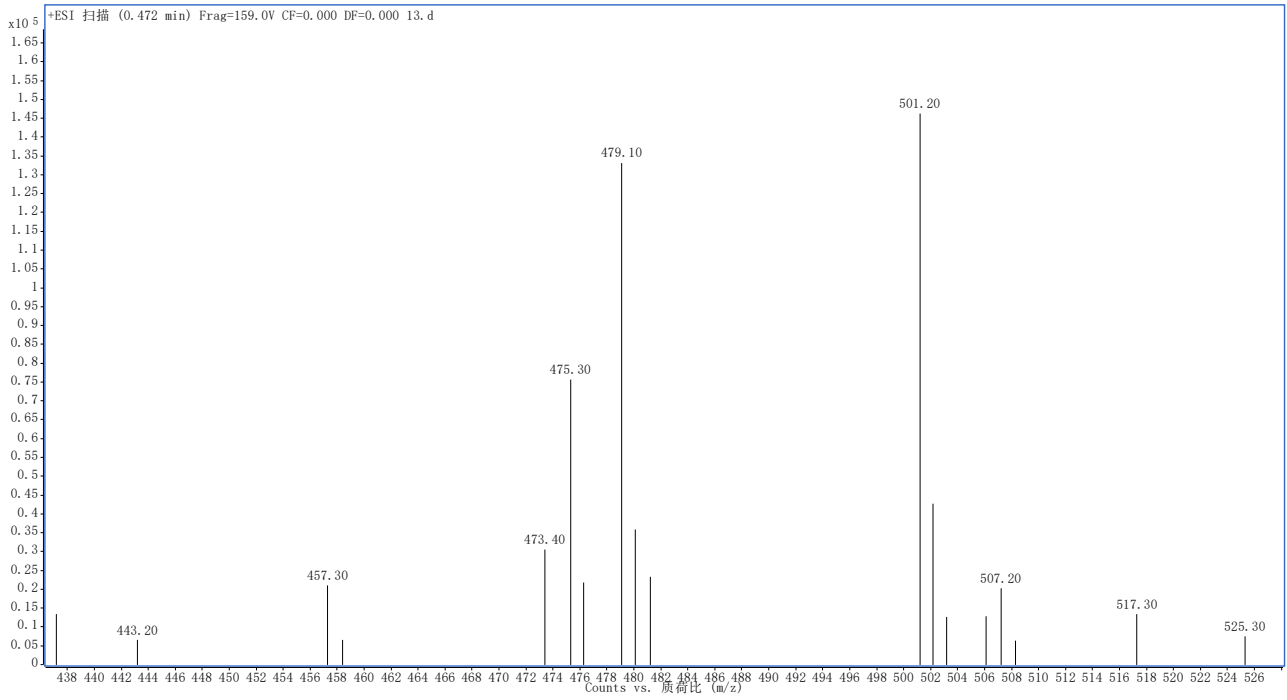

## MS spectrum of compound 12l

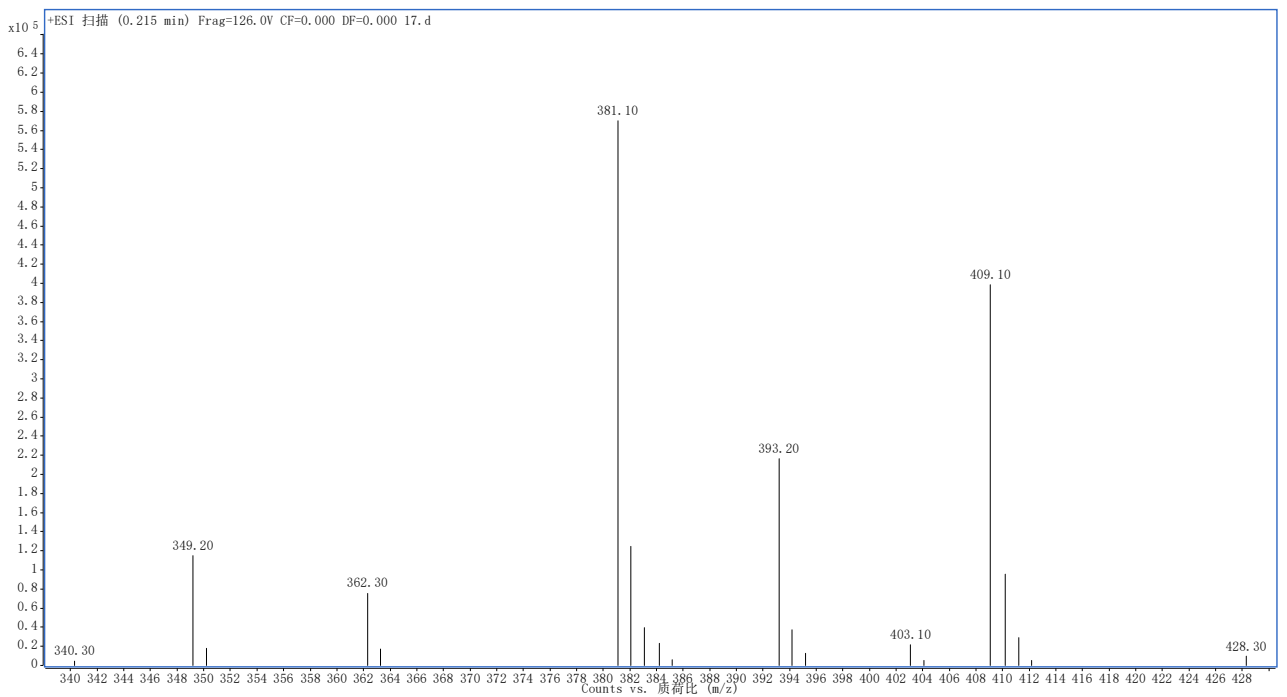

## MS spectrum of compound 8d

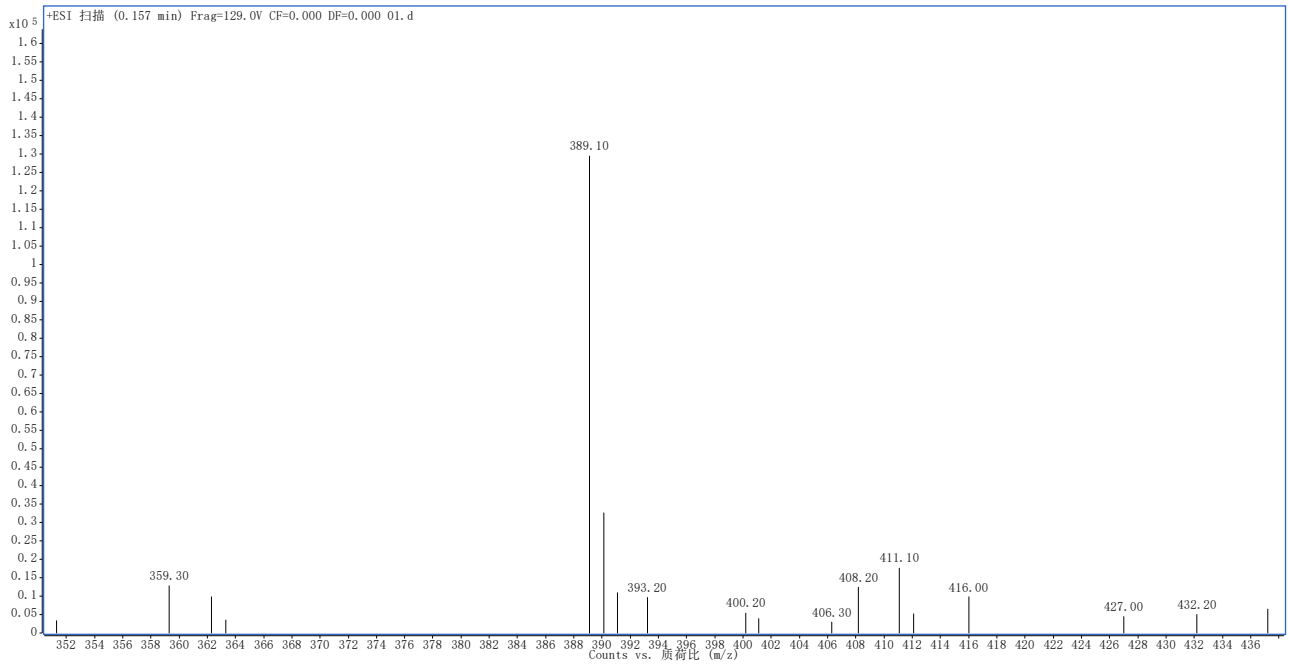

## MS spectrum of compound 12m

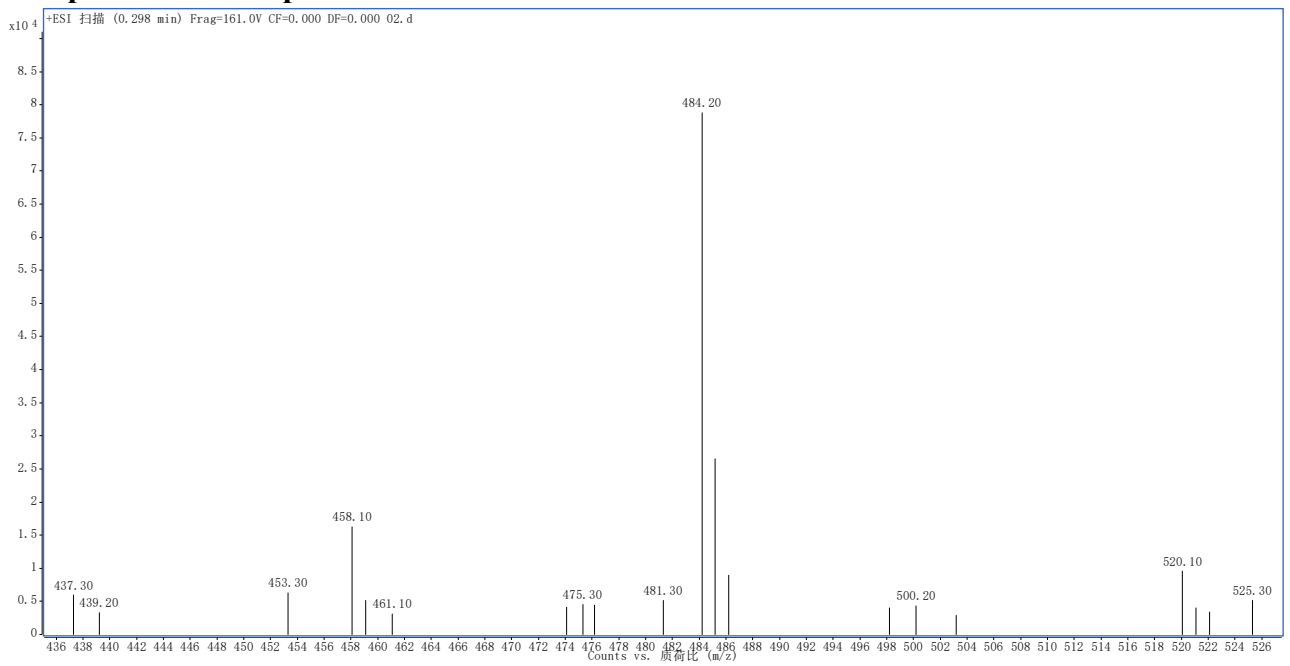

### MS spectrum of compound 12n

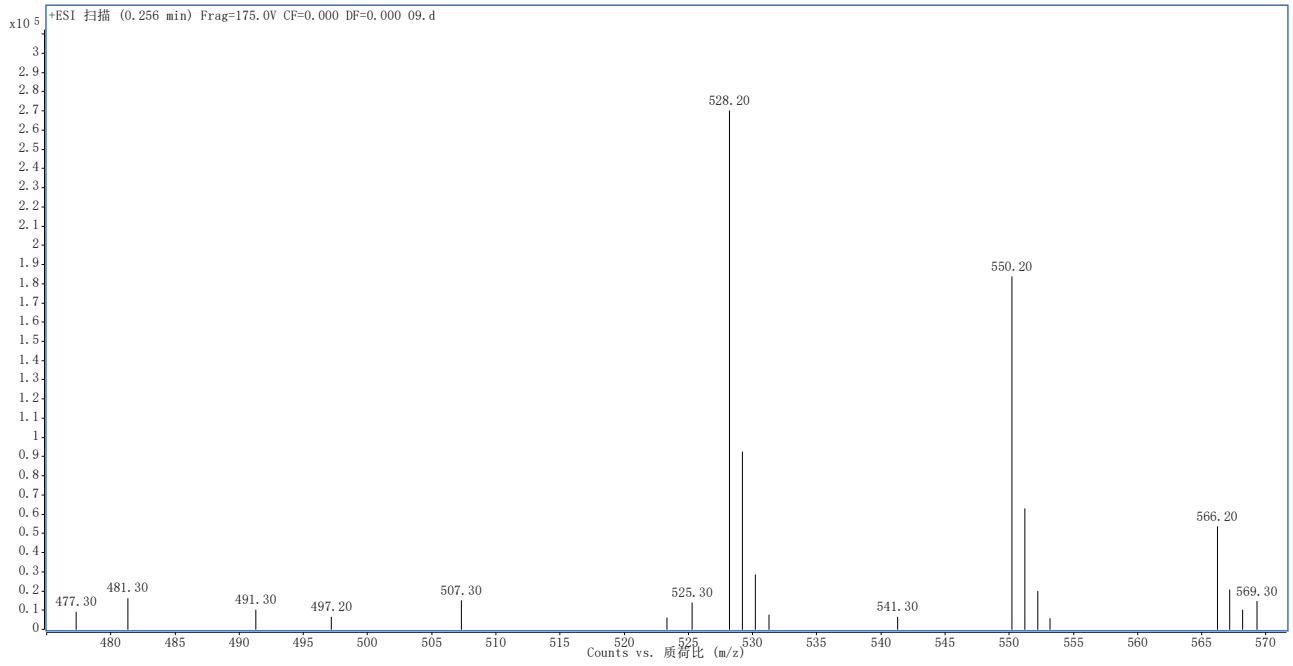

### MS spectrum of compound 12o

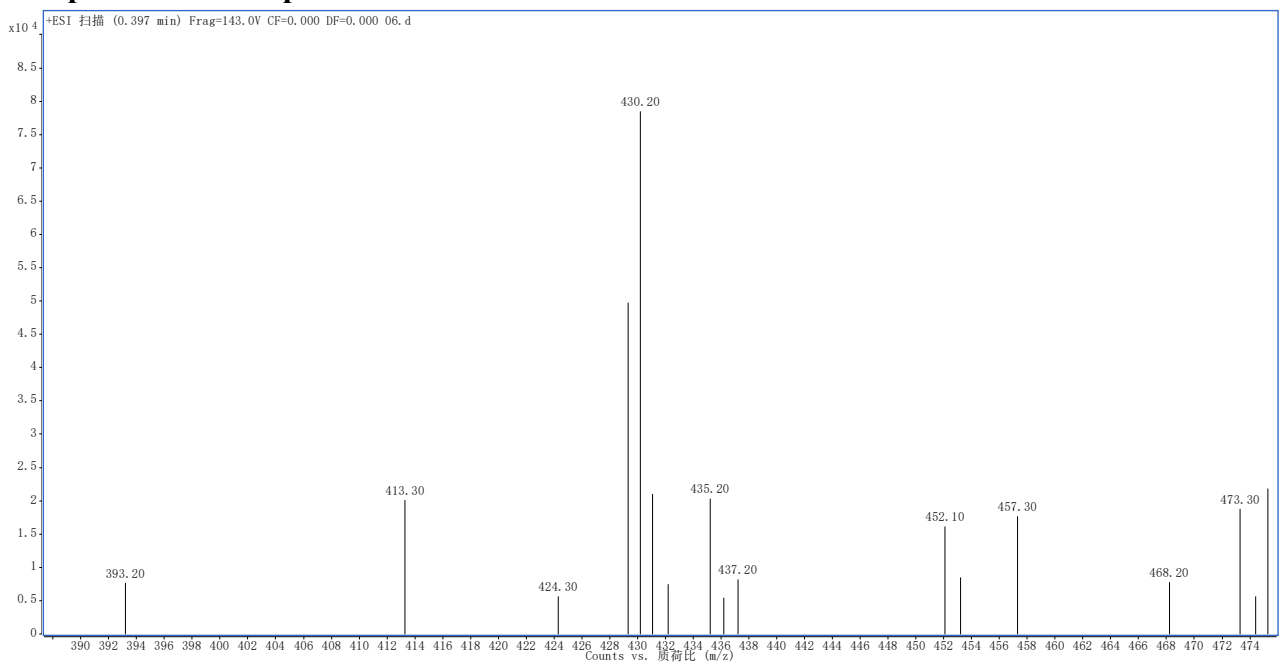

**IR spectrum of compound 8b**

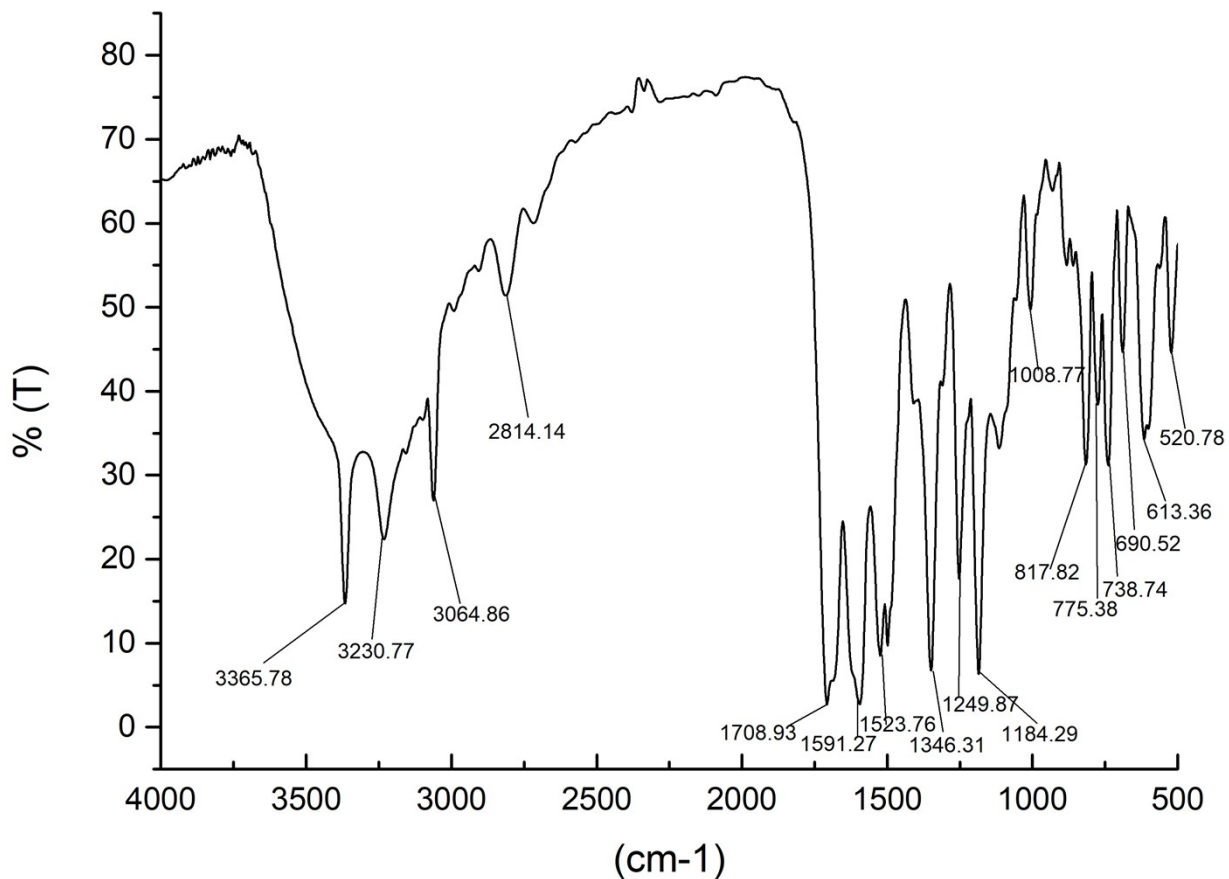

**IR spectrum of compound 9a2**

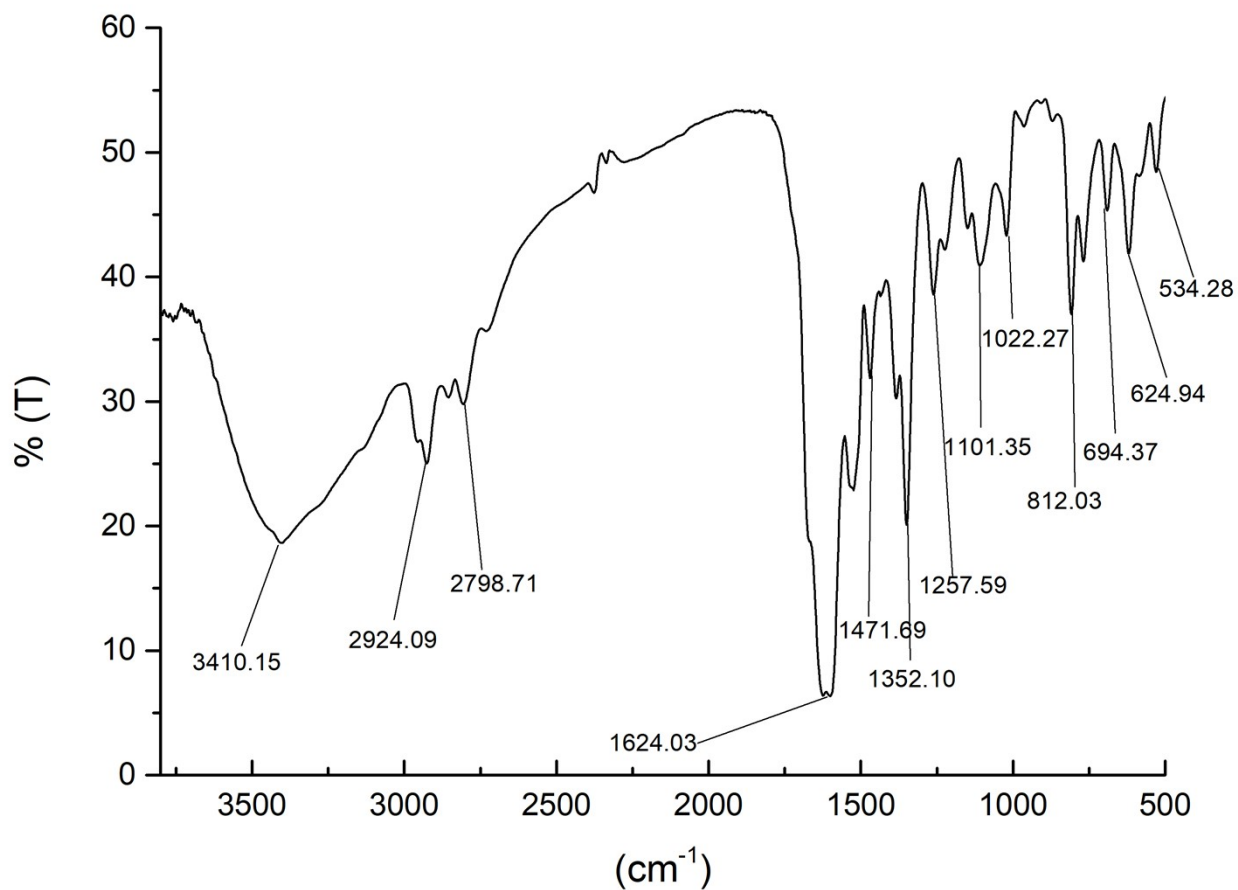

IR spectrum of compound 9a3

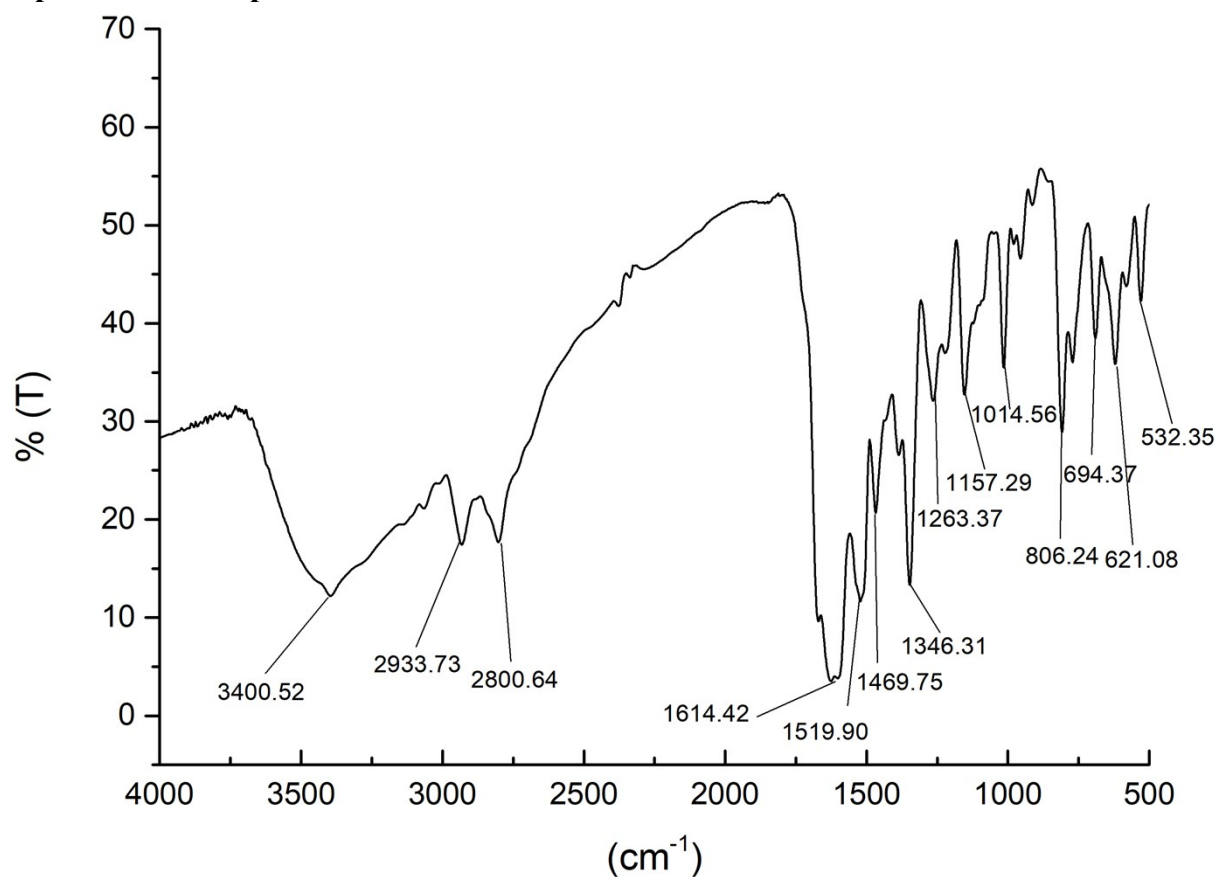

IR spectrum of compound 12a

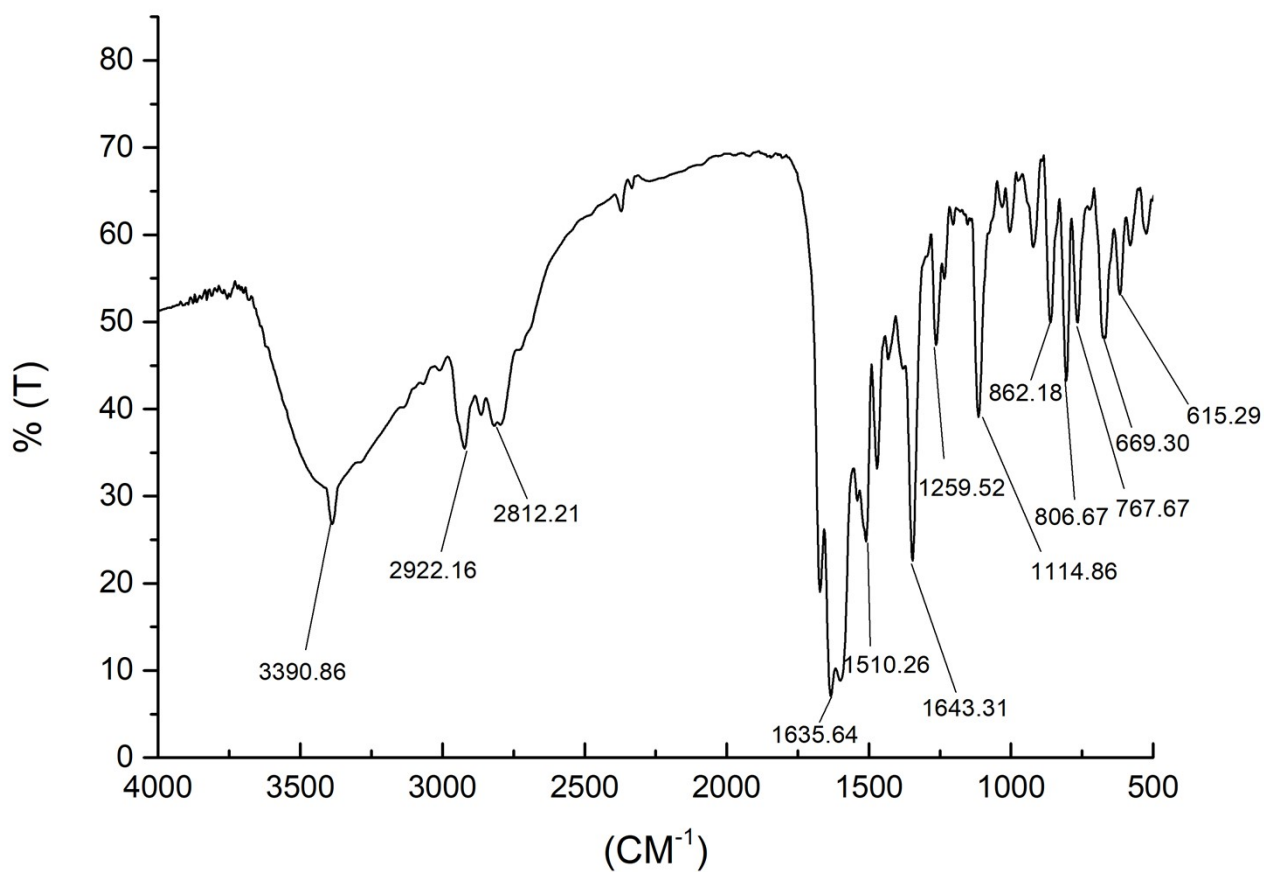



**IR spectrum of compound 12e**

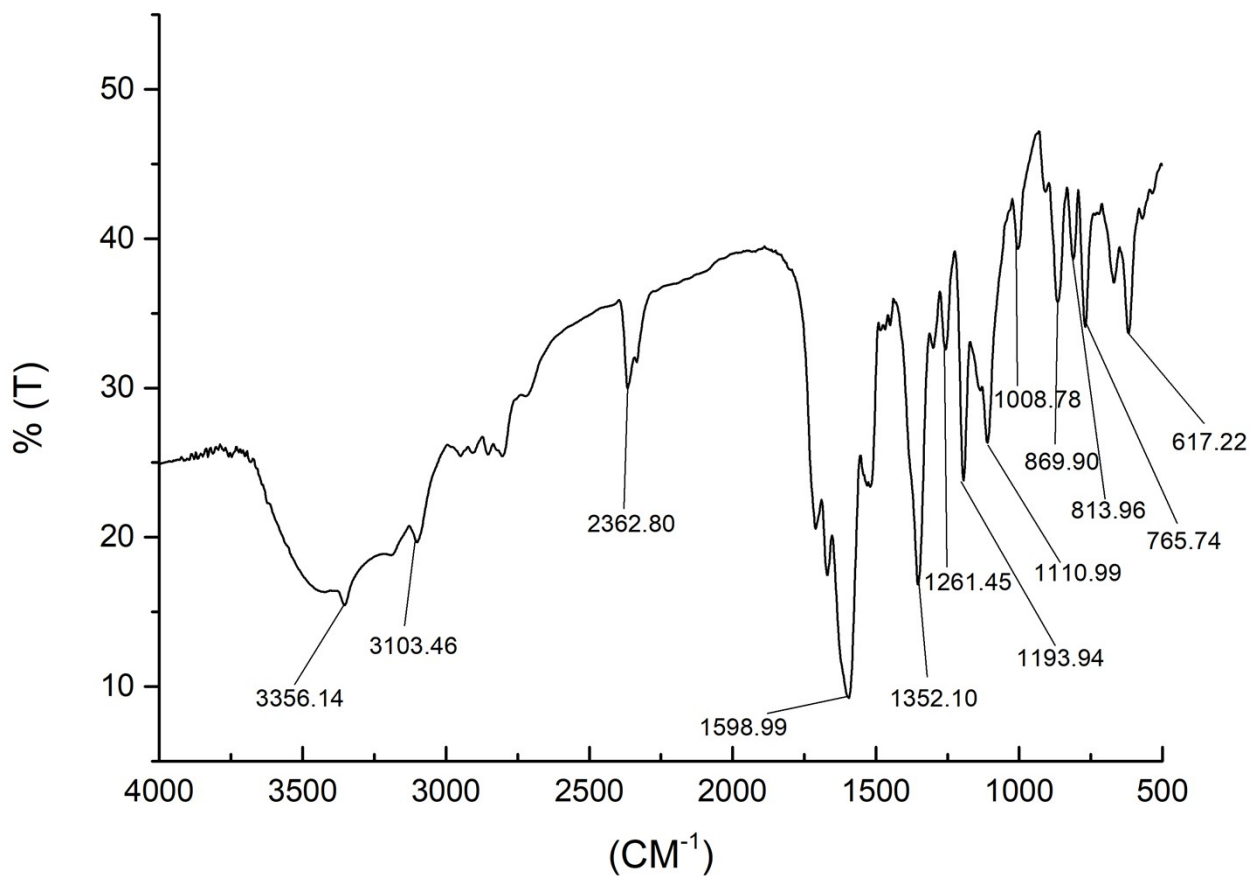

**IR spectrum of compound 12i**

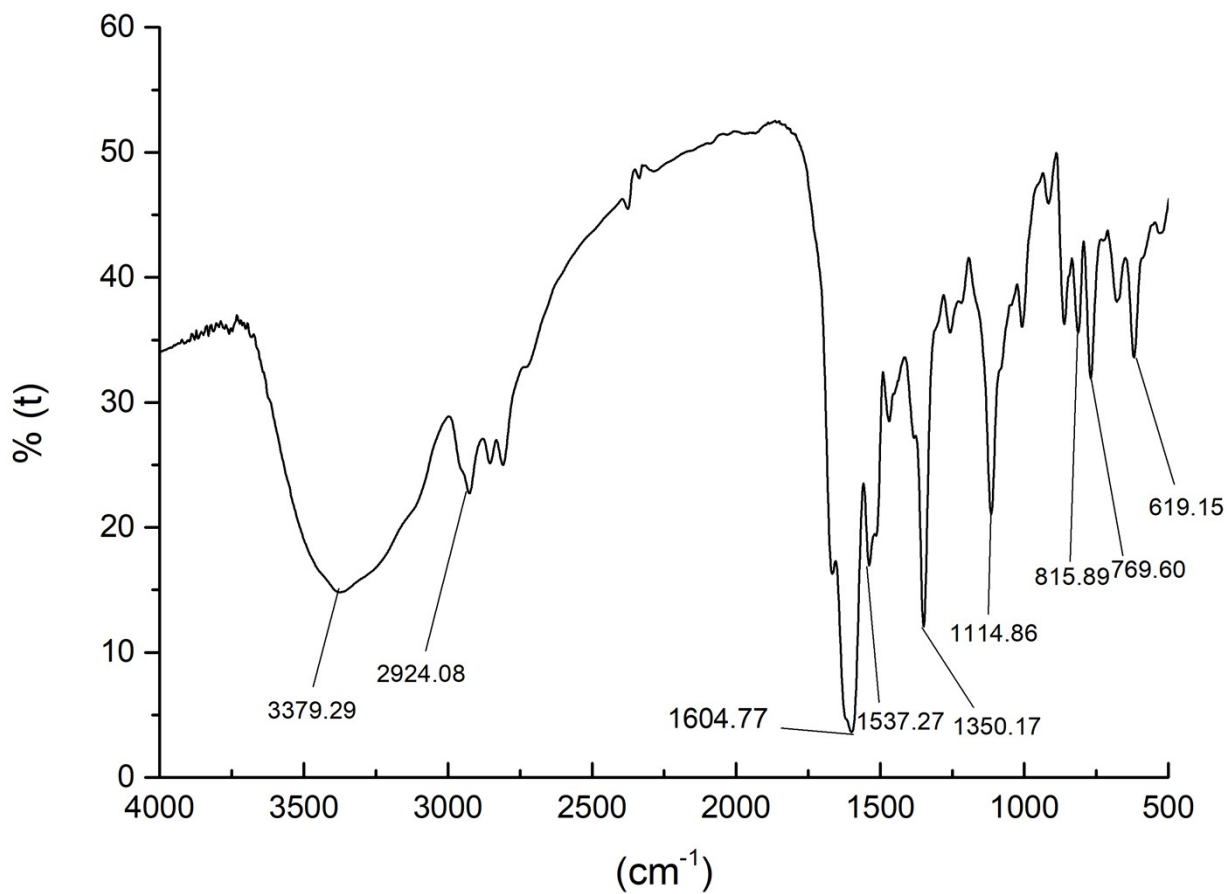

**IR spectrum of compound 12j**

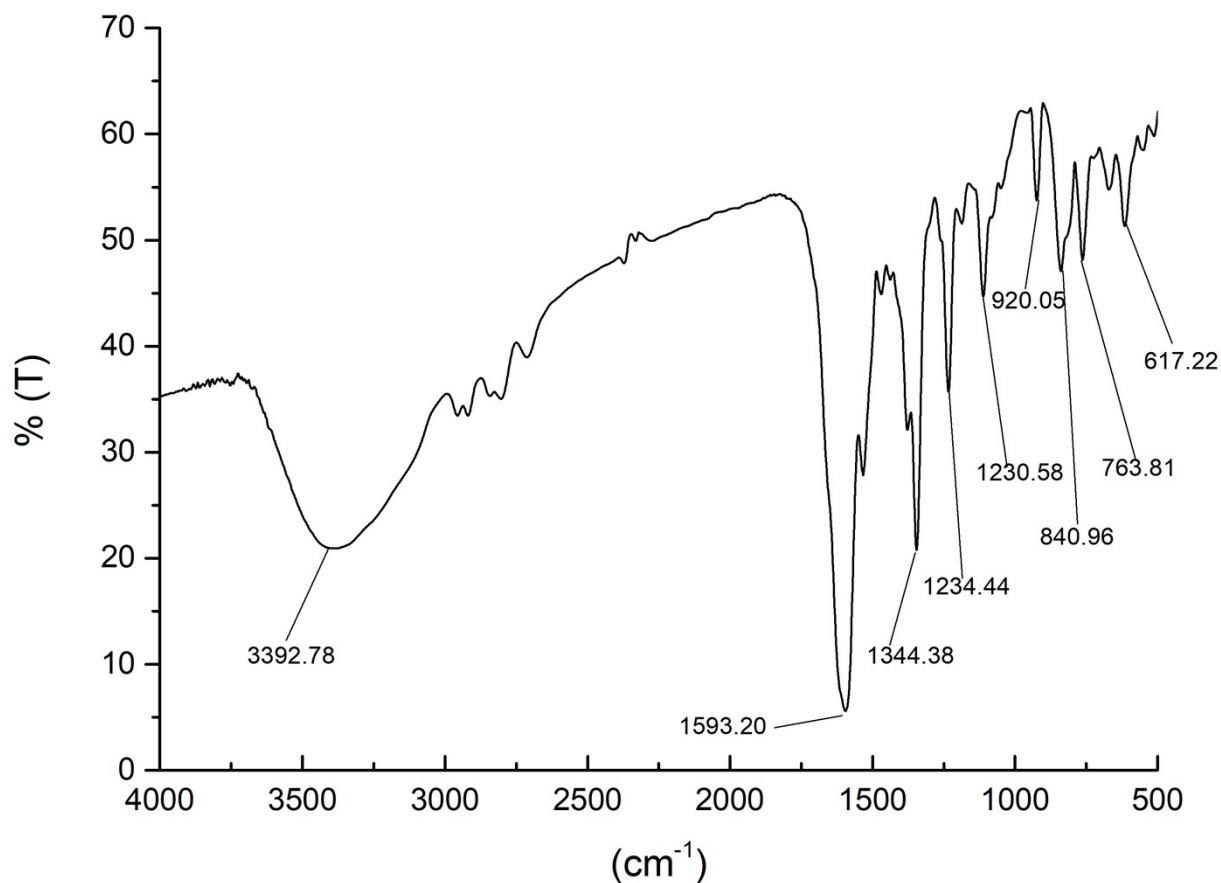

**IR spectrum of compound 12n**

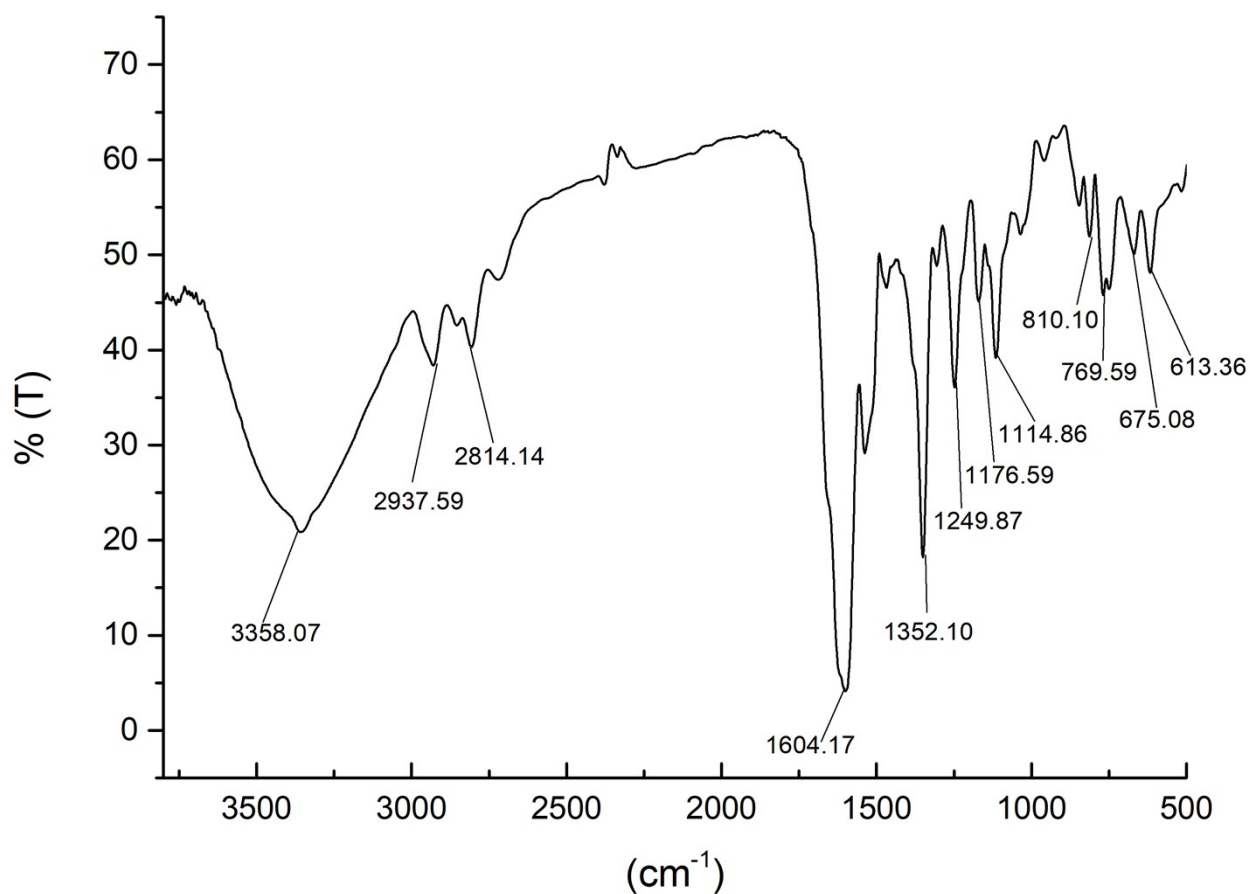

### <sup>13</sup>C NMR spectrum of compound 8b

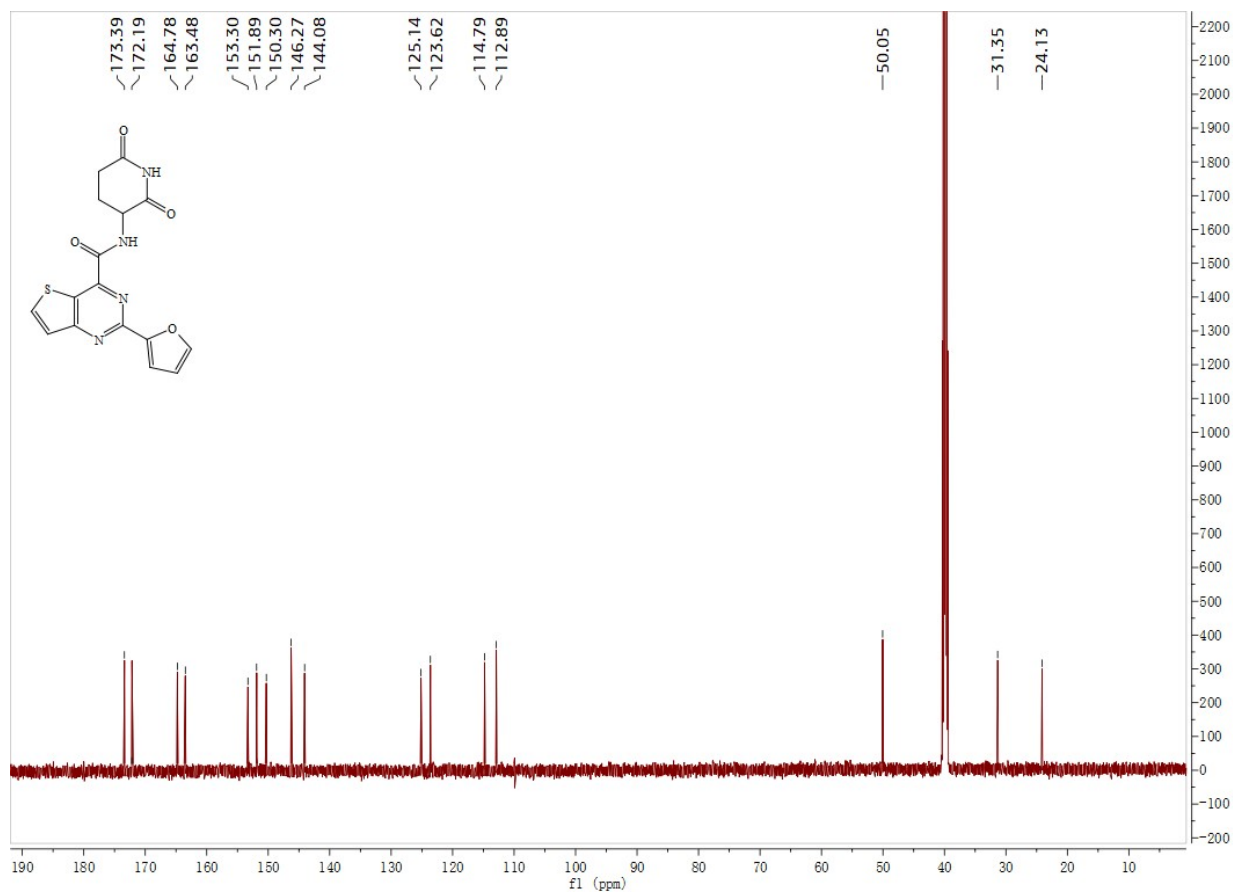

### <sup>13</sup>C NMR spectrum of compound 9a6

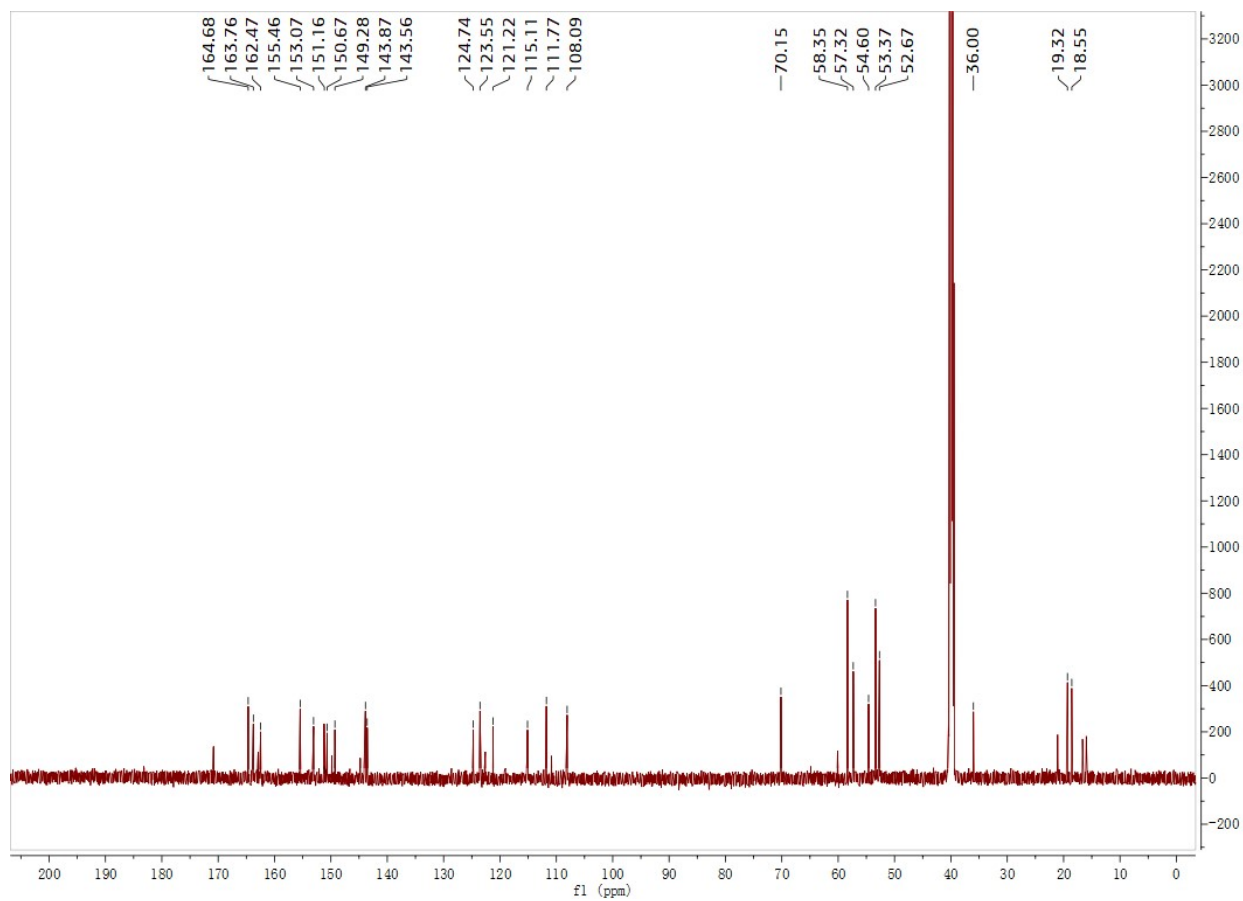

### <sup>13</sup>C NMR spectrum of compound 12e

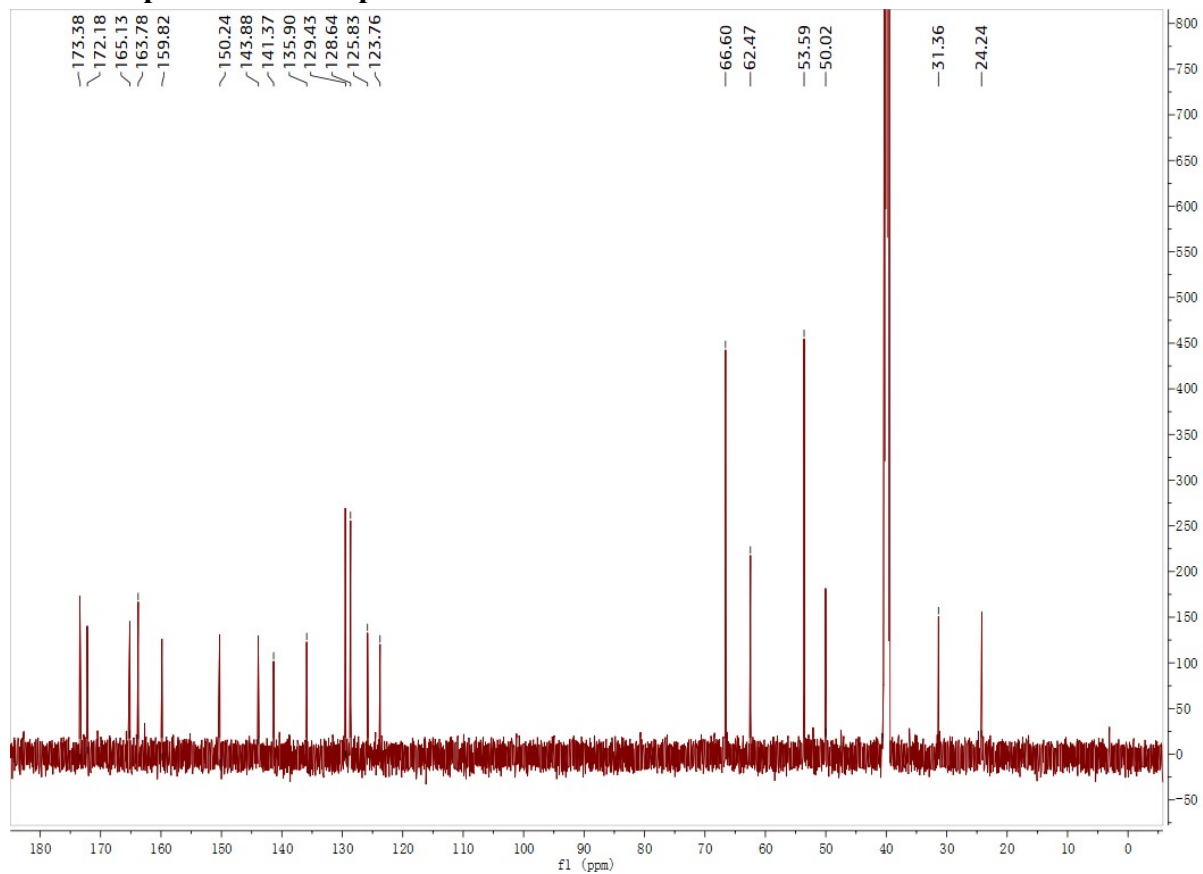

### <sup>13</sup>C NMR spectrum of compound 12k

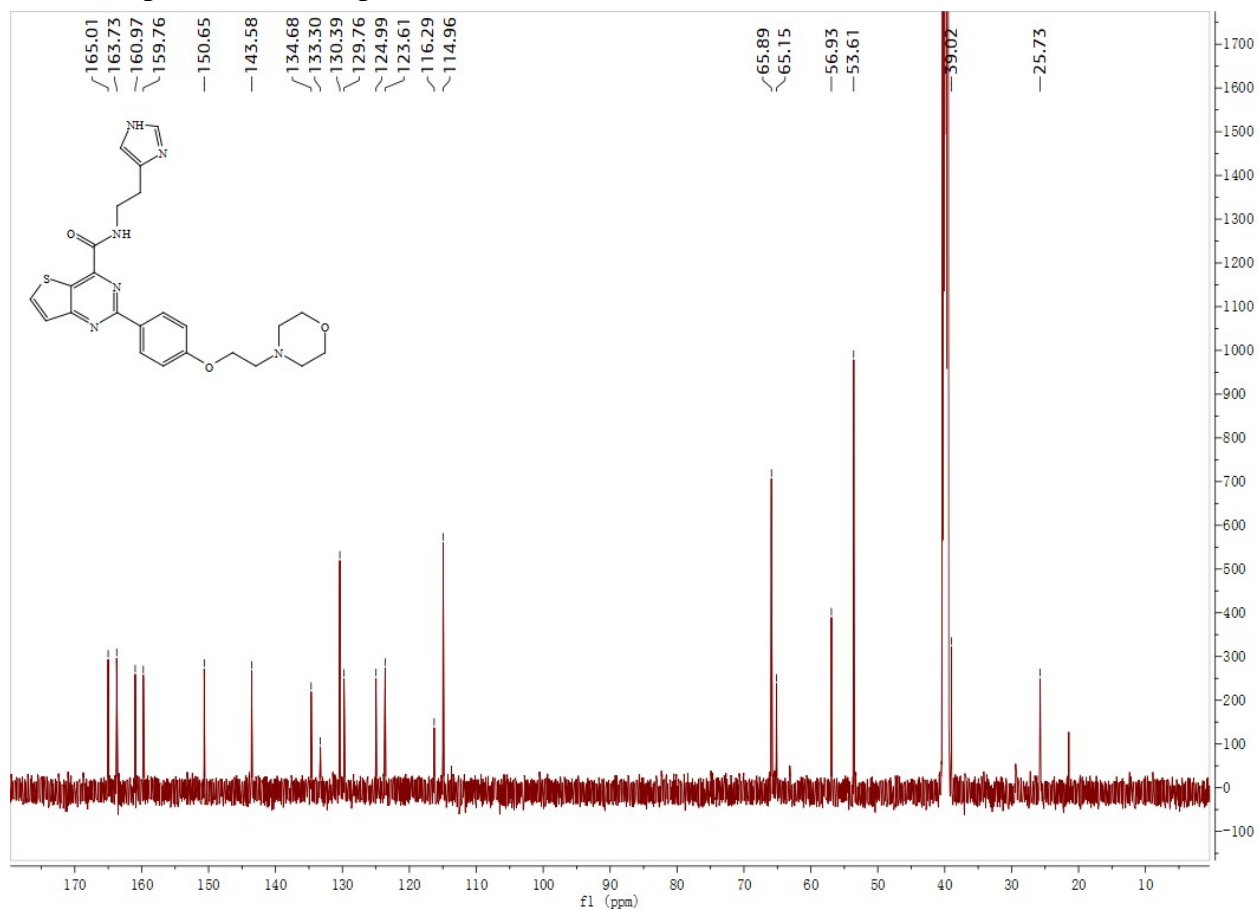

### <sup>13</sup>C NMR spectrum of compound 12n

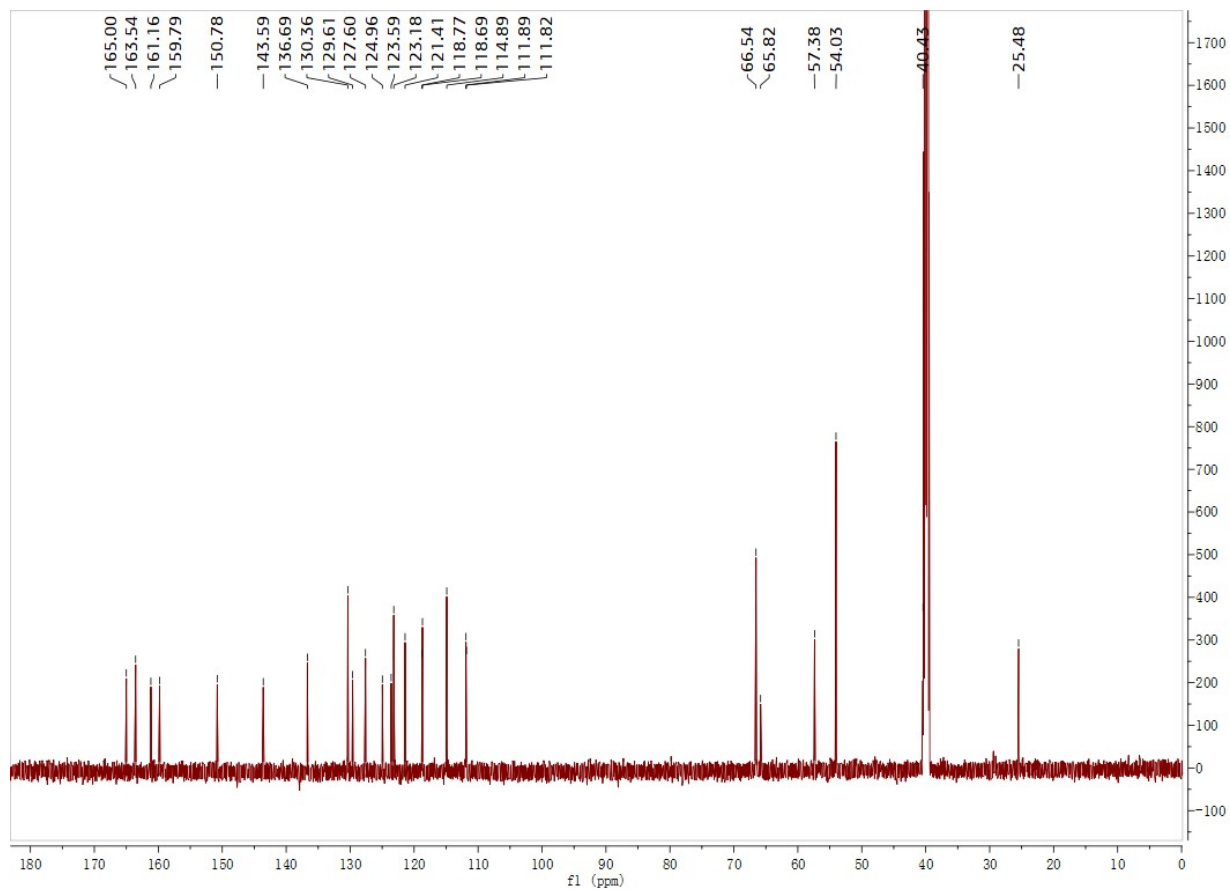

### <sup>13</sup>C NMR spectrum of compound 12o

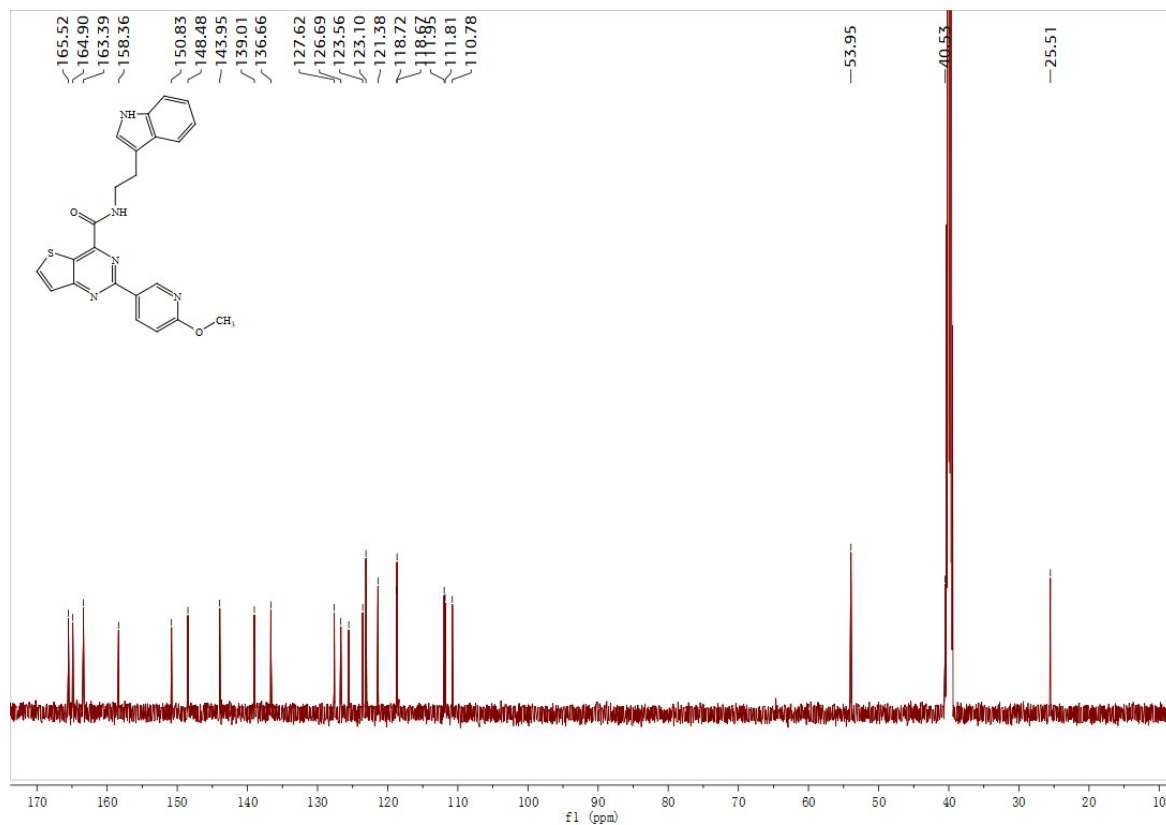

Fig. S1. Dose-response curves of target compounds for the SU-DHL-6 cell lines.

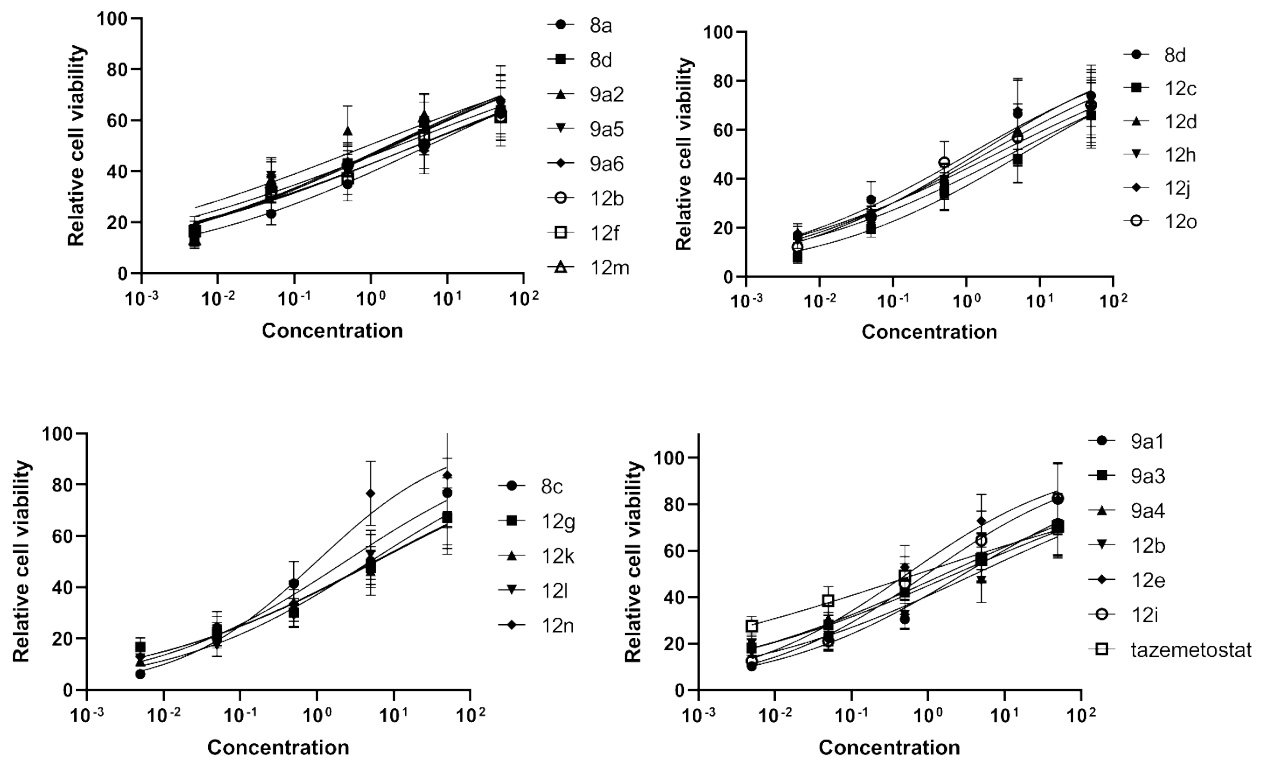

Fig. S2. Dose-response curves of target compounds for the WSU-DLCL-2 cell lines.

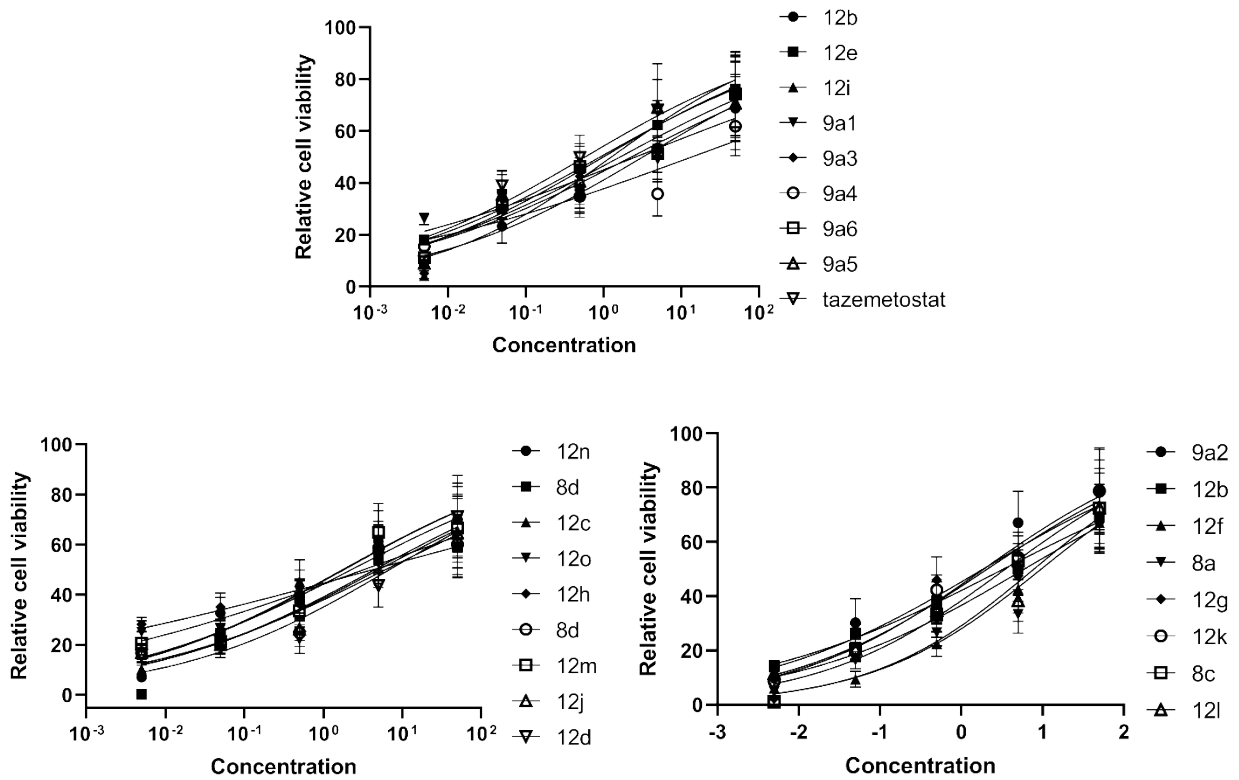

Fig. S3. Dose-response curves of target compounds for the K562 cell lines.

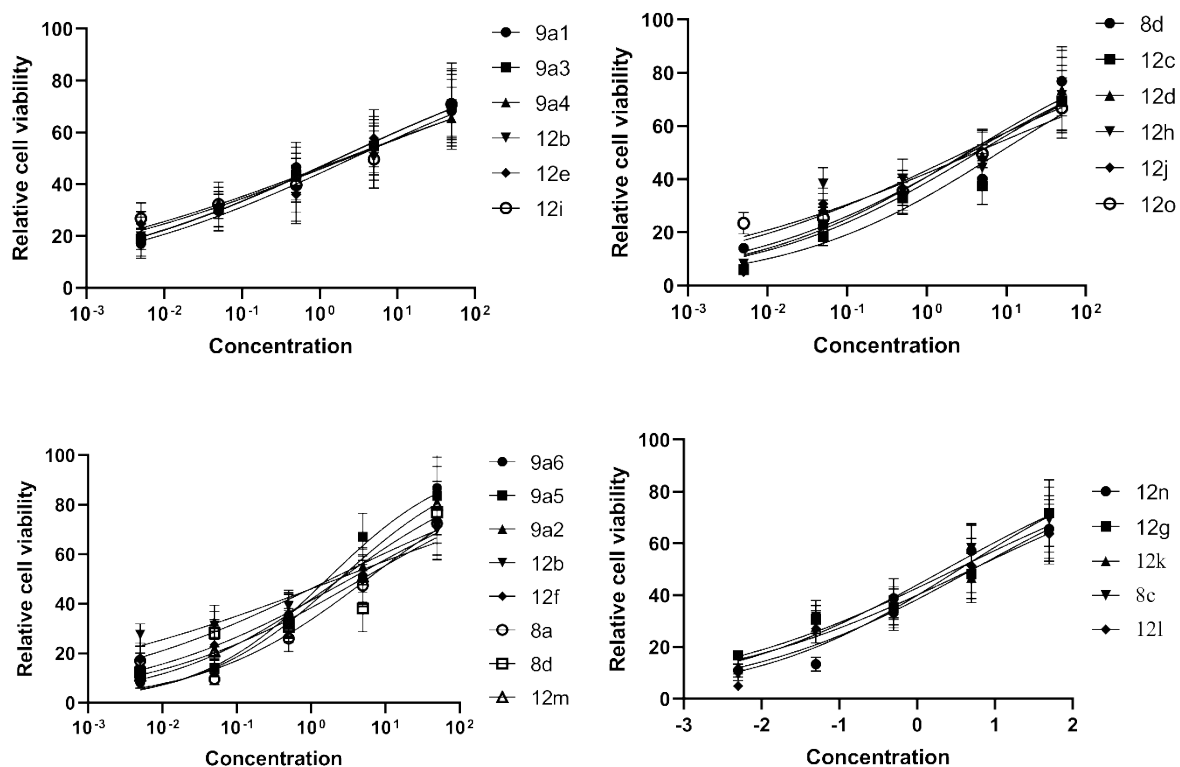

Fig. S4. Dose-response curves of target compounds for the H358 cell lines.

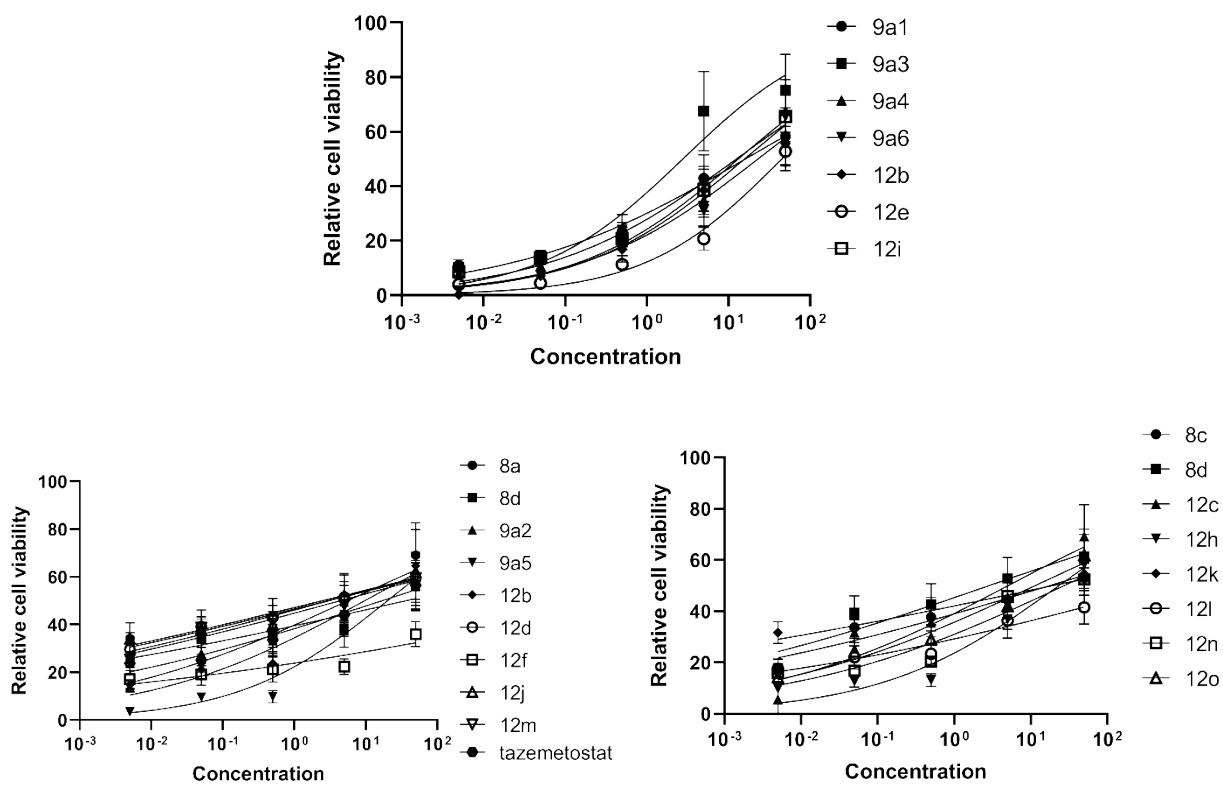

Fig. S5. Dose-response curves of target compounds for the H1703 cell lines.

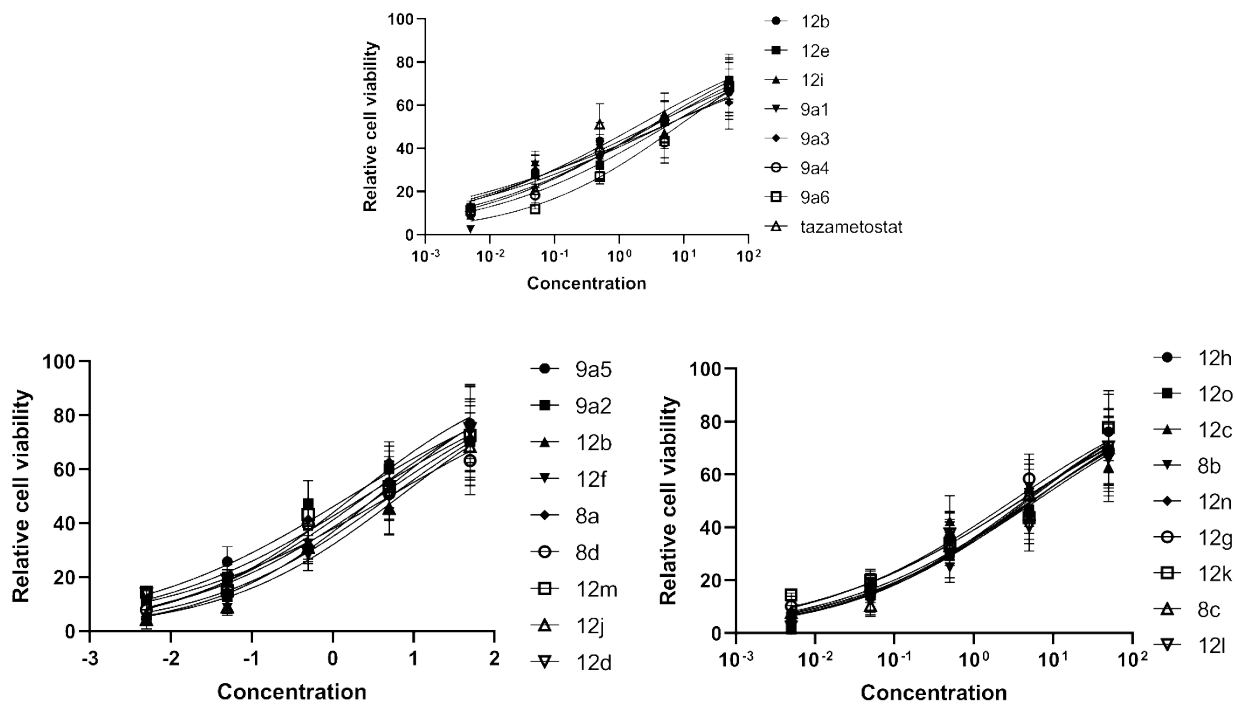

Fig. S5. Dose-response curves of target compounds for the HEK-293T cell lines.

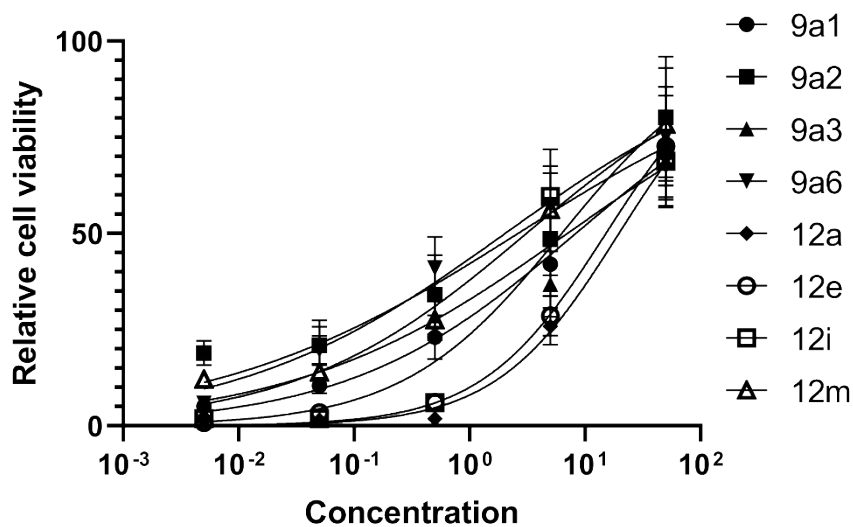

Supplement: d3nj03576j1.pdf [file d3nj03576j1.pdf]
